# Supplementary material for: Ixodes ricinus tick presence is associated with abiotic but not biotic factors
Source: PubMed Central journal article supplement — Curr Res Parasitol Vector Borne Dis. 2024 Jul 31;6:100206. doi: 10.1016/j.crpvbd.2024.100206 (PMC11367641; doi:10.1016/j.crpvbd.2024.100206), 2024-07-31
Supplement: mmc2.pdf [file mmc2.pdf]

Supplementary file S2: Additional figures and tables

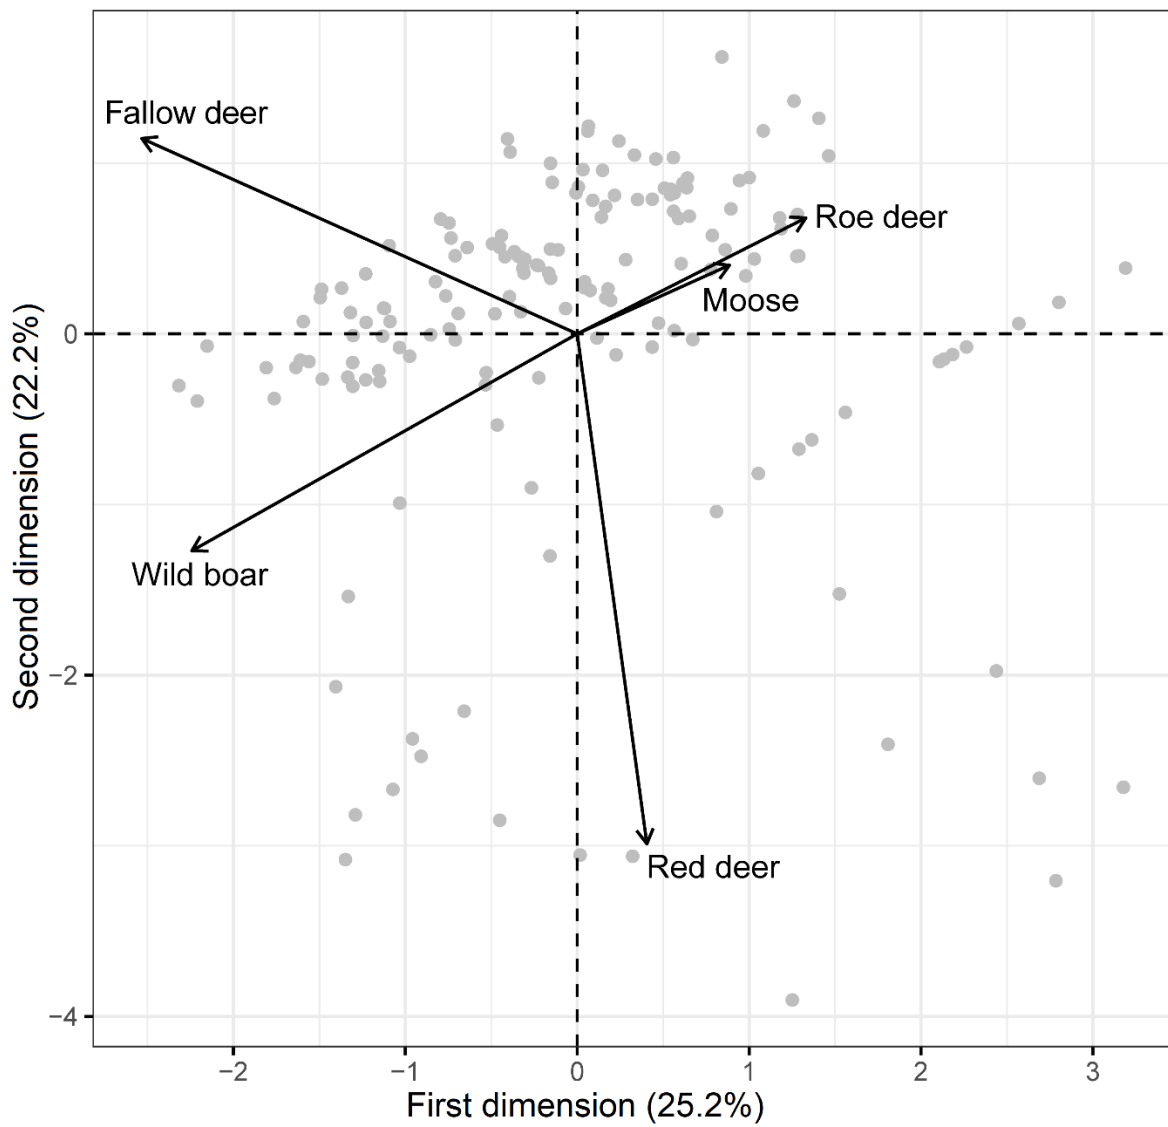

Figure B.1. Plotted PCA ordination to visualize the unguulate community composition in our study area in Södermanland county in Central Sweden. Each dot represents a sampling point.

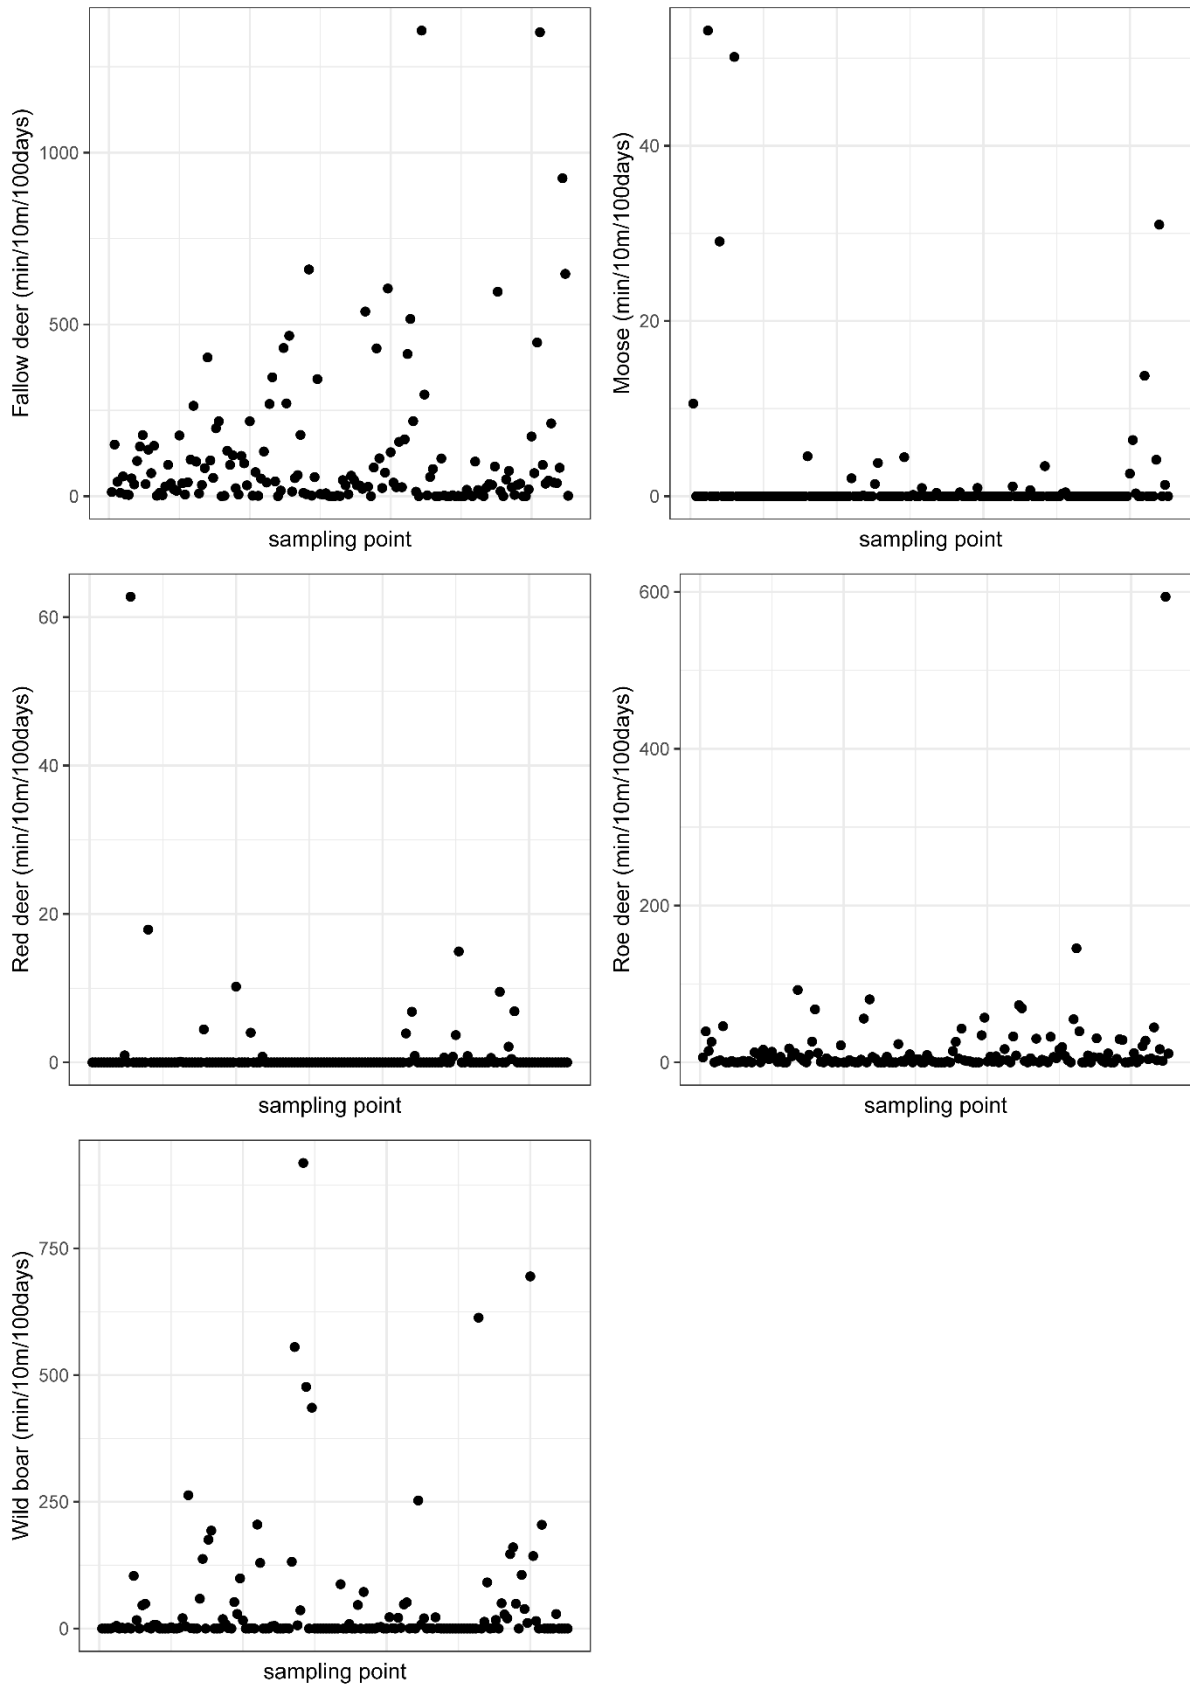

Figure B.2. Visitation frequencies of five ungulate species per sampling point. Note that the y-axes on the different panels differ.

Table B.1A. Standardized model estimates with 95% confidence intervals for the analysis of the association between the mean height of the field layer and ungulate visitation frequencies, for all species separate. Models presented are the best performing GLMMs with a gaussian distribution. The final model selected on which interpretations were based is highlighted in bold. M = model.

|     |                 | <i>Intercept</i> | <i>Month (ref: May)</i> |              |               | <i>Fallow deer</i> | <i>Roe deer</i> | <i>Red deer</i> | <i>Moose</i> | <i>Wild boar</i> | $\Delta AIC$ |
|-----|-----------------|------------------|-------------------------|--------------|---------------|--------------------|-----------------|-----------------|--------------|------------------|--------------|
|     |                 |                  | <i>June</i>             | <i>July</i>  | <i>August</i> |                    |                 |                 |              |                  |              |
| M1  | Estimate        | 0.764            | 0.255                   | 0.274        | 0.250         | -0.040             | 0.023           | -               | -            | -                | 0.00         |
|     | 95% CI          | Low.             | 0.696                   | 0.165        | 0.142         | 0.161              | -0.069          | -0.006          | -            | -                |              |
|     |                 | Upp.             | 0.833                   | 0.344        | 0.313         | 0.339              | -0.011          | 0.053           | -            | -                |              |
| M2  | Estimate        | 0.763            | 0.255                   | 0.228        | 0.254         | -0.040             | -               | -               | -            | -                | 0.14         |
|     | 95% CI          | Low.             | 0.694                   | 0.165        | 0.141         | 0.164              | -0.070          | -               | -            | -                |              |
|     |                 | Upp.             | 0.832                   | 0.346        | 0.314         | 0.343              | -0.011          | -               | -            | -                |              |
| M3  | Estimate        | 0.763            | 0.258                   | 0.233        | 0.246         | -0.039             | 0.023           | -               | 0.013        | -                | 1.69         |
|     | 95% CI          | Low.             | 0.695                   | 0.168        | 0.163         | 0.157              | -0.068          | -0.006          | -0.018       | -                |              |
|     |                 | Upp.             | 0.831                   | 0.348        | 0.320         | 0.335              | -0.010          | 0.052           | -            | 0.043            |              |
| M4  | Estimate        | 0.762            | 0.259                   | 0.233        | 0.250         | -0.039             | -               | -               | 0.013        | -                | 1.75         |
|     | 95% CI          | Low.             | 0.693                   | 0.168        | 0.146         | 0.160              | -0.069          | -               | -0.018       | -                |              |
|     |                 | Upp.             | 0.830                   | 0.350        | 0.321         | 0.340              | -0.010          | -               | -            | 0.044            |              |
| M5  | Estimate        | 0.765            | 0.253                   | 0.271        | 0.248         | -0.042             | 0.024           | -0.012          | -            | -                | 1.77         |
|     | 95% CI          | Low.             | 0.697                   | 0.163        | 0.141         | 0.160              | -0.072          | -0.005          | -0.041       | -                |              |
|     |                 | Upp.             | 0.833                   | 0.343        | 0.313         | 0.337              | -0.013          | 0.053           | 0.018        | -                |              |
| M6  | Estimate        | 0.764            | 0.254                   | 0.227        | 0.253         | -0.043             | -               | -0.011          | -            | -                | 1.96         |
|     | 95% CI          | Low.             | 0.695                   | 0.163        | 0.141         | 0.163              | -0.073          | -               | -0.041       | -                |              |
|     |                 | Upp.             | 0.833                   | 0.345        | 0.314         | 0.342              | -0.013          | -               | 0.019        | -                |              |
| M7  | Estimate        | 0.764            | 0.255                   | 0.279        | 0.250         | -0.040             | 0.023           | -               | -            | 0.001            | 2.35         |
|     | 95% CI          | Low.             | 0.696                   | 0.165        | 0.141         | 0.160              | -0.069          | -0.006          | -            | -0.028           |              |
|     |                 | Upp.             | 0.833                   | 0.345        | 0.314         | 0.341              | -0.011          | 0.053           | -            | 0.031            |              |
| M8  | Estimate        | 0.763            | 0.255                   | 0.274        | 0.253         | -0.040             | -               | -               | -            | -0.001           | 2.44         |
|     | 95% CI          | Low.             | 0.694                   | 0.164        | 0.140         | 0.162              | -0.070          | -               | -            | -0.031           |              |
|     |                 | Upp.             | 0.833                   | 0.346        | 0.315         | 0.345              | -0.011          | -               | -            | 0.029            |              |
| M9  | <b>Estimate</b> | <b>0.753</b>     | <b>0.272</b>            | <b>0.245</b> | <b>0.250</b>  | -                  | -               | -               | -            | -                | <b>3.33</b>  |
|     | <b>95% CI</b>   | <b>Low.</b>      | <b>0.678</b>            | <b>0.180</b> | <b>0.153</b>  | <b>0.156</b>       | -               | -               | -            | -                |              |
|     |                 | <b>Upp.</b>      | <b>0.827</b>            | <b>0.364</b> | <b>0.337</b>  | <b>0.344</b>       | -               | -               | -            | -                |              |
| M10 | Estimate        | 0.754            | 0.271                   | 0.244        | 0.247         | -                  | 0.023           | -               | -            | -                | 3.40         |
|     | 95% CI          | Low.             | 0.681                   | 0.180        | 0.153         | 0.154              | -               | -0.007          | -            | -                |              |
|     |                 | Upp.             | 0.828                   | 0.362        | 0.335         | 0.341              | -               | 0.052           | -            | -                |              |
| M11 | Estimate        | 0.764            | 0.256                   | 0.233        | 0.244         | -0.041             | 0.024           | -0.011          | 0.012        | -                | 3.52         |
|     | 95% CI          | Low.             | 0.696                   | 0.167        | 0.156         | 0.155              | -0.071          | -0.005          | -0.041       | -0.018           |              |
|     |                 | Upp.             | 0.832                   | 0.346        | 0.319         | 0.333              | -0.012          | 0.053           | 0.018        | 0.043            |              |

Table B.1A. [Continued]

|     |          | Intercept | Month (ref: May) |       |        | Fallow deer | Roe deer | Red deer | Moose  | Wild boar | $\Delta AIC$ |   |
|-----|----------|-----------|------------------|-------|--------|-------------|----------|----------|--------|-----------|--------------|---|
|     |          |           | June             | July  | August |             |          |          |        |           |              |   |
| M12 | Estimate | 0.762     | 0.257            | 0.233 | 0.248  | -0.042      | -        | -0.011   | 0.013  | -         | 3.63         |   |
|     | 95% CI   | Low.      | 0.694            | 0.167 | 0.156  | 0.159       | -0.072   | -        | -0.040 | -0.018    |              | - |
|     |          | Upp.      | 0.831            | 0.348 | 0.320  | 0.338       | -0.012   | -        | 0.019  | 0.044     |              | - |

Table B.1B. Standardized model estimates with 95% confidence intervals for the analysis of the association between the mean height of the field layer and ungulate visitation frequencies, for the deer species summed. Models presented are the best performing GLMMs with a gaussian distribution. The final model selected on which interpretations were based is highlighted in bold. M = model.

|    |                 | Intercept    | Month (ref: May) |              |              | Deer         | Wild boar | $\Delta AIC$ |        |
|----|-----------------|--------------|------------------|--------------|--------------|--------------|-----------|--------------|--------|
|    |                 |              | June             | July         | August       |              |           |              |        |
| M1 | Estimate        | 0.754        | 0.271            | 0.240        | 0.258        | -0.032       | -         | 0.00         |        |
|    | 95% CI          | Low.         | 0.683            | 0.180        | 0.150        | 0.165        | -0.064    |              | -      |
|    |                 | Upp.         | 0.825            | 0.362        | 0.329        | 0.351        | 0.001     |              | -      |
| M2 | <b>Estimate</b> | <b>0.753</b> | <b>0.272</b>     | <b>0.245</b> | <b>0.250</b> | -            | -         | <b>1.32</b>  |        |
|    | <b>95% CI</b>   | <b>Low.</b>  | <b>0.678</b>     | <b>0.180</b> | <b>0.153</b> | <b>0.156</b> | -         |              |        |
|    |                 | <b>Upp.</b>  | <b>0.827</b>     | <b>0.364</b> | <b>0.337</b> | <b>0.345</b> | -         |              |        |
| M3 | Estimate        | 0.753        | 0.272            | 0.241        | 0.259        | -0.032       | 0.003     | 2.29         |        |
|    | 95% CI          | Low.         | 0.681            | 0.180        | 0.150        | 0.165        | -0.064    |              | -0.030 |
|    |                 | Upp.         | 0.825            | 0.364        | 0.332        | 0.352        | 0.001     |              | 0.035  |
| M4 | Estimate        | 0.751        | 0.273            | 0.246        | 0.252        | -            | 0.003     | 3.54         |        |
|    | 95% CI          | Low.         | 0.676            | 0.180        | 0.153        | 0.157        | -         |              | -0.030 |
|    |                 | Upp.         | 0.827            | 0.366        | 0.339        | 0.347        | -         |              | 0.037  |

Table B.1C. Standardized model estimates with 95% confidence intervals for the analysis of the association between the mean height of the field layer and ungulate visitation frequencies, for all ungulate species summed. Models presented are the best performing GLMMs with a gaussian distribution. The final model selected on which interpretations were based is highlighted in bold. M = model.

|    |                 | Intercept    | Month (ref: May) |              |              | Ungulates    | $\Delta AIC$ |        |
|----|-----------------|--------------|------------------|--------------|--------------|--------------|--------------|--------|
|    |                 |              | June             | July         | August       |              |              |        |
| M1 | Estimate        | 0.757        | 0.267            | 0.234        | 0.255        | -0.035       | 0.00         |        |
|    | 95% CI          | Low.         | 0.687            | 0.176        | 0.145        | 0.163        |              | -0.068 |
|    |                 | Upp.         | 0.828            | 0.358        | 0.324        | 0.347        |              | -0.002 |
| M2 | <b>Estimate</b> | <b>0.753</b> | <b>0.272</b>     | <b>0.245</b> | <b>0.250</b> | -            | <b>2.02</b>  |        |
|    | <b>95% CI</b>   | <b>Low.</b>  | <b>0.678</b>     | <b>0.180</b> | <b>0.153</b> | <b>0.156</b> |              | -      |
|    |                 | <b>Upp.</b>  | <b>0.827</b>     | <b>0.364</b> | <b>0.337</b> | <b>0.345</b> |              | -      |

Table B.2A. Standardized model estimates with 95% confidence intervals for the analysis of the association between the coefficient of variance of the mean height of the field layer and ungulate visitation frequencies, for all species separate. Models presented are the best performing GLMMs with a gaussian distribution. The final model selected on which interpretations were based is highlighted in bold. M = model.

|     |                   | <i>Intercept</i>  | <i>Month (ref: May)</i> |             |               | <i>Fallow deer</i> | <i>Roe deer</i> | <i>Red deer</i> | <i>Moose</i> | <i>Wild boar</i> | $\Delta AIC$ |
|-----|-------------------|-------------------|-------------------------|-------------|---------------|--------------------|-----------------|-----------------|--------------|------------------|--------------|
|     |                   |                   | <i>June</i>             | <i>July</i> | <i>August</i> |                    |                 |                 |              |                  |              |
| M1  | Estimate          | 1.802             | -                       | -           | -             | 0.022              | -0.007          | -0.017          | -            | -                | 0.00         |
|     | 95% CI            | Low. 1.777        | -                       | -           | -             | -0.003             | -0.028          | -0.039          | -            | -                |              |
|     | Upp. 1.828        | -                 | -                       | -           | 0.046         | 0.015              | 0.005           | -               | -            |                  |              |
| M2  | Estimate          | 1.803             | -                       | -           | -             | 0.025              | -0.007          | -               | -            | -                | 0.01         |
|     | 95% CI            | Low. 1.776        | -                       | -           | -             | 0.001              | -0.029          | -               | -            | -                |              |
|     | Upp. 1.829        | -                 | -                       | -           | 0.049         | 0.014              | -               | -               | -            |                  |              |
| M3  | Estimate          | 1.803             | -                       | -           | -             | -                  | -0.006          | -0.020          | -            | -                | 0.64         |
|     | 95% CI            | Low. 1.774        | -                       | -           | -             | -                  | -0.027          | -0.042          | -            | -                |              |
|     | Upp. 1.832        | -                 | -                       | -           | -             | 0.016              | 0.002           | -               | -            |                  |              |
| M4  | Estimate          | 1.802             | -                       | -           | -             | 0.026              | -0.008          | -               | -            | -0.012           | 1.19         |
|     | 95% CI            | Low. 1.777        | -                       | -           | -             | 0.001              | -0.029          | -               | -            | -0.035           |              |
|     | Upp. 1.828        | -                 | -                       | -           | 0.050         | 0.014              | -               | -               | 0.010        |                  |              |
| M5  | Estimate          | 1.802             | -                       | -           | -             | 0.022              | -0.007          | -0.016          | -            | -0.011           | 1.45         |
|     | 95% CI            | Low. 1.777        | -                       | -           | -             | -0.002             | -0.029          | -0.038          | -            | -0.033           |              |
|     | Upp. 1.828        | -                 | -                       | -           | 0.047         | 0.014              | 0.006           | -               | 0.012        |                  |              |
| M6  | Estimate          | 1.803             | -                       | -           | -             | -                  | -0.006          | -               | -            | -                | 1.67         |
|     | 95% CI            | Low. 1.773        | -                       | -           | -             | -                  | -0.028          | -               | -            | -                |              |
|     | Upp. 1.833        | -                 | -                       | -           | -             | 0.016              | -               | -               | -            |                  |              |
| M7  | <b>Estimate</b>   | <b>1.803</b>      | -                       | -           | -             | -                  | -               | -               | -            | -                | <b>1.78</b>  |
|     | <b>95% CI</b>     | <b>Low. 1.773</b> | -                       | -           | -             | -                  | -               | -               | -            | -                |              |
|     | <b>Upp. 1.833</b> | -                 | -                       | -           | -             | -                  | -               | -               | -            |                  |              |
| M8  | Estimate          | 1.803             | -                       | -           | -             | 0.021              | -               | -0.017          | -            | -                | 1.85         |
|     | 95% CI            | Low. 1.776        | -                       | -           | -             | -0.003             | -               | -0.039          | -            | -                |              |
|     | Upp. 1.829        | -                 | -                       | -           | 0.046         | -                  | 0.005           | -               | -            |                  |              |
| M9  | Estimate          | 1.803             | -                       | -           | -             | -                  | -0.006          | -0.019          | -            | -0.010           | 2.14         |
|     | 95% CI            | Low. 1.774        | -                       | -           | -             | -                  | -0.028          | -0.041          | -            | -0.033           |              |
|     | Upp. 1.832        | -                 | -                       | -           | -             | 0.015              | 0.003           | -               | 0.013        |                  |              |
| M10 | Estimate          | 1.803             | -                       | -           | -             | 0.025              | -0.007          | -               | -0.002       | -                | 2.17         |
|     | 95% CI            | Low. 1.777        | -                       | -           | -             | 0.001              | -0.029          | -               | -0.024       | -                |              |
|     | Upp. 1.829        | -                 | -                       | -           | 0.049         | 0.014              | -               | 0.020           | -            |                  |              |
| M11 | Estimate          | 1.802             | -                       | -           | -             | 0.022              | -0.007          | -0.016          | -0.002       | -                | 2.20         |
|     | 95% CI            | Low. 1.777        | -                       | -           | -             | -0.003             | -0.028          | -0.039          | -0.024       | -                |              |
|     | Upp. 1.828        | -                 | -                       | -           | 0.046         | 0.015              | 0.005           | 0.020           | -            |                  |              |

Table B.2A. [Continued]

|     |             | <i>Intercept</i> | <i>Month (ref: May)</i> |             |               | <i>Fallow deer</i> | <i>Roe deer</i> | <i>Red deer</i> | <i>Moose</i> | <i>Wild boar</i> | $\Delta$ AIC |
|-----|-------------|------------------|-------------------------|-------------|---------------|--------------------|-----------------|-----------------|--------------|------------------|--------------|
|     |             |                  | <i>June</i>             | <i>July</i> | <i>August</i> |                    |                 |                 |              |                  |              |
| M12 | Estimate    | 1.803            | -                       | -           | -             | -                  | -0.006          | -0.020          | -            | -                | 2.55         |
|     | 95% CI Low. | 1.774            | -                       | -           | -             | -                  | -0.027          | -0.042          | -            | -                |              |
|     | Upp.        | 1.832            | -                       | -           | -             | -                  | 0.016           | 0.002           | -            | -                |              |
| M13 | Estimate    | 1.768            | 0.018                   | 0.060       | 0.044         | 0.022              | -               | -0.017          | -            | -                | 2.77         |
|     | 95% CI Low. | 1.715            | -0.047                  | -0.005      | -0.022        | -0.002             | -               | -0.039          | -            | -                |              |
|     | Upp.        | 1.821            | 0.083                   | 0.124       | 0.111         | 0.047              | -               | 0.004           | -            | -                |              |
| M14 | Estimate    | 1.803            | -                       | -           | -             | -                  | -               | -0.020          | -0.001       | -                | 2.81         |
|     | 95% CI Low. | 1.774            | -                       | -           | -             | -                  | -               | -0.042          | -0.023       | -                |              |
|     | Upp.        | 1.832            | -                       | -           | -             | -                  | -               | 0.002           | 0.021        | -                |              |
| M15 | Estimate    | 1.767            | 0.021                   | 0.059       | 0.046         | 0.026              | -               | -               | -            | -                | 2.86         |
|     | 95% CI Low. | 1.713            | -0.045                  | -0.006      | -0.021        | 0.001              | -               | -               | -            | -                |              |
|     | Upp.        | 1.820            | 0.086                   | 0.124       | 0.113         | 0.050              | -               | -               | -            | -                |              |
| M16 | Estimate    | 1.803            | -                       | -           | -             | -                  | -               | -               | -            | -0.011           | 2.88         |
|     | 95% CI Low. | 1.772            | -                       | -           | -             | -                  | -               | -               | -            | -0.035           |              |
|     | Upp.        | 1.833            | -                       | -           | -             | -                  | -               | -               | -            | 0.012            |              |
| M17 | Estimate    | 1.802            | -                       | -           | -             | 0.026              | -0.008          | -               | -            | -0.012           | 2.89         |
|     | 95% CI Low. | 1.777            | -                       | -           | -             | 0.001              | -0.029          | -               | -            | -0.035           |              |
|     | Upp.        | 1.828            | -                       | -           | -             | 0.050              | 0.014           | -               | -            | 0.010            |              |
| M18 | Estimate    | 1.802            | -                       | -           | -             | 0.022              | -0.007          | -0.016          | -            | -0.011           | 3.25         |
|     | 95% CI Low. | 1.777            | -                       | -           | -             | -0.002             | -0.029          | -0.038          | -            | -0.033           |              |
|     | Upp.        | 1.828            | -                       | -           | -             | 0.047              | 0.014           | 0.006           | -            | 0.012            |              |
| M19 | Estimate    | 1.802            | -                       | -           | -             | 0.025              | -               | -               | -0.003       | -0.012           | 3.37         |
|     | 95% CI Low. | 1.776            | -                       | -           | -             | 0.001              | -               | -               | -0.025       | -0.034           |              |
|     | Upp.        | 1.829            | -                       | -           | -             | 0.050              | -               | -               | 0.020        | 0.011            |              |
| M20 | Estimate    | 1.770            | 0.013                   | 0.055       | 0.046         | -                  | -               | -0.021          | -            | -                | 3.49         |
|     | 95% CI Low. | 1.715            | -0.052                  | -0.010      | -0.021        | -                  | -               | -0.042          | -            | -                |              |
|     | Upp.        | 1.825            | 0.078                   | 0.121       | 0.113         | -                  | -               | 0.001           | -            | -                |              |
| M21 | Estimate    | 1.803            | -                       | -           | -             | -                  | -0.006          | -               | -            | -                | 3.51         |
|     | 95% CI Low. | 1.773            | -                       | -           | -             | -                  | -0.028          | -               | -            | -                |              |
|     | Upp.        | 1.834            | -                       | -           | -             | -                  | 0.016           | -               | -            | -                |              |
| M22 | Estimate    | 1.802            | -                       | -           | -             | 0.022              | -               | -0.016          | -0.003       | -0.010           | 3.66         |
|     | 95% CI Low. | 1.777            | -                       | -           | -             | -0.003             | -               | -0.038          | -0.025       | -0.033           |              |
|     | Upp.        | 1.828            | -                       | -           | -             | 0.047              | -               | 0.006           | 0.019        | 0.012            |              |

Table B.2A. [Continued]

|     |          | Intercept | Month (ref: May) |      |        | Fallow deer | Roe deer | Red deer | Moose  | Wild boar | $\Delta AIC$ |
|-----|----------|-----------|------------------|------|--------|-------------|----------|----------|--------|-----------|--------------|
|     |          |           | June             | July | August |             |          |          |        |           |              |
| M23 | Estimate | 1.803     | -                | -    | -      | -           | -        | -        | -0.001 | -         | 3.81         |
|     | 95% CI   | Low.      | 1.773            | -    | -      | -           | -        | -        | -0.023 | -         |              |
|     |          | Upp.      | 1.833            | -    | -      | -           | -        | -        | 0.021  | -         |              |
| M24 | Estimate | 1.803     | -                | -    | -      | 0.025       | -0.007   | -        | -0.002 | -         | 3.98         |
|     | 95% CI   | Low.      | 1.777            | -    | -      | 0.001       | -0.029   | -        | -0.024 | -         |              |
|     |          | Upp.      | 1.829            | -    | -      | -           | 0.049    | 0.014    | -      | 0.020     |              |

Table B.2B. Standardized model estimates with 95% confidence intervals for the analysis of the association between the coefficient of variance of the mean height of the field layer and ungulate visitation frequencies, for the deer species summed. Models presented are the best performing GLMMs with a gaussian distribution. The final model selected on which interpretations were based is highlighted in bold. M = model.

|           |                 | Intercept    | Month (ref: May) |        |        | Deer   | Wild boar | $\Delta AIC$ |
|-----------|-----------------|--------------|------------------|--------|--------|--------|-----------|--------------|
|           |                 |              | June             | July   | August |        |           |              |
| <b>M1</b> | <b>Estimate</b> | <b>1.803</b> | -                | -      | -      | -      | -         | <b>0.00</b>  |
|           | <b>95% CI</b>   | <b>Low.</b>  | <b>1.773</b>     | -      | -      | -      | -         |              |
|           |                 | <b>Upp.</b>  | <b>1.833</b>     | -      | -      | -      | -         |              |
| M2        | Estimate        | 1.803        | -                | -      | -      | -      | -0.011    | 1.21         |
|           | 95% CI          | Low.         | 1.772            | -      | -      | -      | -0.035    |              |
|           |                 | Upp.         | 1.833            | -      | -      | -      | 0.012     |              |
| M3        | Estimate        | 1.803        | -                | -      | -      | -0.005 | -         | 2.00         |
|           | 95% CI          | Low.         | 1.772            | -      | -      | -      | -0.028    |              |
|           |                 | Upp.         | 1.833            | -      | -      | -      | 0.018     |              |
| M4        | Estimate        | 1.770        | 0.015            | 0.053  | 0.048  | -      | -         | 3.07         |
|           | 95% CI          | Low.         | 1.714            | -0.051 | -0.014 | -0.020 | -         |              |
|           |                 | Upp.         | 1.826            | 0.080  | 0.119  | 0.116  | -         |              |
| M5        | Estimate        | 1.803        | -                | -      | -      | -0.004 | -0.011    | 3.28         |
|           | 95% CI          | Low.         | 1.772            | -      | -      | -      | -0.027    |              |
|           |                 | Upp.         | 1.834            | -      | -      | -      | 0.019     |              |

Table B.2C. Standardized model estimates with 95% confidence intervals for the analysis of the association between the coefficient of variance of the mean height of the field layer and ungulate visitation frequencies, for all ungulate species summed. Models presented are the best performing GLMMs with a gaussian distribution. The final model selected on which interpretations were based is highlighted in bold. M = model.

|           |                   | <i>Intercept</i>  | <i>Month (ref: May)</i> |             |               | <i>Ungulates</i> | <i>ΔAIC</i> |
|-----------|-------------------|-------------------|-------------------------|-------------|---------------|------------------|-------------|
|           |                   |                   | <i>June</i>             | <i>July</i> | <i>August</i> |                  |             |
| <b>M1</b> | <b>Estimate</b>   | <b>1.803</b>      | -                       | -           | -             | -                | <b>0.00</b> |
|           | <b>95% CI</b>     | <b>Low. 1.773</b> | -                       | -           | -             | -                |             |
|           | <b>Upp. 1.833</b> | -                 | -                       | -           | -             | -                |             |
| M2        | Estimate          | 1.803             | -                       | -           | -             | -0.005           | 1.97        |
|           | 95% CI            | Low. 1.772        | -                       | -           | -             | -0.028           |             |
|           | Upp. 1.833        | -                 | -                       | -           | -             | 0.018            |             |
| M3        | Estimate          | 1.770             | 0.015                   | 0.053       | 0.048         | -                | 3.07        |
|           | 95% CI            | Low. 1.714        | -0.051                  | -0.014      | -0.020        | -                |             |
|           | Upp. 1.826        | 0.080             | 0.119                   | 0.116       | -             |                  |             |



Table B.3A. Standardized model estimates with 95% confidence intervals for the analysis of the association between the presence of questing *I. ricinus* larvae and ungulate visitation frequencies. Models presented are the best performing GLMMs with a binomial distribution. The final model selected on which interpretations were based is highlighted in bold. M = model.

|     |          | Intercept          | Month (ref: May) |        |        | Fallow deer | Roe deer | Red deer | Moose  | Wild boar | Mean height field layer | Coefficient of variance of height field layer | Temperature | $\Delta AIC$ |
|-----|----------|--------------------|------------------|--------|--------|-------------|----------|----------|--------|-----------|-------------------------|-----------------------------------------------|-------------|--------------|
|     |          |                    | June             | July   | August |             |          |          |        |           |                         |                                               |             |              |
| M1  | Estimate | <b>0.137</b>       | -                | -      | -      | -           | -        | -        | -      | -         | -                       | -                                             | -           | <b>0.00</b>  |
|     | 95% CI   | <b>Low. -0.502</b> | -                | -      | -      | -           | -        | -        | -      | -         | -                       | -                                             | -           |              |
|     |          | <b>Upp. 0.776</b>  | -                | -      | -      | -           | -        | -        | -      | -         | -                       | -                                             | -           |              |
| M2  | Estimate | 0.136              | -                | -      | -      | -           | -        | -        | -      | -         | -                       | 0.179                                         | 0.86        |              |
|     | 95% CI   | Low. -0.511        | -                | -      | -      | -           | -        | -        | -      | -         | -                       | -0.276                                        |             |              |
|     |          | Upp. 0.784         | -                | -      | -      | -           | -        | -        | -      | -         | -                       | 0.634                                         |             |              |
| M3  | Estimate | -0.895             | 1.492            | 1.307  | 0.888  | -           | -        | -        | -      | -         | -                       | -                                             | 1.23        |              |
|     | 95% CI   | Low. -2.111        | 0.087            | -0.113 | -0.528 | -           | -        | -        | -      | -         | -                       | -                                             |             |              |
|     |          | Upp. 0.321         | 2.896            | 2.727  | 2.305  | -           | -        | -        | -      | -         | -                       | -                                             |             |              |
| M4  | Estimate | 0.139              | -                | -      | -      | -           | -0.181   | -        | -      | -         | -                       | -                                             | 1.44        |              |
|     | 95% CI   | Low. -0.513        | -                | -      | -      | -           | -0.618   | -        | -      | -         | -                       | -                                             |             |              |
|     |          | Upp. 0.790         | -                | -      | -      | -           | 0.256    | -        | -      | -         | -                       | -                                             |             |              |
| M5  | Estimate | 0.141              | -                | -      | -      | -           | -        | 0.149    | -      | -         | -                       | -                                             | 1.66        |              |
|     | 95% CI   | Low. -0.510        | -                | -      | -      | -           | -        | -0.290   | -      | -         | -                       | -                                             |             |              |
|     |          | Upp. 0.791         | -                | -      | -      | -           | -        | 0.588    | -      | -         | -                       | -                                             |             |              |
| M6  | Estimate | 0.142              | -                | -      | -      | -0.142      | -        | -        | -      | -         | -                       | -                                             | 1.77        |              |
|     | 95% CI   | Low. -0.502        | -                | -      | -      | -0.625      | -        | -        | -      | -         | -                       | -                                             |             |              |
|     |          | Upp. 0.785         | -                | -      | -      | 0.341       | -        | -        | -      | -         | -                       | -                                             |             |              |
| M7  | Estimate | 0.137              | -                | -      | -      | -           | -        | -        | -      | 0.113     | -                       | -                                             | 1.85        |              |
|     | 95% CI   | Low. -0.501        | -                | -      | -      | -           | -        | -        | -      | -0.323    | -                       | -                                             |             |              |
|     |          | Upp. 0.776         | -                | -      | -      | -           | -        | -        | -      | 0.549     | -                       | -                                             |             |              |
| M8  | Estimate | 0.137              | -                | -      | -      | -           | 0.110    | -        | -      | -         | -                       | -                                             | 1.87        |              |
|     | 95% CI   | Low. -0.496        | -                | -      | -      | -           | -0.338   | -        | -      | -         | -                       | -                                             |             |              |
|     |          | Upp. 0.770         | -                | -      | -      | -           | 0.558    | -        | -      | -         | -                       | -                                             |             |              |
| M9  | Estimate | 0.134              | -                | -      | -      | -           | -        | -        | -      | -         | -0.079                  | -                                             | 2.00        |              |
|     | 95% CI   | Low. -0.494        | -                | -      | -      | -           | -        | -        | -      | -         | -0.544                  | -                                             |             |              |
|     |          | Upp. 0.761         | -                | -      | -      | -           | -        | -        | -      | -         | 0.386                   | -                                             |             |              |
| M10 | Estimate | 0.137              | -                | -      | -      | -           | -        | -        | 0.018  | -         | -                       | -                                             | 2.10        |              |
|     | 95% CI   | Low. -0.503        | -                | -      | -      | -           | -        | -        | -0.446 | -         | -                       | -                                             |             |              |
|     |          | Upp. 0.777         | -                | -      | -      | -           | -        | -        | 0.482  | -         | -                       | -                                             |             |              |
| M11 | Estimate | 0.138              | -                | -      | -      | -           | -0.172   | -        | -      | -         | -                       | 0.169                                         | 2.44        |              |
|     | 95% CI   | Low. -0.522        | -                | -      | -      | -           | -0.612   | -        | -      | -         | -                       | -0.291                                        |             |              |
|     |          | Upp. 0.797         | -                | -      | -      | -           | 0.269    | -        | -      | -         | -                       | 0.629                                         |             |              |

Table B.3A. [Continued]

|     |             | <i>Intercept</i> | <i>Month (ref: May)</i> |             |               | <i>Fallow deer</i> | <i>Roe deer</i> | <i>Red deer</i> | <i>Moose</i> | <i>Wild boar</i> | <i>Mean height field layer</i> | <i>Coefficient of variance of height field layer</i> | <i>Temperature</i> | <i>ΔAIC</i> |
|-----|-------------|------------------|-------------------------|-------------|---------------|--------------------|-----------------|-----------------|--------------|------------------|--------------------------------|------------------------------------------------------|--------------------|-------------|
|     |             |                  | <i>June</i>             | <i>July</i> | <i>August</i> |                    |                 |                 |              |                  |                                |                                                      |                    |             |
| M12 | Estimate    | 0.139            | -                       | -           | -             | -                  | -               | 0.162           | -            | -                | -                              | 0.191                                                | 2.48               |             |
|     | 95% CI Low. | -0.520           | -                       | -           | -             | -                  | -               | -0.280          | -            | -                | -                              | -0.267                                               |                    |             |
|     | Upp.        | 0.798            | -                       | -           | -             | -                  | -               | 0.603           | -            | -                | -                              | 0.649                                                |                    |             |
| M13 | Estimate    | -0.901           | 1.539                   | 1.381       | 0.786         | -                  | -               | 0.226           | -            | -                | -                              | -                                                    | 2.54               |             |
|     | 95% CI Low. | -2.142           | 0.113                   | -0.068      | -0.667        | -                  | -               | -0.242          | -            | -                | -                              | -                                                    |                    |             |
|     | Upp.        | 0.340            | 2.964                   | 2.830       | 2.249         | -                  | -               | 0.694           | -            | -                | -                              | -                                                    |                    |             |
| M14 | Estimate    | 1.131            | -                       | -           | -             | -                  | -               | -               | -            | -                | -0.122                         | 0.201                                                | 2.66               |             |
|     | 95% CI Low. | -0.499           | -                       | -           | -             | -                  | -               | -               | -            | -                | -0.600                         | -0.259                                               |                    |             |
|     | Upp.        | 0.761            | -                       | -           | -             | -                  | -               | -               | -            | -                | 0.356                          | 0.661                                                |                    |             |
| M15 | Estimate    | -0.912           | 1.509                   | 1.318       | 0.930         | -                  | -0.186          | -               | -            | -                | -                              | -                                                    | 2.78               |             |
|     | 95% CI Low. | -2.142           | 0.096                   | -0.112      | -0.503        | -                  | -0.634          | -               | -            | -                | -                              | -                                                    |                    |             |
|     | Upp.        | 0.317            | 2.923                   | 2.748       | 2.362         | -                  | 0.262           | -               | -            | -                | -                              | -                                                    |                    |             |
| M16 | Estimate    | 0.141            | -                       | -           | -             | -0.125             | -               | -               | -            | -                | -                              | 0.168                                                | 2.79               |             |
|     | 95% CI Low. | -0.510           | -                       | -           | -             | -0.613             | -               | -               | -            | -                | -                              | -0.289                                               |                    |             |
|     | Upp.        | 0.791            | -                       | -           | -             | 0.363              | -               | -               | -            | -                | -                              | 0.625                                                |                    |             |
| M17 | Estimate    | 0.138            | -                       | -           | -             | -                  | -               | 0.099           | -            | -                | -                              | 0.171                                                | 2.85               |             |
|     | 95% CI Low. | -0.505           | -                       | -           | -             | -                  | -               | -0.359          | -            | -                | -                              | -0.284                                               |                    |             |
|     | Upp.        | 0.780            | -                       | -           | -             | -                  | -               | 0.556           | -            | -                | -                              | 0.627                                                |                    |             |
| M18 | Estimate    | 0.136            | -                       | -           | -             | -                  | -               | -               | -            | 0.073            | -                              | 0.159                                                | 2.97               |             |
|     | 95% CI Low. | -0.510           | -                       | -           | -             | -                  | -               | -               | -            | -0.379           | -                              | -0.311                                               |                    |             |
|     | Upp.        | 0.782            | -                       | -           | -             | -                  | -               | -               | -            | 0.525            | -                              | 0.630                                                |                    |             |
| M19 | Estimate    | 0.136            | -                       | -           | -             | -                  | -               | -               | 0.033        | -                | -                              | 0.182                                                | 2.98               |             |
|     | 95% CI Low. | -0.513           | -                       | -           | -             | -                  | -               | -               | -0.437       | -                | -                              | -0.275                                               |                    |             |
|     | Upp.        | 0.786            | -                       | -           | -             | -                  | -               | -               | 0.502        | -                | -                              | 0.639                                                |                    |             |
| M20 | Estimate    | 0.142            | -                       | -           | -             | -                  | -0.185          | 0.154           | -            | -                | -                              | -                                                    | 3.11               |             |
|     | 95% CI Low. | -0.521           | -                       | -           | -             | -                  | -0.624          | -0.287          | -            | -                | -                              | -                                                    |                    |             |
|     | Upp.        | 0.805            | -                       | -           | -             | -                  | 0.253           | 0.596           | -            | -                | -                              | -                                                    |                    |             |
| M21 | Estimate    | -0.936           | 1.504                   | 1.371       | 0.941         | -                  | -               | -               | -            | -                | -0.144                         | -                                                    | 3.11               |             |
|     | 95% CI Low. | -2.135           | 0.110                   | -0.047      | -0.468        | -                  | -               | -               | -            | -                | -0.623                         | -                                                    |                    |             |
|     | Upp.        | 0.263            | 2.899                   | 2.789       | 2.349         | -                  | -               | -               | -            | -                | 0.335                          | -                                                    |                    |             |
| M22 | Estimate    | -0.890           | 1.495                   | 1.293       | 0.896         | -                  | -               | 0.121           | -            | -                | -                              | -                                                    | 3.20               |             |
|     | 95% CI Low. | -2.095           | 0.096                   | -0.119      | -0.514        | -                  | -               | -0.352          | -            | -                | -                              | -                                                    |                    |             |
|     | Upp.        | 0.315            | 2.894                   | 2.705       | 2.307         | -                  | -               | 0.593           | -            | -                | -                              | -                                                    |                    |             |
| M23 | Estimate    | 0.142            | -                       | -           | -             | -                  | -0.126          | -               | -            | 0.095            | -                              | -                                                    | 3.24               |             |
|     | 95% CI Low. | -0.501           | -                       | -           | -             | -                  | -0.614          | -               | -            | -0.347           | -                              | -                                                    |                    |             |
|     | Upp.        | 0.785            | -                       | -           | -             | -                  | 0.363           | -               | -            | 0.537            | -                              | -                                                    |                    |             |

Table B.3A. [Continued]

|     |          | <i>Intercept</i> | <i>Month (ref: May)</i> |             |               | <i>Fallow deer</i> | <i>Roe deer</i> | <i>Red deer</i> | <i>Moose</i> | <i>Wild boar</i> | <i>Mean height field layer</i> | <i>Coefficient of variance of height field layer</i> | <i>Temperature</i> | $\Delta$ AIC |
|-----|----------|------------------|-------------------------|-------------|---------------|--------------------|-----------------|-----------------|--------------|------------------|--------------------------------|------------------------------------------------------|--------------------|--------------|
|     |          |                  | <i>June</i>             | <i>July</i> | <i>August</i> |                    |                 |                 |              |                  |                                |                                                      |                    |              |
| M24 | Estimate | -0.995           | 1.630                   | 1.430       | 0.996         | -                  | -               | -               | -            | -                | -0.114                         | -                                                    | -                  | 3.24         |
|     | 95% CI   | Low.             | -2.282                  | 0.102       | -0.084        | -0.492             | -               | -               | -            | -                | -0.601                         | -                                                    | -                  |              |
|     | Upp.     | 0.292            | 3.157                   | 2.944       | 2.484         | -                  | -               | -               | -            | -                | 0.372                          | -                                                    | -                  |              |
| M25 | Estimate | 0.144            | -                       | -           | -             | -0.144             | -0.183          | -               | -            | -                | -                              | -                                                    | -                  | 3.24         |
|     | 95% CI   | Low.             | -0.512                  | -           | -             | -                  | -0.631          | -0.622          | -            | -                | -                              | -                                                    | -                  |              |
|     | Upp.     | 0.800            | -                       | -           | -             | 0.342              | 0.256           | -               | -            | -                | -                              | -                                                    | -                  |              |
| M26 | Estimate | 0.139            | -                       | -           | -             | -                  | -0.184          | 0.116           | -            | -                | -                              | -                                                    | -                  | 3.33         |
|     | 95% CI   | Low.             | -0.507                  | -           | -             | -                  | -0.621          | -0.336          | -            | -                | -                              | -                                                    | -                  |              |
|     | Upp.     | 0.785            | -                       | -           | -             | -                  | 0.253           | 0.568           | -            | -                | -                              | -                                                    | -                  |              |
| M27 | Estimate | -0.881           | 1.471                   | 1.289       | 0.885         | -0.071             | -               | -               | -            | -                | -                              | -                                                    | -                  | 3.37         |
|     | 95% CI   | Low.             | -2.102                  | 0.058       | -0.137        | -0.533             | -0.561          | -               | -            | -                | -                              | -                                                    | -                  |              |
|     | Upp.     | 0.340            | 2.883                   | 2.715       | 2.303         | 0.419              | -               | -               | -            | -                | -                              | -                                                    | -                  |              |
| M28 | Estimate | -0.909           | 1.514                   | 1.314       | 0.917         | -                  | -               | -               | -            | 0.063            | -                              | -                                                    | -                  | 3.39         |
|     | 95% CI   | Low.             | -2.132                  | 0.097       | -0.108        | -0.518             | -               | -               | -            | -0.418           | -                              | -                                                    | -                  |              |
|     | Upp.     | 0.314            | 2.932                   | 2.736       | 2.352         | -                  | -               | -               | -            | 0.544            | -                              | -                                                    | -                  |              |
| M29 | Estimate | -1.074           | 1.626                   | 1.616       | 1.080         | -                  | -               | -               | -            | -                | -                              | -0.150                                               | -                  | 3.43         |
|     | 95% CI   | Low.             | -2.496                  | 0.113       | -0.320        | -0.546             | -               | -               | -            | -                | -                              | -0.791                                               | -                  |              |
|     | Upp.     | 0.348            | 3.138                   | 3.553       | 2.706         | -                  | -               | -               | -            | -                | -                              | 0.492                                                | -                  |              |
| M30 | Estimate | 0.135            | -                       | -           | -             | -                  | -0.184          | -               | -            | -                | -                              | -0.088                                               | -                  | 3.45         |
|     | 95% CI   | Low.             | -0.504                  | -           | -             | -                  | -0.621          | -               | -            | -                | -                              | -0.555                                               | -                  |              |
|     | Upp.     | 0.774            | -                       | -           | -             | -                  | 0.252           | -               | -            | -                | -                              | 0.379                                                | -                  |              |
| M31 | Estimate | 0.146            | -                       | -           | -             | -0.138             | -               | -               | 0.146        | -                | -                              | -                                                    | -                  | 3.49         |
|     | 95% CI   | Low.             | -0.510                  | -           | -             | -0.627             | -               | -               | -0.294       | -                | -                              | -                                                    | -                  |              |
|     | Upp.     | 0.801            | -                       | -           | -             | 0.350              | -               | -               | 0.587        | -                | -                              | -                                                    | -                  |              |
| M32 | Estimate | 0.141            | -                       | -           | -             | -                  | -               | -               | 0.148        | -                | 0.112                          | -                                                    | -                  | 3.55         |
|     | 95% CI   | Low.             | -0.509                  | -           | -             | -                  | -               | -               | -0.291       | -                | -0.327                         | -                                                    | -                  |              |
|     | Upp.     | 0.791            | -                       | -           | -             | -                  | -               | -               | 0.588        | -                | 0.551                          | -                                                    | -                  |              |
| M33 | Estimate | 0.139            | -                       | -           | -             | -                  | -0.181          | -               | -            | 0.006            | -                              | -                                                    | -                  | 3.58         |
|     | 95% CI   | Low.             | -0.513                  | -           | -             | -                  | -0.619          | -               | -            | -0.463           | -                              | -                                                    | -                  |              |
|     | Upp.     | 0.790            | -                       | -           | -             | -                  | 0.257           | -               | -            | 0.475            | -                              | -                                                    | -                  |              |
| M34 | Estimate | 0.141            | -                       | -           | -             | -                  | -               | 0.106           | 0.146        | -                | -                              | -                                                    | -                  | 3.59         |
|     | 95% CI   | Low.             | -0.504                  | -           | -             | -                  | -               | -0.344          | -0.293       | -                | -                              | -                                                    | -                  |              |
|     | Upp.     | 0.785            | -                       | -           | -             | -                  | -               | 0.556           | 0.584        | -                | -                              | -                                                    | -                  |              |
| M35 | Estimate | 0.138            | -                       | -           | -             | -                  | -               | -               | 0.145        | -                | -                              | -0.070                                               | -                  | 3.72         |
|     | 95% CI   | Low.             | -0.503                  | -           | -             | -                  | -               | -               | -0.293       | -                | -                              | -0.538                                               | -                  |              |
|     | Upp.     | 0.779            | -                       | -           | -             | -                  | -               | -               | 0.584        | -                | -                              | 0.398                                                | -                  |              |

Table B.3A. [Continued]

|     |             | Intercept | Month (ref: May) |      |        | Fallow deer | Roe deer | Red deer | Moose  | Wild boar | Mean height field layer | Coefficient of variance of height field layer | Temperature | $\Delta$ AIC |
|-----|-------------|-----------|------------------|------|--------|-------------|----------|----------|--------|-----------|-------------------------|-----------------------------------------------|-------------|--------------|
|     |             |           | June             | July | August |             |          |          |        |           |                         |                                               |             |              |
| M36 | Estimate    | 0.138     | -                | -    | -      | -           | 0.117    | -        | -      | 0.119     | -                       | -                                             | 3.74        |              |
|     | 95% CI Low. | -0.494    | -                | -    | -      | -           | -0.333   | -        | -      | -0.318    | -                       | -                                             |             |              |
|     | Upp.        | 0.770     | -                | -    | -      | -           | 0.567    | -        | -      | 0.555     | -                       | -                                             |             |              |
| M37 | Estimate    | 0.142     | -                | -    | -      | -0.126      | -        | -        | -      | 0.095     | -                       | -                                             | 3.74        |              |
|     | 95% CI Low. | -0.501    | -                | -    | -      | -0.614      | -        | -        | -      | -0.347    | -                       | -                                             |             |              |
|     | Upp.        | 0.785     | -                | -    | -      | 0.363       | -        | -        | -      | 0.537     | -                       | -                                             |             |              |
| M38 | Estimate    | 0.142     | -                | -    | -      | -0.127      | -        | 0.093    | -      | -         | -                       | -                                             | 3.76        |              |
|     | 95% CI Low. | -0.497    | -                | -    | -      | -0.617      | -        | -0.362   | -      | -         | -                       | -                                             |             |              |
|     | Upp.        | 0.781     | -                | -    | -      | 0.363       | -        | 0.548    | -      | -         | -                       | -                                             |             |              |
| M39 | Estimate    | 0.141     | -                | -    | -      | -           | -        | 0.152    | 0.030  | -         | -                       | -                                             | 3.79        |              |
|     | 95% CI Low. | -0.512    | -                | -    | -      | -           | -        | -0.289   | -0.438 | -         | -                       | -                                             |             |              |
|     | Upp.        | 0.793     | -                | -    | -      | -           | -        | 0.592    | 0.498  | -         | -                       | -                                             |             |              |
| M40 | Estimate    | 0.139     | -                | -    | -      | -0.133      | -        | -        | -      | -         | -0.062                  | -                                             | 3.85        |              |
|     | 95% CI Low. | -0.496    | -                | -    | -      | -0.619      | -        | -        | -      | -         | -0.531                  | -                                             |             |              |
|     | Upp.        | 0.774     | -                | -    | -      | 0.352       | -        | -        | -      | -         | 0.406                   | -                                             |             |              |
| M41 | Estimate    | 0.134     | -                | -    | -      | -           | -        | -        | -      | 0.118     | -0.087                  | -                                             | 3.86        |              |
|     | 95% CI Low. | -0.492    | -                | -    | -      | -           | -        | -        | -      | -0.317    | -0.553                  | -                                             |             |              |
|     | Upp.        | 0.760     | -                | -    | -      | -           | -        | -        | -      | 0.552     | 0.378                   | -                                             |             |              |
| M42 | Estimate    | 0.142     | -                | -    | -      | -0.142      | -        | -        | 0.017  | -         | -                       | -                                             | 3.91        |              |
|     | 95% CI Low. | -0.502    | -                | -    | -      | -0.625      | -        | -        | -0.447 | -         | -                       | -                                             |             |              |
|     | Upp.        | 0.786     | -                | -    | -      | 0.341       | -        | -        | 0.481  | -         | -                       | -                                             |             |              |
| M43 | Estimate    | 0.138     | -                | -    | -      | -           | 0.117    | -        | -      | -         | 0.119                   | -                                             | 3.95        |              |
|     | 95% CI Low. | -0.494    | -                | -    | -      | -           | -0.333   | -        | -      | -         | -0.318                  | -                                             |             |              |
|     | Upp.        | 0.770     | -                | -    | -      | -           | 0.567    | -        | -      | -         | 0.555                   | -                                             |             |              |
| M44 | Estimate    | 0.138     | -                | -    | -      | -           | -        | -        | 0.015  | 0.112     | -                       | -                                             | 3.99        |              |
|     | 95% CI Low. | -0.501    | -                | -    | -      | -           | -        | -        | -0.449 | -0.324    | -                       | -                                             |             |              |
|     | Upp.        | 0.776     | -                | -    | -      | -           | -        | -        | 0.479  | 0.549     | -                       | -                                             |             |              |

Table B.3B. Standardized model estimates with 95% confidence intervals for the analysis of the association between the presence of questing *I. ricinus* larvae and ungulate visitation frequencies, for the deer species summed. Models presented are the best performing GLMMs with a binomial distribution. The final model selected on which interpretations were based is highlighted in bold. M = model.

|     |          | Intercept          | Month (ref: May) |        |        | Deer   | Wild boar | Mean height field layer | Coefficient of variance of height field layer | Temperature | $\Delta AIC$ |
|-----|----------|--------------------|------------------|--------|--------|--------|-----------|-------------------------|-----------------------------------------------|-------------|--------------|
|     |          |                    | June             | July   | August |        |           |                         |                                               |             |              |
| M1  | Estimate | <b>0.137</b>       | -                | -      | -      | -      | -         | -                       | -                                             | -           | <b>0.00</b>  |
|     | 95% CI   | <b>Low. -0.502</b> | -                | -      | -      | -      | -         | -                       | -                                             | -           |              |
|     |          | <b>Upp. 0.776</b>  | -                | -      | -      | -      | -         | -                       | -                                             | -           |              |
| M2  | Estimate | 0.136              | -                | -      | -      | -      | -         | -                       | 0.179                                         | -           | 0.86         |
|     | 95% CI   | Low. -0.511        | -                | -      | -      | -      | -         | -                       | -0.276                                        | -           |              |
|     |          | Upp. 0.784         | -                | -      | -      | -      | -         | -                       | 0.634                                         | -           |              |
| M3  | Estimate | -0.895             | 1.492            | 1.307  | 0.888  | -      | -         | -                       | -                                             | -           | 1.23         |
|     | 95% CI   | Low. -2.111        | -0.087           | -0.113 | -0.528 | -      | -         | -                       | -                                             | -           |              |
|     |          | Upp. 0.321         | 2.897            | 2.727  | 2.305  | -      | -         | -                       | -                                             | -           |              |
| M4  | Estimate | 0.137              | -                | -      | -      | -      | -         | 0.113                   | -                                             | -           | 1.85         |
|     | 95% CI   | Low. -0.501        | -                | -      | -      | -      | -         | -0.323                  | -                                             | -           |              |
|     |          | Upp. 0.776         | -                | -      | -      | -      | -         | 0.549                   | -                                             | -           |              |
| M5  | Estimate | 0.140              | -                | -      | -      | -0.087 | -         | -                       | -                                             | -           | 1.96         |
|     | 95% CI   | Low. -0.503        | -                | -      | -      | -0.541 | -         | -                       | -                                             | -           |              |
|     |          | Upp. 0.784         | -                | -      | -      | 0.366  | -         | -                       | -                                             | -           |              |
| M6  | Estimate | 0.134              | -                | -      | -      | -      | -         | -                       | -0.079                                        | -           | 2.00         |
|     | 95% CI   | Low. -0.494        | -                | -      | -      | -      | -         | -                       | -0.544                                        | -           |              |
|     |          | Upp. 0.761         | -                | -      | -      | -      | -         | -                       | 0.386                                         | -           |              |
| M7  | Estimate | 0.137              | -                | -      | -      | -      | 0.018     | -                       | -                                             | -           | 2.10         |
|     | 95% CI   | Low. -0.503        | -                | -      | -      | -      | -0.446    | -                       | -                                             | -           |              |
|     |          | Upp. 0.777         | -                | -      | -      | -      | 0.482     | -                       | -                                             | -           |              |
| M8  | Estimate | 0.131              | -                | -      | -      | -      | -         | -                       | -0.122                                        | 0.201       | 2.66         |
|     | 95% CI   | Low. -0.499        | -                | -      | -      | -      | -         | -                       | -0.600                                        | -0.259      |              |
|     |          | Upp. 0.761         | -                | -      | -      | -      | -         | -                       | 0.356                                         | 0.661       |              |
| M9  | Estimate | 0.136              | -                | -      | -      | -      | -         | -                       | -                                             | 0.179       | 2.94         |
|     | 95% CI   | Low. -0.511        | -                | -      | -      | -      | -         | -                       | -                                             | -0.276      |              |
|     |          | Upp. 0.784         | -                | -      | -      | -      | -         | -                       | -                                             | 0.634       |              |
| M10 | Estimate | 0.138              | -                | -      | -      | -0.062 | -         | 0.069                   | -                                             | 0.153       | 2.97         |
|     | 95% CI   | Low. -0.511        | -                | -      | -      | -0.522 | -         | -0.384                  | -                                             | -0.321      |              |
|     |          | Upp. 0.787         | -                | -      | -      | 0.399  | -         | 0.523                   | -                                             | 0.626       |              |
| M11 | Estimate | 0.136              | -                | -      | -      | -      | 0.033     | -                       | -                                             | 0.182       | 2.98         |
|     | 95% CI   | Low. -0.513        | -                | -      | -      | -      | -0.437    | -                       | -                                             | -0.275      |              |
|     |          | Upp. 0.786         | -                | -      | -      | -      | 0.502     | -                       | -                                             | 0.639       |              |

Table B.3B. [Continued]

|     |          | <i>Intercept</i> | <i>Month (ref: May)</i> |             |               | <i>Deer</i> | <i>Wild boar</i> | <i>Mean height<br/>field layer</i> | <i>Coefficient of variance<br/>of height field layer</i> | <i>Temperature</i> | $\Delta$ AIC |
|-----|----------|------------------|-------------------------|-------------|---------------|-------------|------------------|------------------------------------|----------------------------------------------------------|--------------------|--------------|
|     |          |                  | <i>June</i>             | <i>July</i> | <i>August</i> |             |                  |                                    |                                                          |                    |              |
| M12 | Estimate | -0.936           | 1.505                   | 1.371       | 0.941         | -           | -                | -                                  | -0.144                                                   | -                  | 3.11         |
|     | 95% CI   | Low.             | -2.135                  | 0.110       | -0.047        | -0.468      | -                | -                                  | -0.623                                                   | -                  |              |
|     | Upp.     | 0.263            | 2.899                   | 2.789       | 2.349         | -           | -                | 0.335                              | -                                                        |                    |              |
| M13 | Estimate | -0.995           | 1.630                   | 1.430       | 0.996         | -           | -                | -0.114                             | -                                                        | -                  | 3.23         |
|     | 95% CI   | Low.             | -2.282                  | 0.102       | -0.084        | 0.492       | -                | 0.601                              | -                                                        | -                  |              |
|     | Upp.     | 0.292            | 3.157                   | 2.944       | 2.484         | -           | -                | 0.372                              | -                                                        | -                  |              |
| M14 | Estimate | -0.896           | 1.499                   | 1.308       | 0.897         | -0.088      | -                | -                                  | -                                                        | -                  | 3.31         |
|     | 95% CI   | Low.             | -2.118                  | 0.090       | -0.116        | -0.525      | -0.545           | -                                  | -                                                        | -                  |              |
|     | Upp.     | 0.325            | 2.908                   | 2.732       | 2.319         | 0.369       | -                | -                                  | -                                                        | -                  |              |
| M15 | Estimate | -0.909           | 1.514                   | 1.314       | 0.917         | -           | 0.063            | -                                  | -                                                        | -                  | 3.39         |
|     | 95% CI   | Low.             | -2.132                  | 0.097       | -0.108        | -0.518      | -                | -0.418                             | -                                                        | -                  |              |
|     | Upp.     | 0.314            | 2.932                   | 2.736       | 2.352         | -           | 0.544            | -                                  | -                                                        | -                  |              |
| M16 | Estimate | -1.074           | 1.626                   | 1.616       | 1.080         | -           | -                | -                                  | -                                                        | -0.150             | 3.43         |
|     | 95% CI   | Low.             | -2.496                  | 0.113       | -0.320        | -0.546      | -                | -                                  | -                                                        | -0.791             |              |
|     | Upp.     | 0.348            | 3.138                   | 3.553       | 2.706         | -           | -                | -                                  | -                                                        | 0.492              |              |
| M17 | Estimate | 0.134            | -                       | -           | -             | -           | -                | 0.118                              | -0.087                                                   | -                  | 3.86         |
|     | 95% CI   | Low.             | -0.492                  | -           | -             | -           | -                | -0.317                             | -0.553                                                   | -                  |              |
|     | Upp.     | 0.760            | -                       | -           | -             | -           | -                | 0.552                              | 0.378                                                    | -                  |              |
| M18 | Estimate | 0.140            | -                       | -           | -             | -0.078      | -                | 0.106                              | -                                                        | -                  | 3.88         |
|     | 95% CI   | Low.             | -0.502                  | -           | -             | -0.533      | -                | -0.332                             | -                                                        | -                  |              |
|     | Upp.     | 0.783            | -                       | -           | -             | 0.378       | -                | 0.544                              | -                                                        | -                  |              |
| M19 | Estimate | 0.137            | -                       | -           | -             | -0.093      | -                | -                                  | -0.085                                                   | -                  | 3.98         |
|     | 95% CI   | Low.             | -0.495                  | -           | -             | -0.545      | -                | -                                  | -0.551                                                   | -                  |              |
|     | Upp.     | 0.769            | -                       | -           | -             | 0.360       | -                | -                                  | 0.381                                                    | -                  |              |
| M20 | Estimate | 0.138            | -                       | -           | -             | -           | 0.015            | 0.112                              | -                                                        | -                  | 3.99         |
|     | 95% CI   | Low.             | -0.501                  | -           | -             | -           | -0.449           | -0.324                             | -                                                        | -                  |              |
|     | Upp.     | 0.776            | -                       | -           | -             | -           | 0.479            | 0.549                              | -                                                        | -                  |              |

Table B.3C. Standardized model estimates with 95% confidence intervals for the analysis of the association between the presence of questing *I. ricinus* larvae and ungulate visitation frequencies, for the ungulate species summed. Models presented are the best performing GLMMs with a binomial distribution. The final model selected on which interpretations were based is highlighted in bold. M = model.

|     |          | Intercept          | Month (ref: May) |        |        | Ungulates | Mean height<br>field layer | Coefficient of variance<br>of height field layer | Temperature | $\Delta$ AIC |
|-----|----------|--------------------|------------------|--------|--------|-----------|----------------------------|--------------------------------------------------|-------------|--------------|
|     |          |                    | June             | July   | August |           |                            |                                                  |             |              |
| M1  | Estimate | <b>0.137</b>       | -                | -      | -      | -         | -                          | -                                                | -           | <b>0.00</b>  |
|     | 95% CI   | <b>Low. -0.502</b> | -                | -      | -      | -         | -                          | -                                                | -           |              |
|     |          | <b>Upp. 0.776</b>  | -                | -      | -      | -         | -                          | -                                                | -           |              |
| M2  | Estimate | 0.136              | -                | -      | -      | -         | -                          | 0.179                                            | -           | 0.86         |
|     | 95% CI   | Low. -0.511        | -                | -      | -      | -         | -                          | -0.276                                           | -           |              |
|     |          | Upp. 0.784         | -                | -      | -      | -         | -                          | 0.634                                            | -           |              |
| M3  | Estimate | -0.895             | 1.492            | 1.301  | 0.888  | -         | -                          | -                                                | -           | 1.23         |
|     | 95% CI   | Low. -2.111        | 0.087            | -0.113 | -0.528 | -         | -                          | -                                                | -           |              |
|     |          | Upp. 0.321         | 2.897            | 2.727  | 2.305  | -         | -                          | -                                                | -           |              |
| M4  | Estimate | 0.143              | -                | -      | -      | -0.158    | -                          | -                                                | -           | 1.66         |
|     | 95% CI   | Low. -0.501        | -                | -      | -      | -0.626    | -                          | -                                                | -           |              |
|     |          | Upp. 0.787         | -                | -      | -      | 0.310     | -                          | -                                                | -           |              |
| M5  | Estimate | 0.137              | -                | -      | -      | -         | 0.113                      | -                                                | -           | 1.85         |
|     | 95% CI   | Low. -0.501        | -                | -      | -      | -         | -0.323                     | -                                                | -           |              |
|     |          | Upp. 0.776         | -                | -      | -      | -         | 0.549                      | -                                                | -           |              |
| M6  | Estimate | 0.134              | -                | -      | -      | -         | -                          | -0.079                                           | -           | 2.00         |
|     | 95% CI   | Low. -0.494        | -                | -      | -      | -         | -                          | -0.544                                           | -           |              |
|     |          | Upp. 0.761         | -                | -      | -      | -         | -                          | 0.386                                            | -           |              |
| M7  | Estimate | 0.131              | -                | -      | -      | -         | -                          | -0.122                                           | 0.201       | 2.66         |
|     | 95% CI   | Low. -0.499        | -                | -      | -      | -         | -                          | -0.600                                           | -0.259      |              |
|     |          | Upp. 0.761         | -                | -      | -      | -         | -                          | 0.356                                            | 0.661       |              |
| M8  | Estimate | 0.141              | -                | -      | -      | -0.132    | -                          | -                                                | 0.158       | 2.76         |
|     | 95% CI   | Low. -0.510        | -                | -      | -      | -0.609    | -                          | -                                                | -0.304      |              |
|     |          | Upp. 0.791         | -                | -      | -      | 0.345     | -                          | -                                                | 0.619       |              |
| M9  | Estimate | 0.136              | -                | -      | -      | -         | 0.072                      | -                                                | 0.159       | 2.97         |
|     | 95% CI   | Low. -0.510        | -                | -      | -      | -         | -0.379                     | -                                                | -0.311      |              |
|     |          | Upp. 0.782         | -                | -      | -      | -         | 0.525                      | -                                                | 0.630       |              |
| M10 | Estimate | -0.888             | 1.488            | 1.301  | 0.891  | -0.142    | -                          | -                                                | -           | 3.09         |
|     | 95% CI   | Low. -2.112        | 0.078            | -0.125 | -0.533 | -0.608    | -                          | -                                                | -           |              |
|     |          | Upp. 0.335         | 2.897            | 2.726  | 2.314  | 0.325     | -                          | -                                                | -           |              |
| M11 | Estimate | -0.936             | 1.505            | 1.371  | 0.941  | -         | -                          | -0.144                                           | -           | 3.11         |
|     | 95% CI   | Low. -2.135        | 0.110            | -0.047 | -0.468 | -         | -                          | -0.623                                           | -           |              |
|     |          | Upp. 0.263         | 2.899            | 2.789  | 2.349  | -         | -                          | 0.335                                            | -           |              |

Table B.3C. [Continued]

|     |          | <i>Intercept</i> | <i>Month (ref: May)</i> |             |               | <i>Ungulates</i> | <i>Mean height<br/>field layer</i> | <i>Coefficient of variance<br/>of height field layer</i> | <i>Temperature</i> | <i>ΔAIC</i> |
|-----|----------|------------------|-------------------------|-------------|---------------|------------------|------------------------------------|----------------------------------------------------------|--------------------|-------------|
|     |          |                  | <i>June</i>             | <i>July</i> | <i>August</i> |                  |                                    |                                                          |                    |             |
| M12 | Estimate | -0.995           | 1.630                   | 1.430       | 0.996         | -                | -0.114                             | -                                                        | -                  | 3.24        |
|     | 95% CI   | Low.             | -2.282                  | 0.102       | -0.084        | -0.492           | -                                  | -0.601                                                   | -                  |             |
|     |          | Upp.             | 0.292                   | 3.157       | 2.944         | 2.484            | -                                  | 0.372                                                    | -                  |             |
| M13 | Estimate | -1.074           | 1.626                   | 1.616       | 1.080         | -                | -                                  | -                                                        | -0.150             | 3.43        |
|     | 95% CI   | Low.             | -2.496                  | 0.113       | -0.320        | -0.546           | -                                  | -                                                        | -0.791             |             |
|     |          | Upp.             | 0.348                   | 3.138       | 3.553         | 2.706            | -                                  | -                                                        | 0.492              |             |
| M14 | Estimate | 0.143            | -                       | -           | -             | -0.147           | 0.098                              | -                                                        | -                  | 3.62        |
|     | 95% CI   | Low.             | -0.501                  | -           | -             | -                | -0.617                             | -0.342                                                   | -                  |             |
|     |          | Upp.             | 0.787                   | -           | -             | -                | 0.323                              | 0.537                                                    | -                  |             |
| M15 | Estimate | 0.140            | -                       | -           | -             | -0.165           | -                                  | -0.093                                                   | -                  | 3.65        |
|     | 95% CI   | Low.             | -0.492                  | -           | -             | -                | -0.631                             | -                                                        | -0.560             |             |
|     |          | Upp.             | 0.772                   | -           | -             | -                | 0.301                              | -                                                        | 0.374              |             |
| M16 | Estimate | 0.134            | -                       | -           | -             | -                | 0.118                              | -0.087                                                   | -                  | 3.86        |
|     | 95% CI   | Low.             | -0.492                  | -           | -             | -                | -0.317                             | -0.553                                                   | -                  |             |
|     |          | Upp.             | 0.760                   | -           | -             | -                | -                                  | 0.552                                                    | 0.378              |             |



Table B.4A. Standardized model estimates with 95% confidence intervals for the analysis of the association between the presence of questing *I. ricinus* nymphs and ungulate visitation frequencies. Models presented are the best performing GLMMs with a binomial distribution. The final model selected on which interpretations were based is highlighted in bold. M = model.

|     |             | Intercept | Month (ref: May) |      |        | Fallow deer | Roe deer | Red deer | Moose | Wild boar | Mean height field layer | Coefficient of variance of height field layer | Temperature | $\Delta$ AIC |
|-----|-------------|-----------|------------------|------|--------|-------------|----------|----------|-------|-----------|-------------------------|-----------------------------------------------|-------------|--------------|
|     |             |           | June             | July | August |             |          |          |       |           |                         |                                               |             |              |
| M1  | Estimate    | 0.812     | -                | -    | -      | -           | -        | 0.453    | -     | -         | -0.430                  | -                                             | 0.00        |              |
|     | 95% CI Low. | 0.263     | -                | -    | -      | -           | -        | -0.093   | -     | -         | -0.876                  | -                                             |             |              |
|     | Upp.        | 1.361     | -                | -    | -      | -           | -        | 1.000    | -     | -         | 0.017                   | -                                             |             |              |
| M2  | Estimate    | 0.836     | -                | -    | -      | -           | 0.353    | 0.449    | -     | -         | -0.400                  | -                                             | 0.50        |              |
|     | 95% CI Low. | 0.291     | -                | -    | -      | -           | -0.229   | -0.095   | -     | -         | -0.841                  | -                                             |             |              |
|     | Upp.        | 1.381     | -                | -    | -      | -           | 0.934    | 0.993    | -     | -         | 0.043                   | -                                             |             |              |
| M3  | Estimate    | 0.828     | -                | -    | -      | -0.316      | -        | 0.449    | -     | -         | -0.420                  | -                                             | 0.75        |              |
|     | 95% CI Low. | 0.298     | -                | -    | -      | -0.844      | -        | -0.106   | -     | -         | -0.862                  | -                                             |             |              |
|     | Upp.        | 1.358     | -                | -    | -      | 0.212       | -        | 1.003    | -     | -         | 0.023                   | -                                             |             |              |
| M4  | Estimate    | 0.767     | -                | -    | -      | -           | -        | -        | -     | -         | -0.444                  | -                                             | 1.16        |              |
|     | 95% CI Low. | 0.257     | -                | -    | -      | -           | -        | -        | -     | -         | -0.885                  | -                                             |             |              |
|     | Upp.        | 1.278     | -                | -    | -      | -           | -        | -        | -     | -         | -0.003                  | -                                             |             |              |
| M5  | Estimate    | 0.817     | -                | -    | -      | -           | -        | 0.472    | -     | -         | -                       | -                                             | 1.38        |              |
|     | 95% CI Low. | 0.222     | -                | -    | -      | -           | -        | -0.073   | -     | -         | -                       | -                                             |             |              |
|     | Upp.        | 1.412     | -                | -    | -      | -           | -        | 1.017    | -     | -         | -                       | -                                             |             |              |
| M6  | Estimate    | 0.838     | -                | -    | -      | -           | 0.388    | 0.471    | -     | -         | -                       | -                                             | 1.43        |              |
|     | 95% CI Low. | 0.259     | -                | -    | -      | -           | -0.184   | -0.072   | -     | -         | -                       | -                                             |             |              |
|     | Upp.        | 1.418     | -                | -    | -      | -           | 0.960    | 1.013    | -     | -         | -                       | -                                             |             |              |
| M7  | Estimate    | 0.812     | -                | -    | -      | -           | -        | 0.448    | -     | -         | -0.400                  | -0.166                                        | 1.43        |              |
|     | 95% CI Low. | 0.273     | -                | -    | -      | -           | -        | -0.099   | -     | -         | -0.851                  | -0.608                                        |             |              |
|     | Upp.        | 1.350     | -                | -    | -      | -           | -        | 0.995    | -     | -         | 0.051                   | 0.276                                         |             |              |
| M8  | Estimate    | 0.856     | -                | -    | -      | -0.301      | 0.335    | 0.452    | -     | -         | -0.388                  | -                                             | 1.47        |              |
|     | 95% CI Low. | 0.320     | -                | -    | -      | -0.839      | -0.246   | -0.099   | -     | -         | -0.829                  | -                                             |             |              |
|     | Upp.        | 1.393     | -                | -    | -      | 0.236       | 0.915    | 1.004    | -     | -         | 0.053                   | -                                             |             |              |
| M9  | Estimate    | 0.791     | -                | -    | -      | -           | 0.345    | -        | -     | -         | -0.415                  | -                                             | 1.57        |              |
|     | 95% CI Low. | 0.286     | -                | -    | -      | -           | -0.226   | -        | -     | -         | -0.850                  | -                                             |             |              |
|     | Upp.        | 1.296     | -                | -    | -      | -           | 0.935    | -        | -     | -         | 0.020                   | -                                             |             |              |
| M10 | Estimate    | 0.810     | -                | -    | -      | -           | -        | 0.453    | -     | -0.154    | -0.425                  | -                                             | 1.70        |              |
|     | 95% CI Low. | 0.265     | -                | -    | -      | -           | -        | -0.091   | -     | -0.588    | -0.871                  | -                                             |             |              |
|     | Upp.        | 1.354     | -                | -    | -      | -           | -        | 0.998    | -     | 0.281     | 0.022                   | -                                             |             |              |
| M11 | Estimate    | 0.777     | -                | -    | -      | -0.322      | -        | -        | -     | -         | -0.434                  | -                                             | 1.72        |              |
|     | 95% CI Low. | 0.292     | -                | -    | -      | -0.834      | -        | -        | -     | -         | -0.868                  | -                                             |             |              |
|     | Upp.        | 1.262     | -                | -    | -      | 0.189       | -        | -        | -     | -         | 0.001                   | -                                             |             |              |

Table B.4A. [Continued]

|     |             | <i>Intercept</i> | <i>Month (ref: May)</i> |             |               | <i>Fallow deer</i> | <i>Roe deer</i> | <i>Red deer</i> | <i>Moose</i> | <i>Wild boar</i> | <i>Mean height field layer</i> | <i>Coefficient of variance of height field layer</i> | <i>Temperature</i> | $\Delta$ AIC |
|-----|-------------|------------------|-------------------------|-------------|---------------|--------------------|-----------------|-----------------|--------------|------------------|--------------------------------|------------------------------------------------------|--------------------|--------------|
|     |             |                  | <i>June</i>             | <i>July</i> | <i>August</i> |                    |                 |                 |              |                  |                                |                                                      |                    |              |
| M12 | Estimate    | 0.820            | -                       | -           | -             | -                  | -0.148          | -               | 0.466        | -                | -                              | -0.431                                               | -                  | 1.76         |
|     | 95% CI Low. | 0.257            | -                       | -           | -             | -                  | -0.597          | -               | -0.086       | -                | -                              | -0.880                                               | -                  |              |
|     | Upp.        | 1.384            | -                       | -           | -             | -                  | 0.301           | -               | 1.018        | -                | -                              | 0.018                                                | -                  |              |
| M13 | Estimate    | 0.835            | -                       | -           | -             | -                  | -               | 0.361           | 0.444        | -                | -                              | -0.365                                               | -0.186             | 1.83         |
|     | 95% CI Low. | 0.301            | -                       | -           | -             | -                  | -               | -0.211          | -0.010       | -                | -                              | -0.813                                               | -0.627             |              |
|     | Upp.        | 1.368            | -                       | -           | -             | -                  | -               | 0.934           | 0.988        | -                | -                              | 0.082                                                | 0.256              |              |
| M14 | Estimate    | 0.833            | -                       | -           | -             | -0.352             | -               | -               | 0.443        | -                | -                              | -0.380                                               | -0.210             | 1.86         |
|     | 95% CI Low. | 0.312            | -                       | -           | -             | -0.884             | -               | -               | -0.113       | -                | -                              | -0.828                                               | -0.648             |              |
|     | Upp.        | 1.353            | -                       | -           | -             | 0.179              | -               | -               | 0.998        | -                | -                              | 0.067                                                | 0.227              |              |
| M15 | Estimate    | 0.826            | -                       | -           | -             | -0.329             | -               | -               | 0.469        | -                | -                              | -                                                    | -                  | 2.02         |
|     | 95% CI Low. | 0.263            | -                       | -           | -             | -0.860             | -               | -               | -0.082       | -                | -                              | -                                                    | -                  |              |
|     | Upp.        | 1.390            | -                       | -           | -             | 0.202              | -               | -               | 1.020        | -                | -                              | -                                                    | -                  |              |
| M16 | Estimate    | 0.839            | -                       | -           | -             | -                  | -               | 0.398           | 0.464        | -                | -                              | -                                                    | -0.250             | 2.05         |
|     | 95% CI Low. | 0.278            | -                       | -           | -             | -                  | -               | -0.166          | -0.078       | -                | -                              | -                                                    | -0.687             |              |
|     | Upp.        | 1.399            | -                       | -           | -             | -                  | -               | 0.962           | 1.006        | -                | -                              | -                                                    | 0.188              |              |
| M17 | Estimate    | 0.824            | -                       | -           | -             | -0.362             | -               | -               | 0.449        | -                | -0.210                         | -0.410                                               | -                  | 2.09         |
|     | 95% CI Low. | 0.305            | -                       | -           | -             | -0.895             | -               | -               | -0.103       | -                | -0.646                         | -0.852                                               | -                  |              |
|     | Upp.        | 1.344            | -                       | -           | -             | 0.171              | -               | -               | 1.001        | -                | 0.226                          | 0.031                                                | -                  |              |
| M18 | Estimate    | 0.819            | -                       | -           | -             | -                  | -               | -               | 0.466        | -                | -                              | -                                                    | -0.234             | 2.11         |
|     | 95% CI Low. | 0.241            | -                       | -           | -             | -                  | -               | -               | -0.080       | -                | -                              | -                                                    | -0.674             |              |
|     | Upp.        | 1.396            | -                       | -           | -             | -                  | -               | -               | 1.012        | -                | -                              | -                                                    | 0.206              |              |
| M19 | Estimate    | 0.814            | -                       | -           | -             | -                  | -               | -               | 0.457        | 0.051            | -                              | -0.422                                               | -                  | 2.14         |
|     | 95% CI Low. | 0.261            | -                       | -           | -             | -                  | -               | -               | -0.091       | -0.417           | -                              | -0.875                                               | -                  |              |
|     | Upp.        | 1.367            | -                       | -           | -             | -                  | -               | -               | 1.004        | 0.518            | -                              | 0.030                                                | -                  |              |
| M20 | Estimate    | 0.850            | -                       | -           | -             | -                  | -0.164          | 0.367           | 0.465        | -                | -                              | -0.400                                               | -                  | 2.21         |
|     | 95% CI Low. | 0.285            | -                       | -           | -             | -                  | -0.616          | -0.224          | -0.085       | -                | -                              | -0.846                                               | -                  |              |
|     | Upp.        | 1.415            | -                       | -           | -             | -                  | 0.288           | 0.958           | 1.015        | -                | -                              | 0.046                                                | -                  |              |
| M21 | Estimate    | 0.845            | -                       | -           | -             | -0.319             | -               | 0.375           | 0.474        | -                | -                              | -                                                    | -                  | 2.23         |
|     | 95% CI Low. | 0.295            | -                       | -           | -             | -0.857             | -               | -0.195          | -0.075       | -                | -                              | -                                                    | -                  |              |
|     | Upp.        | 1.414            | -                       | -           | -             | 0.219              | -               | 0.945           | 1.023        | -                | -                              | -                                                    | -                  |              |
| M22 | Estimate    | 0.834            | -                       | -           | -             | -0.375             | -               | -               | 0.462        | -                | -                              | -                                                    | -0.278             | 2.28         |
|     | 95% CI Low. | 0.286            | -                       | -           | -             | -0.907             | -               | -               | -0.092       | -                | -                              | -                                                    | -0.713             |              |
|     | Upp.        | 1.382            | -                       | -           | -             | 0.155              | -               | -               | 1.015        | -                | -                              | -                                                    | 0.156              |              |
| M23 | Estimate    | 0.817            | -                       | -           | -             | -                  | -               | -0.132          | 0.464        | -                | -0.140                         | -0.426                                               | -                  | 2.33         |
|     | 95% CI Low. | 0.259            | -                       | -           | -             | -                  | -               | -0.584          | -0.086       | -                | -0.582                         | -0.875                                               | -                  |              |
|     | Upp.        | 1.375            | -                       | -           | -             | -                  | -               | 0.319           | 1.013        | -                | 0.301                          | 0.024                                                | -                  |              |

Table B.4A. [Continued]

|     |                 | Intercept    | Month (ref: May) |      |        | Fallow deer | Roe deer | Red deer | Moose  | Wild boar | Mean height<br>field layer | Coefficient of variance<br>of height field layer | Temperature | AAIC   |
|-----|-----------------|--------------|------------------|------|--------|-------------|----------|----------|--------|-----------|----------------------------|--------------------------------------------------|-------------|--------|
|     |                 |              | June             | July | August |             |          |          |        |           |                            |                                                  |             |        |
| M24 | Estimate        | 0.864        | -                | -    | -      | -0.371      | -        | 0.390    | 0.468  | -         | -                          | -0.295                                           | 2.36        |        |
|     | 95% CI          | Low.         | 0.321            | -    | -      | -           | -0.910   | -        | -0.174 | -0.082    | -                          | -                                                | -0.729      |        |
|     |                 | Upp.         | 1.407            | -    | -      | -           | 0.168    | -        | 0.953  | 1.018     | -                          | -                                                | 0.139       |        |
| M25 | Estimate        | 0.863        | -                | -    | -      | -0.345      | -        | 0.348    | 0.448  | -         | -                          | -0.344                                           | 2.45        |        |
|     | 95% CI          | Low.         | 0.336            | -    | -      | -           | -0.888   | -        | -0.223 | -0.104    | -                          | -0.791                                           | -0.670      |        |
|     |                 | Upp.         | 1.389            | -    | -      | -           | 0.199    | -        | 0.919  | 1.001     | -                          | 0.103                                            | 0.209       |        |
| M26 | Estimate        | 0.803        | -                | -    | -      | -0.295      | -        | 0.323    | -      | -         | -                          | -0.404                                           | 2.48        |        |
|     | 95% CI          | Low.         | 0.312            | -    | -      | -           | -0.817   | -        | -0.255 | -         | -                          | -0.836                                           | -           |        |
|     |                 | Upp.         | 1.293            | -    | -      | -           | 0.226    | -        | 0.900  | -         | -                          | 0.028                                            | -           |        |
| M27 | Estimate        | 0.766        | -                | -    | -      | -           | -        | -        | -      | -         | -                          | -0.414                                           | 2.48        |        |
|     | 95% CI          | Low.         | 0.267            | -    | -      | -           | -        | -        | -      | -         | -                          | -0.860                                           | -0.606      |        |
|     |                 | Upp.         | 1.266            | -    | -      | -           | -        | -        | -      | -         | -                          | 0.031                                            | 0.258       |        |
| M28 | Estimate        | 0.834        | -                | -    | -      | -0.308      | -0.130   | -        | 0.462  | -         | -                          | -0.419                                           | 2.64        |        |
|     | 95% CI          | Low.         | 0.292            | -    | -      | -           | -0.840   | -0.572   | -      | -0.080    | -                          | -                                                | -0.865      | -      |
|     |                 | Upp.         | 1.377            | -    | -      | -           | 0.223    | 0.313    | -      | 1.021     | -                          | -                                                | 0.026       | -      |
| M29 | Estimate        | 0.780        | -                | -    | -      | -0.356      | -        | -        | -      | -         | -                          | -0.394                                           | 2.70        |        |
|     | 95% CI          | Low.         | 0.306            | -    | -      | -           | -0.868   | -        | -      | -         | -                          | -0.834                                           | -0.641      |        |
|     |                 | Upp.         | 1.254            | -    | -      | -           | 0.156    | -        | -      | -         | -                          | 0.044                                            | 0.210       |        |
| M30 | Estimate        | 0.837        | -                | -    | -      | -           | -        | 0.351    | 0.450  | 0.023     | -                          | -0.396                                           | 2.72        |        |
|     | 95% CI          | Low.         | 0.290            | -    | -      | -           | -        | -        | -0.232 | -0.094    | -0.441                     | -                                                | -0.843      | -      |
|     |                 | Upp.         | 1.384            | -    | -      | -           | -        | -        | 0.933  | 0.995     | 0.487                      | -                                                | 0.051       | -      |
| M31 | Estimate        | 0.788        | -                | -    | -      | -           | -        | 0.360    | -      | -         | -                          | -0.382                                           | 2.81        |        |
|     | 95% CI          | Low.         | 0.295            | -    | -      | -           | -        | -        | -0.209 | -         | -                          | -                                                | -0.821      | -0.620 |
|     |                 | Upp.         | 1.282            | -    | -      | -           | -        | -        | 0.929  | -         | -                          | -                                                | 0.058       | 0.241  |
| M32 | Estimate        | 0.769        | -                | -    | -      | -           | -        | -        | -      | -         | -0.147                     | -                                                | 2.84        |        |
|     | 95% CI          | Low.         | 0.257            | -    | -      | -           | -        | -        | -      | -         | -                          | -0.574                                           | -           |        |
|     |                 | Upp.         | 1.280            | -    | -      | -           | -        | -        | -      | -         | -                          | 0.279                                            | 0.004       | -      |
| M33 | <b>Estimate</b> | <b>0.774</b> | -                | -    | -      | -           | -        | -        | -      | -         | -                          | -                                                | <b>2.86</b> |        |
|     | <b>95% CI</b>   | <b>Low.</b>  | <b>0.209</b>     | -    | -      | -           | -        | -        | -      | -         | -                          | -                                                | -           |        |
|     |                 | <b>Upp.</b>  | <b>1.339</b>     | -    | -      | -           | -        | -        | -      | -         | -                          | -                                                | -           |        |
| M34 | Estimate        | 0.793        | -                | -    | -      | -           | -        | 0.384    | -      | -         | -                          | -                                                | 2.87        |        |
|     | 95% CI          | Low.         | 0.246            | -    | -      | -           | -        | -        | -0.185 | -         | -                          | -                                                | -           |        |
|     |                 | Upp.         | 1.340            | -    | -      | -           | -        | -        | 0.953  | -         | -                          | -                                                | -           |        |
| M35 | Estimate        | 0.829        | -                | -    | -      | -0.317      | -        | -        | 0.452  | 0.051     | -                          | -0.412                                           | 2.93        |        |
|     | 95% CI          | Low.         | 0.296            | -    | -      | -           | -0.847   | -        | -      | -0.103    | -0.406                     | -                                                | -0.860      | -      |
|     |                 | Upp.         | 1.362            | -    | -      | -           | 0.212    | -        | -      | 1.007     | 0.507                      | -                                                | 0.035       | -      |

Table B.4A. [Continued]

|     |             | Intercept | Month (ref: May) |      |        | Fallow deer | Roe deer | Red deer | Moose  | Wild boar | Mean height field layer | Coefficient of variance of height field layer | Temperature | $\Delta$ AIC |
|-----|-------------|-----------|------------------|------|--------|-------------|----------|----------|--------|-----------|-------------------------|-----------------------------------------------|-------------|--------------|
|     |             |           | June             | July | August |             |          |          |        |           |                         |                                               |             |              |
| M36 | Estimate    | 0.816     | -                | -    | -      | -           | -        | 0.471    | -      | -0.171    | -                       | -                                             | 2.95        |              |
|     | 95% CI Low. | 0.225     | -                | -    | -      | -           | -        | -0.073   | -      | -0.613    | -                       | -                                             |             |              |
|     | Upp.        | 1.408     | -                | -    | -      | -           | -        | 1.015    | -      | 0.270     | -                       | -                                             |             |              |
| M37 | Estimate    | 0.853     | -                | -    | -      | -0.347      | -        | 0.321    | 0.455  | -0.194    | -0.380                  | -                                             | 2.96        |              |
|     | 95% CI Low. | 0.325     | -                | -    | -      | -0.891      | -        | -0.258   | -0.095 | -0.629    | -0.821                  | -                                             |             |              |
|     | Upp.        | 1.381     | -                | -    | -      | 0.196       | -        | 0.900    | 1.005  | 0.240     | 0.061                   | -                                             |             |              |
| M38 | Estimate    | 0.773     | -                | -    | -      | -           | -0.120   | -        | -      | -         | -0.444                  | -                                             | 3.01        |              |
|     | 95% CI Low. | 0.252     | -                | -    | -      | -           | -0.556   | -        | -      | -         | -0.887                  | -                                             |             |              |
|     | Upp.        | 1.295     | -                | -    | -      | -           | 0.317    | -        | -      | -         | -0.001                  | -                                             |             |              |
| M39 | Estimate    | 0.853     | -                | -    | -      | -           | -0.172   | 0.401    | 0.484  | -         | -                       | -                                             | 3.05        |              |
|     | 95% CI Low. | 0.251     | -                | -    | -      | -           | -0.628   | -0.178   | -0.063 | -         | -                       | -                                             |             |              |
|     | Upp.        | 1.453     | -                | -    | -      | -           | 0.283    | 0.981    | 1.031  | -         | -                       | -                                             |             |              |
| M40 | Estimate    | 0.778     | -                | -    | -      | -0.364      | -        | -        | -      | -0.198    | -0.425                  | -                                             | 3.06        |              |
|     | 95% CI Low. | 0.297     | -                | -    | -      | -0.882      | -        | -        | -      | -0.621    | -0.860                  | -                                             |             |              |
|     | Upp.        | 1.258     | -                | -    | -      | 0.154       | -        | -        | -      | 0.225     | 0.011                   | -                                             |             |              |
| M41 | Estimate    | 0.825     | -                | -    | -      | -           | -0.154   | -        | 0.483  | -         | -                       | -                                             | 3.07        |              |
|     | 95% CI Low. | 0.215     | -                | -    | -      | -           | -0.605   | -        | -0.066 | -         | -                       | -                                             |             |              |
|     | Upp.        | 1.435     | -                | -    | -      | -           | 0.296    | -        | 1.032  | -         | -                       | -                                             |             |              |
| M42 | Estimate    | 0.837     | -                | -    | -      | -           | -        | 0.379    | 0.471  | -0.153    | -                       | -                                             | 3.14        |              |
|     | 95% CI Low. | 0.260     | -                | -    | -      | -           | -        | -0.193   | -0.071 | -0.589    | -                       | -                                             |             |              |
|     | Upp.        | 1.415     | -                | -    | -      | -           | -        | 0.951    | 1.013  | 0.283     | -                       | -                                             |             |              |
| M43 | Estimate    | 0.824     | -                | -    | -      | -0.381      | -        | -        | 0.468  | -0.228    | -                       | -                                             | 3.17        |              |
|     | 95% CI Low. | 0.271     | -                | -    | -      | -0.919      | -        | -        | -0.082 | -0.668    | -                       | -                                             |             |              |
|     | Upp.        | 1.377     | -                | -    | -      | 0.157       | -        | -        | 1.018  | 0.212     | -                       | -                                             |             |              |
| M44 | Estimate    | 0.821     | -                | -    | -      | -           | -0.156   | -        | 0.461  | -         | -0.399                  | -0.176                                        | 3.18        |              |
|     | 95% CI Low. | 0.269     | -                | -    | -      | -           | -0.604   | -        | -0.091 | -         | -0.853                  | -0.624                                        |             |              |
|     | Upp.        | 1.373     | -                | -    | -      | -           | 0.291    | -        | 1.014  | -         | 0.055                   | 0.272                                         |             |              |
| M45 | Estimate    | 0.821     | -                | -    | -      | -           | -        | 0.480    | 0.126  | -         | -                       | -                                             | 3.25        |              |
|     | 95% CI Low. | 0.220     | -                | -    | -      | -           | -        | -0.066   | -0.346 | -         | -                       | -                                             |             |              |
|     | Upp.        | 1.422     | -                | -    | -      | -           | -        | 1.026    | 0.598  | -         | -                       | -                                             |             |              |
| M46 | Estimate    | 0.768     | -                | -    | -      | -           | -        | -        | 0.020  | -         | -0.441                  | -                                             | 3.30        |              |
|     | 95% CI Low. | 0.255     | -                | -    | -      | -           | -        | -        | -0.433 | -         | -0.887                  | -                                             |             |              |
|     | Upp.        | 1.282     | -                | -    | -      | -           | -        | -        | 0.474  | -         | 0.005                   | -                                             |             |              |
| M47 | Estimate    | 0.868     | -                | -    | -      | -0.294      | -0.149   | 0.351    | 0.469  | -         | -0.388                  | -                                             | 3.30        |              |
|     | 95% CI Low. | 0.315     | -                | -    | -      | -0.836      | -0.596   | -0.241   | -0.089 | -         | -0.832                  | -                                             |             |              |
|     | Upp.        | 1.422     | -                | -    | -      | 0.247       | 0.298    | 0.942    | 1.026  | -         | 0.056                   | -                                             |             |              |

Table B.4A. [Continued]

|     |             | Intercept | Month (ref: May) |      |        | Fallow deer | Roe deer | Red deer | Moose  | Wild boar | Mean height field layer | Coefficient of variance of height field layer | Temperature | ΔAIC |
|-----|-------------|-----------|------------------|------|--------|-------------|----------|----------|--------|-----------|-------------------------|-----------------------------------------------|-------------|------|
|     |             |           | June             | July | August |             |          |          |        |           |                         |                                               |             |      |
| M48 | Estimate    | 0.776     | -                | -    | -      | -0.333      | -        | -        | -      | -         | -                       | -                                             | 3.35        |      |
|     | 95% CI Low. | 0.252     | -                | -    | -      | -0.852      | -        | -        | -      | -         | -                       | -                                             |             |      |
|     | Upp.        | 1.301     | -                | -    | -      | 0.185       | -        | -        | -      | -         | -                       | -                                             |             |      |
| M49 | Estimate    | 0.806     | -                | -    | -      | -0.336      | -        | 0.331    | -      | -         | -0.360                  | -0.231                                        | 3.36        |      |
|     | 95% CI Low. | 0.326     | -                | -    | -      | -0.859      | -        | -0.234   | -      | -         | -0.798                  | -0.658                                        |             |      |
|     | Upp.        | 1.285     | -                | -    | -      | 0.188       | -        | 0.894    | -      | -         | 0.077                   | 0.197                                         |             |      |
| M50 | Estimate    | 0.810     | -                | -    | -      | -           | -        | 0.450    | -      | -0.129    | -0.400                  | -0.144                                        | 3.37        |      |
|     | 95% CI Low. | 0.275     | -                | -    | -      | -           | -        | -0.096   | -      | -0.567    | -0.851                  | -0.594                                        |             |      |
|     | Upp.        | 1.345     | -                | -    | -      | -           | -        | 0.995    | -      | 0.309     | 0.051                   | 0.306                                         |             |      |
| M51 | Estimate    | 0.792     | -                | -    | -      | -           | -        | 0.392    | -      | -         | -                       | -0.254                                        | 3.38        |      |
|     | 95% CI Low. | 0.265     | -                | -    | -      | -           | -        | -0.168   | -      | -         | -                       | -0.683                                        |             |      |
|     | Upp.        | 1.319     | -                | -    | -      | -           | -        | 0.952    | -      | -         | -                       | 0.176                                         |             |      |
| M52 | Estimate    | 0.792     | -                | -    | -      | -           | -        | 0.345    | -      | -         | -0.411                  | -                                             | 3.40        |      |
|     | 95% CI Low. | 0.285     | -                | -    | -      | -           | -        | -0.235   | -      | -         | -0.848                  | -                                             |             |      |
|     | Upp.        | 1.299     | -                | -    | -      | -           | -        | 0.926    | -      | -         | 0.025                   | -                                             |             |      |
| M53 | Estimate    | 0.801     | -                | -    | -      | -           | -0.131   | 0.364    | -      | -         | -0.414                  | -                                             | 3.41        |      |
|     | 95% CI Low. | 0.281     | -                | -    | -      | -           | -0.569   | -0.224   | -      | -         | -0.852                  | -                                             |             |      |
|     | Upp.        | 1.321     | -                | -    | -      | -           | 0.307    | 0.951    | -      | -         | 0.023                   | -                                             |             |      |
| M54 | Estimate    | 0.781     | -                | -    | -      | -0.378      | -        | -        | -      | -         | -                       | -0.283                                        | 3.46        |      |
|     | 95% CI Low. | 0.274     | -                | -    | -      | -0.892      | -        | -        | -      | -         | -                       | -0.708                                        |             |      |
|     | Upp.        | 1.288     | -                | -    | -      | 0.137       | -        | -        | -      | -         | -                       | 0.142                                         |             |      |
| M55 | Estimate    | 0.774     | -                | -    | -      | -           | -        | -        | -      | -         | -                       | -0.240                                        | 3.47        |      |
|     | 95% CI Low. | 0.228     | -                | -    | -      | -           | -        | -        | -      | -         | -                       | -0.672                                        |             |      |
|     | Upp.        | 1.321     | -                | -    | -      | -           | -        | -        | -      | -         | -                       | 0.192                                         |             |      |
| M56 | Estimate    | 0.841     | -                | -    | -      | -           | -        | 0.378    | 0.476  | 0.088     | -                       | -                                             | 3.48        |      |
|     | 95% CI Low. | 0.256     | -                | -    | -      | -           | -        | -0.196   | -0.068 | -0.380    | -                       | -                                             |             |      |
|     | Upp.        | 1.426     | -                | -    | -      | -           | -        | 0.952    | 1.019  | 0.557     | -                       | -                                             |             |      |
| M57 | Estimate    | 0.849     | -                | -    | -      | -           | -0.174   | 0.377    | 0.461  | -         | -0.364                  | -0.198                                        | 3.51        |      |
|     | 95% CI Low. | 0.297     | -                | -    | -      | -           | -0.624   | -0.205   | -0.090 | -         | -0.815                  | -0.646                                        |             |      |
|     | Upp.        | 1.401     | -                | -    | -      | -           | 0.276    | 0.959    | 1.011  | -         | 0.086                   | 0.251                                         |             |      |
| M58 | Estimate    | 0.829     | -                | -    | -      | -0.388      | -        | 0.445    | -      | -0.183    | -0.378                  | -0.184                                        | 3.52        |      |
|     | 95% CI Low. | 0.317     | -                | -    | -      | -0.922      | -        | -0.108   | -      | 0.619     | -0.824                  | -0.627                                        |             |      |
|     | Upp.        | 1.340     | -                | -    | -      | 0.147       | -        | 0.998    | -      | 0.254     | 0.069                   | 0.258                                         |             |      |
| M59 | Estimate    | 0.853     | -                | -    | -      | -0.369      | -        | 0.362    | 0.476  | -         | -0.210                  | -                                             | 3.56        |      |
|     | 95% CI Low. | 0.302     | -                | -    | -      | -0.915      | -        | -0.208   | -0.072 | -         | -0.648                  | -                                             |             |      |
|     | Upp.        | 1.404     | -                | -    | -      | 0.176       | -        | 0.932    | 1.023  | -         | 0.227                   | -                                             |             |      |

Table B.4A. [Continued]

|     |             | Intercept | Month (ref: May) |      |        | Fallow deer | Roe deer | Red deer | Moose  | Wild boar | Mean height field layer | Coefficient of variance of height field layer | Temperature | ΔAIC |
|-----|-------------|-----------|------------------|------|--------|-------------|----------|----------|--------|-----------|-------------------------|-----------------------------------------------|-------------|------|
|     |             |           | June             | July | August |             |          |          |        |           |                         |                                               |             |      |
| M60 | Estimate    | 0.817     | -                | -    | -      | -0.132      | -        | 0.464    | -      | -0.140    | -0.426                  | -                                             | 3.59        |      |
|     | 95% CI Low. | 0.259     | -                | -    | -      | -0.584      | -        | -0.086   | -      | -0.582    | -0.875                  | -                                             |             |      |
|     | 95% CI Upp. | 1.375     | -                | -    | -      | 0.319       | -        | 1.013    | -      | 0.301     | 0.024                   | -                                             |             |      |
| M61 | Estimate    | 0.814     | -                | -    | -      | -           | -        | 0.451    | 0.061  | -         | -0.391                  | -0.170                                        | 3.59        |      |
|     | 95% CI Low. | 0.271     | -                | -    | -      | -           | -        | -0.095   | -0.404 | -         | -0.849                  | -0.615                                        |             |      |
|     | 95% CI Upp. | 1.357     | -                | -    | -      | -           | -        | 0.998    | 0.526  | -         | 0.068                   | 0.274                                         |             |      |
| M62 | Estimate    | 0.806     | -                | -    | -      | -0.361      | -        | 0.371    | -      | -         | -                       | -0.296                                        | 3.63        |      |
|     | 95% CI Low. | 0.304     | -                | -    | -      | -0.883      | -        | -0.185   | -      | -         | -                       | -0.720                                        |             |      |
|     | 95% CI Upp. | 1.308     | -                | -    | -      | 0.160       | -        | 0.927    | -      | -         | -                       | 0.128                                         |             |      |
| M63 | Estimate    | 0.853     | -                | -    | -      | -           | -0.183   | 0.412    | 0.478  | -         | -                       | -0.261                                        | 3.63        |      |
|     | 95% CI Low. | 0.272     | -                | -    | -      | -           | -0.636   | -0.160   | -0.070 | -         | -                       | -0.075                                        |             |      |
|     | 95% CI Upp. | 1.434     | -                | -    | -      | -           | 0.270    | 0.984    | 1.027  | -         | -                       | 0.183                                         |             |      |
| M64 | Estimate    | 0.800     | -                | -    | -      | -0.311      | -        | 0.360    | -      | -         | -                       | -                                             | 3.64        |      |
|     | 95% CI Low. | 0.280     | -                | -    | -      | -0.836      | -        | -0.205   | -      | -         | -                       | -                                             |             |      |
|     | 95% CI Upp. | 1.320     | -                | -    | -      | 0.214       | -        | 0.926    | -      | -         | -                       | -                                             |             |      |
| M65 | Estimate    | 0.781     | -                | -    | -      | -0.315      | -0.096   | -        | -      | -         | -0.432                  | -                                             | 3.71        |      |
|     | 95% CI Low. | 0.288     | -                | -    | -      | -0.831      | -0.526   | -        | -      | -         | -0.869                  | -                                             |             |      |
|     | 95% CI Upp. | 1.274     | -                | -    | -      | 0.200       | 0.333    | -        | -      | -         | 0.004                   | -                                             |             |      |
| M66 | Estimate    | 0.857     | -                | -    | -      | -0.302      | -        | 0.332    | 0.454  | 0.024     | -                       | -0.385                                        | 3.72        |      |
|     | 95% CI Low. | 0.319     | -                | -    | -      | -0.840      | -        | -0.250   | -0.099 | -0.432    | -                       | -0.830                                        |             |      |
|     | 95% CI Upp. | 1.394     | -                | -    | -      | 0.236       | -        | 0.914    | 1.007  | 0.479     | -                       | 0.060                                         |             |      |
| M67 | Estimate    | 0.839     | -                | -    | -      | -0.347      | -0.140   | -        | 0.457  | -         | -                       | -0.378                                        | -0.221      | 3.73 |
|     | 95% CI Low. | 0.308     | -                | -    | -      | -0.881      | -0.580   | -        | -0.105 | -         | -                       | -0.828                                        | -0.664      |      |
|     | 95% CI Upp. | 1.371     | -                | -    | -      | 0.188       | 0.300    | -        | 1.019  | -         | -                       | 0.072                                         | 0.223       |      |
| M68 | Estimate    | 0.791     | -                | -    | -      | -           | -        | 0.355    | -      | -0.006    | -                       | -0.416                                        | -           | 3.76 |
|     | 95% CI Low. | 0.286     | -                | -    | -      | -           | -        | -0.227   | -      | -0.455    | -                       | -0.854                                        | -           |      |
|     | 95% CI Upp. | 1.296     | -                | -    | -      | -           | -        | 0.937    | -      | 0.443     | -                       | 0.022                                         | -           |      |
| M69 | Estimate    | 0.827     | -                | -    | -      | -           | -0.165   | -        | 0.477  | -         | -                       | -0.244                                        | 3.77        |      |
|     | 95% CI Low. | 0.235     | -                | -    | -      | -           | -0.614   | -        | -0.074 | -         | -                       | -0.688                                        |             |      |
|     | 95% CI Upp. | 1.419     | -                | -    | -      | -           | 0.284    | -        | 1.028  | -         | -                       | 0.200                                         |             |      |
| M70 | Estimate    | 0.834     | -                | -    | -      | -0.325      | -0.139   | -        | 0.480  | -         | -                       | -                                             | 3.82        |      |
|     | 95% CI Low. | 0.257     | -                | -    | -      | -0.861      | -0.583   | -        | -0.075 | -         | -                       | -                                             |             |      |
|     | 95% CI Upp. | 1.410     | -                | -    | -      | 0.212       | 0.304    | -        | 1.035  | -         | -                       | -                                             |             |      |
| M71 | Estimate    | 0.812     | -                | -    | -      | -           | -        | -        | 0.456  | 0.052     | -0.155                  | -0.417                                        | 3.88        |      |
|     | 95% CI Low. | 0.263     | -                | -    | -      | -           | -        | -        | -0.089 | -0.416    | -0.591                  | -0.870                                        |             |      |
|     | 95% CI Upp. | 1.361     | -                | -    | -      | -           | -        | -        | 1.002  | 0.521     | 0.281                   | 0.036                                         |             |      |

Table B.4A. [Continued]

|     |          | Intercept | Month (ref: May) |      |        | Fallow deer | Roe deer | Red deer | Moose  | Wild boar | Mean height field layer | Coefficient of variance of height field layer | Temperature | $\Delta$ AIC |
|-----|----------|-----------|------------------|------|--------|-------------|----------|----------|--------|-----------|-------------------------|-----------------------------------------------|-------------|--------------|
|     |          |           | June             | July | August |             |          |          |        |           |                         |                                               |             |              |
| M72 | Estimate | 0.831     | -                | -    | -      | -0.413      | -        | -        | 0.463  | -         | -0.189                  | -                                             | -0.250      | 3.89         |
|     | 95% CI   | Low.      | 0.292            | -    | -      | -           | -0.949   | -        | -0.089 | -         | -0.630                  | -                                             | -0.689      |              |
|     | Upp.     | 1.370     | -                | -    | -      | 0.122       | -        | -        | 1.015  | -         | 0.251                   | -                                             | 0.189       |              |
| M73 | Estimate | 0.833     | -                | -    | -      | -           | -        | 0.354    | 0.446  | -         | -0.110                  | -0.366                                        | -0.167      | 3.89         |
|     | 95% CI   | Low.      | 0.302            | -    | -      | -           | -        | -0.219   | -0.096 | -         | -0.542                  | -0.813                                        | -0.616      |              |
|     | Upp.     | 1.364     | -                | -    | -      | -           | -        | 0.927    | 0.989  | -         | 0.322                   | 0.082                                         | 0.283       |              |
| M74 | Estimate | 0.778     | -                | -    | -      | -0.324      | -        | -        | -      | 0.023     | -                       | -0.430                                        | -           | 3.90         |
|     | 95% CI   | Low.      | 0.292            | -    | -      | -0.837      | -        | -        | -      | -0.416    | -                       | -0.869                                        | -           |              |
|     | Upp.     | 1.264     | -                | -    | -      | 0.190       | -        | -        | -      | 0.463     | -                       | 0.009                                         | -           |              |
| M75 | Estimate | 0.822     | -                | -    | -      | -           | -0.146   | -        | 0.469  | 0.042     | -                       | -0.425                                        | -           | 3.95         |
|     | 95% CI   | Low.      | 0.256            | -    | -      | -           | -0.596   | -        | -0.084 | -0.431    | -                       | -0.880                                        | -           |              |
|     | Upp.     | 1.388     | -                | -    | -      | -           | 0.304    | -        | 1.021  | 0.515     | -                       | 0.031                                         | -           |              |
| M76 | Estimate | 0.829     | -                | -    | -      | -0.329      | -        | -        | 0.476  | 0.117     | -                       | -                                             | -           | 3.95         |
|     | 95% CI   | Low.      | 0.262            | -    | -      | -0.863      | -        | -        | -0.076 | -0.343    | -                       | -                                             | -           |              |
|     | Upp.     | 1.396     | -                | -    | -      | 0.206       | -        | -        | 1.029  | 0.577     | -                       | -                                             | -           |              |
| M77 | Estimate | 0.868     | -                | -    | -      | -0.312      | -0.159   | 0.389    | 0.488  | -         | -                       | -                                             | -           | 3.96         |
|     | 95% CI   | Low.      | 0.289            | -    | -      | -0.861      | -0.189   | -0.189   | -0.065 | -         | -                       | -                                             | -           |              |
|     | Upp.     | 1.446     | -                | -    | -      | 0.230       | 0.968    | 0.968    | 1.042  | -         | -                       | -                                             | -           |              |
| M78 | Estimate | 0.822     | -                | -    | -      | -           | -        | -        | 0.471  | 0.133     | -                       | -                                             | -0.239      | 3.99         |
|     | 95% CI   | Low.      | 0.237            | -    | -      | -           | -        | -        | -0.074 | -0.335    | -                       | -                                             | -0.682      |              |
|     | Upp.     | 1.407     | -                | -    | -      | -           | -        | -        | 1.016  | 0.601     | -                       | -                                             | 0.203       |              |

Table B.4B. Standardized model estimates with 95% confidence intervals for the analysis of the association between the presence of questing *I. ricinus* nymphs and ungulate visitation frequencies, for the deer species summed. Models presented are the best performing GLMMs with a binomial distribution. The final model selected on which interpretations were based is highlighted in bold. M = model.

|     |                 | Intercept    | Month (ref: May) |      |        | Deer   | Wild boar | Mean height<br>field layer | Coefficient of variance<br>of height field layer | Temperature | $\Delta$ AIC |
|-----|-----------------|--------------|------------------|------|--------|--------|-----------|----------------------------|--------------------------------------------------|-------------|--------------|
|     |                 |              | June             | July | August |        |           |                            |                                                  |             |              |
| M1  | Estimate        | 0.767        | -                | -    | -      | -      | -         | -                          | -0.444                                           | -           | 0.00         |
|     | 95% CI          | Low.         | 0.257            | -    | -      | -      | -         | -                          | -0.885                                           | -           |              |
|     |                 | Upp.         | 1.278            | -    | -      | -      | -         | -                          | -0.003                                           | -           |              |
| M2  | Estimate        | 0.766        | -                | -    | -      | -      | -         | -                          | -0.414                                           | -0.174      | 1.33         |
|     | 95% CI          | Low.         | 0.267            | -    | -      | -      | -         | -                          | -0.860                                           | -0.606      |              |
|     |                 | Upp.         | 1.266            | -    | -      | -      | -         | -                          | 0.031                                            | 0.258       |              |
| M3  | Estimate        | 0.769        | -                | -    | -      | -0.175 | -         | -                          | -0.460                                           | -           | 1.50         |
|     | 95% CI          | Low.         | 0.267            | -    | -      | -      | -0.606    | -                          | -0.902                                           | -           |              |
|     |                 | Upp.         | 1.272            | -    | -      | -      | 0.255     | -                          | -0.018                                           | -           |              |
| M4  | Estimate        | 0.769        | -                | -    | -      | -      | -         | -0.147                     | -0.439                                           | -           | 1.69         |
|     | 95% CI          | Low.         | 0.257            | -    | -      | -      | -         | -0.574                     | -0.881                                           | -           |              |
|     |                 | Upp.         | 1.280            | -    | -      | -      | -         | 0.279                      | 0.004                                            | -           |              |
| M5  | <b>Estimate</b> | <b>0.774</b> | -                | -    | -      | -      | -         | -                          | -                                                | -           | <b>1.70</b>  |
|     | <b>95% CI</b>   | <b>Low.</b>  | <b>0.209</b>     | -    | -      | -      | -         | -                          | -                                                | -           |              |
|     |                 | <b>Upp.</b>  | <b>1.339</b>     | -    | -      | -      | -         | -                          | -                                                | -           |              |
| M6  | Estimate        | 0.768        | -                | -    | -      | -      | 0.020     | -                          | -0.441                                           | -           | 2.14         |
|     | 95% CI          | Low.         | 0.255            | -    | -      | -      | -         | -0.433                     | -0.887                                           | -           |              |
|     |                 | Upp.         | 1.282            | -    | -      | -      | -         | 0.474                      | 0.005                                            | -           |              |
| M7  | Estimate        | 0.774        | -                | -    | -      | -      | -         | -                          | -                                                | -0.240      | 2.31         |
|     | 95% CI          | Low.         | 0.228            | -    | -      | -      | -         | -                          | -                                                | -0.672      |              |
|     |                 | Upp.         | 1.321            | -    | -      | -      | -         | -                          | -                                                | 0.192       |              |
| M8  | Estimate        | 0.770        | -                | -    | -      | -0.214 | -         | -                          | -0.426                                           | -0.216      | 2.56         |
|     | 95% CI          | Low.         | 0.281            | -    | -      | -      | -0.645    | -                          | -0.872                                           | -0.654      |              |
|     |                 | Upp.         | 1.260            | -    | -      | -      | 0.218     | -                          | 0.019                                            | 0.223       |              |
| M9  | Estimate        | 0.771        | -                | -    | -      | -0.200 | -         | -0.175                     | -0.457                                           | -           | 3.05         |
|     | 95% CI          | Low.         | 0.269            | -    | -      | -      | -0.634    | -                          | -0.604                                           | -0.900      |              |
|     |                 | Upp.         | 1.272            | -    | -      | -      | 0.235     | -                          | 0.255                                            | -0.013      |              |
| M10 | Estimate        | 0.777        | -                | -    | -      | -      | -         | -0.171                     | -                                                | -           | 3.22         |
|     | 95% CI          | Low.         | 0.209            | -    | -      | -      | -         | -                          | -0.606                                           | -           |              |
|     |                 | Upp.         | 1.344            | -    | -      | -      | -         | -                          | 0.265                                            | -           |              |
| M11 | Estimate        | 0.768        | -                | -    | -      | -      | -         | -0.119                     | -0.414                                           | -0.152      | 3.26         |
|     | 95% CI          | Low.         | 0.267            | -    | -      | -      | -         | -                          | -0.549                                           | -0.860      | -0.594       |
|     |                 | Upp.         | 1.269            | -    | -      | -      | -         | -                          | 0.311                                            | 0.033       | 0.289        |



Table B.4B. [Continued]

|     |          | Intercept | Month (ref: May) |      |        | Deer   | Wild boar | Mean height<br>field layer | Coefficient of variance<br>of height field layer | Temperature | $\Delta$ AIC |
|-----|----------|-----------|------------------|------|--------|--------|-----------|----------------------------|--------------------------------------------------|-------------|--------------|
|     |          |           | June             | July | August |        |           |                            |                                                  |             |              |
| M12 | Estimate | 0.774     | -                | -    | -      | -0.137 | -         | -                          | -                                                | -           | 3.45         |
|     | 95% CI   | Low.      | 0.218            | -    | -      | -      | -0.587    | -                          | -                                                | -           |              |
|     |          | Upp.      | 1.330            | -    | -      | -      | 0.312     | -                          | -                                                | -           |              |
| M13 | Estimate | 0.768     | -                | -    | -      | -      | 0.035     | -                          | -0.409                                           | -0.177      | 3.49         |
|     | 95% CI   | Low.      | 0.265            | -    | -      | -      | -0.418    | -                          | -0.861                                           | -0.611      |              |
|     |          | Upp.      | 1.272            | -    | -      | -      | 0.487     | -                          | 0.044                                            | 0.258       |              |
| M14 | Estimate | 0.778     | -                | -    | -      | -      | 0.097     | -                          | -                                                | -           | 3.64         |
|     | 95% CI   | Low.      | 0.207            | -    | -      | -      | -0.362    | -                          | -                                                | -           |              |
|     |          | Upp.      | 1.350            | -    | -      | -      | 0.557     | -                          | -                                                | -           |              |
| M15 | Estimate | 0.770     | -                | -    | -      | -0.176 | 0.025     | -                          | -0.457                                           | -           | 3.68         |
|     | 95% CI   | Low.      | 0.265            | -    | -      | -0.607 | -0.424    | -                          | -0.904                                           | -           |              |
|     |          | Upp.      | 1.276            | -    | -      | -      | 0.255     | 0.475                      | -                                                | -0.010      |              |
| M16 | Estimate | 0.777     | -                | -    | -      | -0.196 | -         | -                          | -                                                | -0.281      | 3.72         |
|     | 95% CI   | Low.      | 0.242            | -    | -      | -0.644 | -         | -                          | -                                                | -0.722      |              |
|     |          | Upp.      | 1.311            | -    | -      | -      | 0.253     | -                          | -                                                | 0.159       |              |
| M17 | Estimate | 0.770     | -                | -    | -      | -      | 0.024     | -0.148                     | -0.435                                           | -           | 3.86         |
|     | 95% CI   | Low.      | 0.256            | -    | -      | -      | -0.433    | -0.576                     | -0.884                                           | -           |              |
|     |          | Upp.      | 1.285            | -    | -      | -      | 0.481     | 0.280                      | 0.014                                            | -           |              |

Table B.4C. Standardized model estimates with 95% confidence intervals for the analysis of the association between the presence of questing *I. ricinus* nymphs and ungulate visitation frequencies, for the ungulate species summed. Models presented are the best performing GLMMs with a binomial distribution. The final model selected on which interpretations were based is highlighted in bold. M = model.

|    |          | Intercept | Month (ref: May) |      |        | Ungulates | Mean height<br>field layer | Coefficient of variance<br>of height field layer | Temperature | $\Delta$ AIC |
|----|----------|-----------|------------------|------|--------|-----------|----------------------------|--------------------------------------------------|-------------|--------------|
|    |          |           | June             | July | August |           |                            |                                                  |             |              |
| M1 | Estimate | 0.767     | -                | -    | -      | -         | -                          | -0.444                                           | -           | 0.00         |
|    | 95% CI   | Low.      | 0.257            | -    | -      | -         | -                          | -0.885                                           | -           |              |
|    |          | Upp.      | 1.278            | -    | -      | -         | -                          | -0.003                                           | -           |              |
| M2 | Estimate | 0.770     | -                | -    | -      | -0.214    | -                          | -0.466                                           | -           | 1.23         |
|    | 95% CI   | Low.      | 0.269            | -    | -      | -0.655    | -                          | -0.908                                           | -           |              |
|    |          | Upp.      | 1.271            | -    | -      | -         | 0.227                      | -                                                | -0.023      |              |

Table B.4C. [Continued]

|           |                    | Intercept    | Month (ref: May) |      |        | Ungulates | Mean height<br>field layer | Coefficient of variance<br>of height field layer | Temperature | $\Delta$ AIC |
|-----------|--------------------|--------------|------------------|------|--------|-----------|----------------------------|--------------------------------------------------|-------------|--------------|
|           |                    |              | June             | July | August |           |                            |                                                  |             |              |
| M3        | Estimate           | 0.766        | -                | -    | -      | -         | -                          | -0.414                                           | -0.174      | 1.33         |
|           | 95% CI Low.        | 0.267        | -                | -    | -      | -         | -                          | -0.860                                           | -0.606      |              |
|           | Upp.               | 1.266        | -                | -    | -      | -         | -                          | 0.031                                            | 0.258       |              |
| M4        | Estimate           | 0.769        | -                | -    | -      | -         | -0.147                     | -0.439                                           | -           | 1.69         |
|           | 95% CI Low.        | 0.257        | -                | -    | -      | -         | -0.574                     | -0.881                                           | -           |              |
|           | Upp.               | 1.280        | -                | -    | -      | -         | 0.279                      | 0.004                                            | -           |              |
| <b>M5</b> | <b>Estimate</b>    | <b>0.774</b> | -                | -    | -      | -         | -                          | -                                                | -           | <b>1.70</b>  |
|           | <b>95% CI Low.</b> | <b>0.209</b> | -                | -    | -      | -         | -                          | -                                                | -           |              |
|           | <b>Upp.</b>        | <b>1.339</b> | -                | -    | -      | -         | -                          | -                                                | -           |              |
| M6        | Estimate           | 0.774        | -                | -    | -      | -         | -                          | -                                                | -0.240      | 2.31         |
|           | 95% CI Low.        | 0.228        | -                | -    | -      | -         | -                          | -                                                | -0.672      |              |
|           | Upp.               | 1.321        | -                | -    | -      | -         | -                          | -                                                | 0.192       |              |
| M7        | Estimate           | 0.771        | -                | -    | -      | -0.239    | -                          | -0.433                                           | -0.206      | 2.34         |
|           | 95% CI Low.        | 0.283        | -                | -    | -      | -0.678    | -                          | -0.879                                           | -0.640      |              |
|           | Upp.               | 1.260        | -                | -    | -      | 0.199     | -                          | 0.013                                            | 0.228       |              |
| M8        | Estimate           | 0.771        | -                | -    | -      | -0.232    | -0.169                     | -0.462                                           | -           | 2.81         |
|           | 95% CI Low.        | 0.272        | -                | -    | -      | -0.675    | -0.596                     | -0.906                                           | -           |              |
|           | Upp.               | 1.271        | -                | -    | -      | 0.212     | 0.257                      | -0.018                                           | -           |              |
| M9        | Estimate           | 0.777        | -                | -    | -      | -         | -0.171                     | -                                                | -           | 3.22         |
|           | 95% CI Low.        | 0.209        | -                | -    | -      | -         | -0.606                     | -                                                | -           |              |
|           | Upp.               | 1.344        | -                | -    | -      | -         | 0.265                      | -                                                | -           |              |
| M10       | Estimate           | 0.776        | -                | -    | -      | -0.175    | -                          | -                                                | -           | 3.26         |
|           | 95% CI Low.        | 0.221        | -                | -    | -      | -0.640    | -                          | -                                                | -           |              |
|           | Upp.               | 1.330        | -                | -    | -      | 0.290     | -                          | -                                                | -           |              |
| M11       | Estimate           | 0.768        | -                | -    | -      | -         | -0.119                     | -0.414                                           | -0.152      | 3.26         |
|           | 95% CI Low.        | 0.267        | -                | -    | -      | -         | -0.549                     | -0.860                                           | -0.594      |              |
|           | Upp.               | 1.269        | -                | -    | -      | -         | 0.311                      | 0.033                                            | 0.289       |              |
| M12       | Estimate           | 0.778        | -                | -    | -      | -0.215    | -                          | -                                                | -0.272      | 3.58         |
|           | 95% CI Low.        | 0.243        | -                | -    | -      | -0.673    | -                          | -                                                | -0.707      |              |
|           | Upp.               | 1.313        | -                | -    | -      | 0.243     | -                          | -                                                | 0.164       |              |

Table B.5A. Standardized model estimates with 95% confidence intervals for the analysis of the association between the presence of questing *I. ricinus* adults and ungulate visitation frequencies. Models presented are the best performing GLMMs with a binomial distribution. The final model selected on which interpretations were based is highlighted in bold. M = model.

|     |                    | Intercept     | Month (ref: May) |      |        | Fallow deer | Roe deer | Red deer | Moose  | Wild boar | Mean height field layer | Coefficient of variance of height field layer | Temperature | $\Delta$ AIC |
|-----|--------------------|---------------|------------------|------|--------|-------------|----------|----------|--------|-----------|-------------------------|-----------------------------------------------|-------------|--------------|
|     |                    |               | June             | July | August |             |          |          |        |           |                         |                                               |             |              |
| M1  | Estimate           | -2.352        | -                | -    | -      | -           | -        | -        | -      | -         | -0.714                  | -0.989                                        | 0.00        |              |
|     | 95% CI Low.        | -3.130        | -                | -    | -      | -           | -        | -        | -      | -         | -1.480                  | -1.710                                        |             |              |
|     | 95% CI Upp.        | -1.573        | -                | -    | -      | -           | -        | -        | -      | -         | 0.051                   | -0.269                                        |             |              |
| M2  | Estimate           | -2.440        | -                | -    | -      | -           | 0.373    | -        | -      | -         | -0.758                  | -1.025                                        | 0.57        |              |
|     | 95% CI Low.        | -3.269        | -                | -    | -      | -           | -0.247   | -        | -      | -         | -1.540                  | -1.776                                        |             |              |
|     | 95% CI Upp.        | -1.611        | -                | -    | -      | -           | 0.993    | -        | -      | -         | 0.024                   | -0.274                                        |             |              |
| M3  | Estimate           | -2.437        | -                | -    | -      | -           | -        | -        | -0.389 | -         | -0.808                  | -1.008                                        | 0.63        |              |
|     | 95% CI Low.        | -3.267        | -                | -    | -      | -           | -        | -        | -1.031 | -         | -1.636                  | -1.750                                        |             |              |
|     | 95% CI Upp.        | -1.607        | -                | -    | -      | -           | -        | -        | 0.253  | -         | 0.020                   | -0.266                                        |             |              |
| M4  | <b>Estimate</b>    | <b>-2.362</b> | -                | -    | -      | -           | -        | -        | -      | -         | -                       | <b>-1.129</b>                                 | <b>1.36</b> |              |
|     | <b>95% CI Low.</b> | <b>-3.358</b> | -                | -    | -      | -           | -        | -        | -      | -         | -                       | <b>-1.912</b>                                 |             |              |
|     | <b>95% CI Upp.</b> | <b>-1.367</b> | -                | -    | -      | -           | -        | -        | -      | -         | -                       | <b>-0.345</b>                                 |             |              |
| M5  | Estimate           | -2.379        | -                | -    | -      | -           | -        | 0.185    | -      | -         | -0.729                  | -0.999                                        | 1.67        |              |
|     | 95% CI Low.        | -3.175        | -                | -    | -      | -           | -        | -0.332   | -      | -         | -1.509                  | -1.728                                        |             |              |
|     | 95% CI Upp.        | -1.583        | -                | -    | -      | -           | -        | 0.702    | -      | -         | 0.051                   | -0.270                                        |             |              |
| M6  | Estimate           | -2.491        | -                | -    | -      | -           | 0.318    | -        | -0.331 | -         | -0.835                  | -1.028                                        | 1.69        |              |
|     | 95% CI Low.        | -3.174        | -                | -    | -      | -           | -0.308   | -        | -0.975 | -         | -1.671                  | -1.795                                        |             |              |
|     | 95% CI Upp.        | -1.583        | -                | -    | -      | -           | 0.944    | -        | 0.313  | -         | 0.001                   | -0.261                                        |             |              |
| M7  | Estimate           | -2.366        | -                | -    | -      | -           | -        | -        | -      | 0.136     | -0.704                  | -1.038                                        | 1.92        |              |
|     | 95% CI Low.        | -3.153        | -                | -    | -      | -           | -        | -        | -      | -0.460    | -1.470                  | -1.804                                        |             |              |
|     | 95% CI Upp.        | -1.578        | -                | -    | -      | -           | -        | -        | -      | 0.732     | 0.063                   | -0.272                                        |             |              |
| M8  | Estimate           | -2.354        | -                | -    | -      | -0.090      | -        | -        | -      | -         | -0.679                  | -1.003                                        | 2.05        |              |
|     | 95% CI Low.        | -3.134        | -                | -    | -      | -0.621      | -        | -        | -      | -         | -1.467                  | -1.732                                        |             |              |
|     | 95% CI Upp.        | -1.573        | -                | -    | -      | 0.442       | -        | -        | -      | -         | 0.109                   | -0.274                                        |             |              |
| M9  | Estimate           | -2.353        | -                | -    | -      | -           | -0.096   | -        | -      | -         | -0.730                  | -0.986                                        | 2.09        |              |
|     | 95% CI Low.        | -3.132        | -                | -    | -      | -           | -0.675   | -        | -      | -         | -1.501                  | -1.708                                        |             |              |
|     | 95% CI Upp.        | -1.574        | -                | -    | -      | -           | 0.483    | -        | -      | -         | 0.042                   | -0.264                                        |             |              |
| M10 | Estimate           | -2.460        | -                | -    | -      | -           | 0.365    | -        | 0.178  | -         | -0.774                  | -1.029                                        | 2.35        |              |
|     | 95% CI Low.        | -3.300        | -                | -    | -      | -           | -0.254   | -        | -0.358 | -         | -1.570                  | -1.786                                        |             |              |
|     | 95% CI Upp.        | -1.621        | -                | -    | -      | -           | 0.984    | -        | 0.714  | -         | 0.023                   | -0.272                                        |             |              |
| M11 | Estimate           | -2.374        | -                | -    | -      | -           | 0.303    | -        | -      | -         | -                       | -1.129                                        | 2.40        |              |
|     | 95% CI Low.        | -3.361        | -                | -    | -      | -           | -0.312   | -        | -      | -         | -                       | -1.915                                        |             |              |
|     | 95% CI Upp.        | -1.387        | -                | -    | -      | -           | 0.918    | -        | -      | -         | -                       | -0.343                                        |             |              |

Table B.5A. [Continued]

|     |             | Intercept | Month (ref: May) |      |        | Fallow deer | Roe deer | Red deer | Moose  | Wild boar | Mean height field layer | Coefficient of variance of height field layer | Temperature | ΔAIC |
|-----|-------------|-----------|------------------|------|--------|-------------|----------|----------|--------|-----------|-------------------------|-----------------------------------------------|-------------|------|
|     |             |           | June             | July | August |             |          |          |        |           |                         |                                               |             |      |
| M12 | Estimate    | -2.420    | -                | -    | -      | -           | -        | -        | -0.321 | -         | -                       | -1.173                                        | 2.53        |      |
|     | 95% CI Low. | -3.469    | -                | -    | -      | -           | -        | -        | -0.991 | -         | -                       | -1.996                                        |             |      |
|     | 95% CI Upp. | -1.372    | -                | -    | -      | -           | -        | -        | 0.350  | -         | -                       | -0.351                                        |             |      |
| M13 | Estimate    | -2.451    | -                | -    | -      | 0.365       | -        | -        | -      | 0.111     | -0.749                  | -1.064                                        | 2.62        |      |
|     | 95% CI Low. | -3.286    | -                | -    | -      | -0.257      | -        | -        | -      | -0.513    | -1.532                  | -1.859                                        |             |      |
|     | 95% CI Upp. | -1.615    | -                | -    | -      | 0.988       | -        | -        | -      | 0.735     | 0.034                   | -0.270                                        |             |      |
| M14 | Estimate    | -2.443    | -                | -    | -      | -           | -        | 0.113    | -0.359 | -         | -0.810                  | -1.007                                        | 2.66        |      |
|     | 95% CI Low. | -3.278    | -                | -    | -      | -           | -        | -0.432   | -1.017 | -         | -1.643                  | -1.752                                        |             |      |
|     | 95% CI Upp. | -1.609    | -                | -    | -      | -           | -        | 0.659    | 0.299  | -         | 0.023                   | -0.262                                        |             |      |
| M15 | Estimate    | -2.440    | -                | -    | -      | 0.373       | -0.095   | -        | -      | -         | -0.771                  | -1.021                                        | 2.70        |      |
|     | 95% CI Low. | -3.268    | -                | -    | -      | -0.246      | -0.671   | -        | -      | -         | -1.558                  | -1.774                                        |             |      |
|     | 95% CI Upp. | -1.612    | -                | -    | -      | 0.992       | 0.480    | -        | -      | -         | 0.016                   | -0.269                                        |             |      |
| M16 | Estimate    | -2.442    | -                | -    | -      | -           | -        | -        | -0.378 | 0.092     | -0.797                  | -1.037                                        | 2.71        |      |
|     | 95% CI Low. | -3.274    | -                | -    | -      | -           | -        | -        | -1.024 | -0.524    | -1.624                  | -1.814                                        |             |      |
|     | 95% CI Upp. | -1.610    | -                | -    | -      | -           | -        | -        | 0.268  | 0.709     | 0.031                   | -0.261                                        |             |      |
| M17 | Estimate    | -2.440    | -                | -    | -      | -0.059      | 0.368    | -        | -      | -         | -0.732                  | -1.034                                        | 2.73        |      |
|     | 95% CI Low. | -3.270    | -                | -    | -      | -0.599      | -0.255   | -        | -      | -         | -1.545                  | -1.792                                        |             |      |
|     | 95% CI Upp. | -1.610    | -                | -    | -      | 0.482       | 0.991    | -        | -      | -         | 0.081                   | -0.276                                        |             |      |
| M18 | Estimate    | -2.437    | -                | -    | -      | -0.059      | -        | -        | -0.382 | -         | -0.780                  | -1.018                                        | 2.79        |      |
|     | 95% CI Low. | -3.267    | -                | -    | -      | -0.598      | -        | -        | -1.026 | -         | -1.640                  | -1.770                                        |             |      |
|     | 95% CI Upp. | -1.607    | -                | -    | -      | 0.480       | -        | -        | 0.261  | -         | 0.080                   | -0.267                                        |             |      |
| M19 | Estimate    | -2.451    | -                | -    | -      | -           | -0.061   | -        | -0.387 | -         | -0.815                  | -1.009                                        | 2.82        |      |
|     | 95% CI Low. | -3.518    | -                | -    | -      | -           | -0.714   | -        | -0.108 | -         | -0.165                  | -1.782                                        |             |      |
|     | 95% CI Upp. | -1.383    | -                | -    | -      | -           | 0.593    | -        | 0.303  | -         | 0.020                   | -0.236                                        |             |      |
| M20 | Estimate    | -2.298    | -                | -    | -      | -0.205      | -        | -        | -      | -         | -                       | -1.120                                        | 3.00        |      |
|     | 95% CI Low. | -3.253    | -                | -    | -      | -0.787      | -        | -        | -      | -         | -                       | -1.880                                        |             |      |
|     | 95% CI Upp. | -1.342    | -                | -    | -      | 0.376       | -        | -        | -      | -         | -                       | -0.360                                        |             |      |
| M21 | Estimate    | -2.363    | -                | -    | -      | -           | -        | 0.165    | -      | -         | -                       | -1.134                                        | 3.08        |      |
|     | 95% CI Low. | -3.356    | -                | -    | -      | -           | -        | -0.360   | -      | -         | -                       | -1.922                                        |             |      |
|     | 95% CI Upp. | -1.370    | -                | -    | -      | -           | -        | 0.690    | -      | -         | -                       | -0.347                                        |             |      |
| M22 | Estimate    | -2.342    | -                | -    | -      | -           | -        | -        | -      | 0.130     | -                       | -1.165                                        | 3.25        |      |
|     | 95% CI Low. | -3.316    | -                | -    | -      | -           | -        | -        | -      | -0.484    | -                       | -1.969                                        |             |      |
|     | 95% CI Upp. | -1.368    | -                | -    | -      | -           | -        | -        | -      | 0.743     | -                       | -0.362                                        |             |      |
| M23 | Estimate    | -2.396    | -                | -    | -      | -           | -0.099   | -        | -      | -         | -                       | -1.142                                        | 3.43        |      |
|     | 95% CI Low. | -3.440    | -                | -    | -      | -           | -0.748   | -        | -      | -         | -                       | -1.944                                        |             |      |
|     | 95% CI Upp. | -1.352    | -                | -    | -      | -           | 0.550    | -        | -      | -         | -                       | -0.341                                        |             |      |

Table B.5A. [Continued]

|     |             | Intercept   | Month (ref: May) |      |        | Fallow deer | Roe deer | Red deer | Moose  | Wild boar | Mean height<br>field layer | Coefficient of variance<br>of height field layer | Temperature | ΔAIC |
|-----|-------------|-------------|------------------|------|--------|-------------|----------|----------|--------|-----------|----------------------------|--------------------------------------------------|-------------|------|
|     |             |             | June             | July | August |             |          |          |        |           |                            |                                                  |             |      |
| M24 | Estimate    | -2.391      | -                | -    | -      | -           | -        | 0.179    | -      | 0.128     | -0.717                     | -1.044                                           | 3.67        |      |
|     | 95% CI      | Low. -3.194 | -                | -    | -      | -           | -        | -0.339   | -      | -0.482    | -1.498                     | -1.819                                           |             |      |
|     | Upp. -1.588 | -           | -                | -    | -      | -           | -        | 0.697    | -      | 0.737     | 0.064                      | -0.270                                           |             |      |
| M25 | Estimate    | -2.496      | -                | -    | -      | -           | 0.316    | 0.113    | -0.300 | -         | -0.837                     | -1.026                                           | 3.78        |      |
|     | 95% CI      | Low. -3.355 | -                | -    | -      | -           | -0.310   | -0.451   | -0.963 | -         | -1.677                     | -1.795                                           |             |      |
|     | Upp. -1.637 | -           | -                | -    | -      | 0.942       | -        | 0.676    | 0.363  | -         | 0.003                      | -0.257                                           |             |      |
| M26 | Estimate    | -2.380      | -                | -    | -      | -           | -0.096   | 0.185    | -      | -         | -0.744                     | -0.995                                           | 3.80        |      |
|     | 95% CI      | Low. -3.175 | -                | -    | -      | -           | -0.675   | -0.332   | -      | -         | -1.529                     | -1.726                                           |             |      |
|     | Upp. -1.584 | -           | -                | -    | -      | -           | 0.483    | 0.702    | -      | -         | 0.042                      | -0.265                                           |             |      |
| M27 | Estimate    | -2.379      | -                | -    | -      | -0.071      | -        | 0.178    | -      | -         | -0.699                     | -1.009                                           | 3.81        |      |
|     | 95% CI      | Low. -3.176 | -                | -    | -      | -0.604      | -        | -0.342   | -      | -         | -1.506                     | -1.745                                           |             |      |
|     | Upp. -1.583 | -           | -                | -    | -      | 0.462       | -        | 0.698    | -      | -         | 0.107                      | -0.273                                           |             |      |
| M28 | Estimate    | -2.495      | -                | -    | -      | -           | 0.313    | -        | -0.323 | 0.067     | -0.826                     | -1.049                                           | 3.88        |      |
|     | 95% CI      | Low. -3.353 | -                | -    | -      | -           | -0.316   | -        | -0.972 | -0.574    | -1.663                     | -1.849                                           |             |      |
|     | Upp. -1.636 | -           | -                | -    | -      | -           | 0.943    | -        | 0.327  | 0.708     | 0.011                      | -0.249                                           |             |      |
| M29 | Estimate    | -2.419      | -                | -    | -      | -           | 0.258    | -        | -0.268 | -         | -                          | -1.163                                           | 3.92        |      |
|     | 95% CI      | Low. -3.456 | -                | -    | -      | -           | -0.365   | -        | -0.937 | -         | -                          | -1.984                                           |             |      |
|     | Upp. -1.383 | -           | -                | -    | -      | -           | 0.881    | -        | 0.401  | -         | -                          | -0.342                                           |             |      |
| M30 | Estimate    | -2.489      | -                | -    | -      | -           | 0.318    | -0.058   | -      | -0.323    | -                          | -0.841                                           | 3.92        |      |
|     | 95% CI      | Low. -3.346 | -                | -    | -      | -           | -0.307   | -0.641   | -      | -0.972    | -                          | -1.678                                           |             |      |
|     | Upp. -1.633 | -           | -                | -    | -      | -           | 0.944    | 0.526    | -      | 0.326     | -                          | -0.004                                           |             |      |
| M31 | Estimate    | -2.491      | -                | -    | -      | -0.041      | 0.316    | -        | -0.328 | -         | -0.814                     | -1.035                                           | 3.92        |      |
|     | 95% CI      | Low. -3.349 | -                | -    | -      | -0.583      | -0.313   | -        | -0.973 | -         | -1.688                     | -1.810                                           |             |      |
|     | Upp. -1.633 | -           | -                | -    | -      | 0.500       | 0.944    | -        | 0.317  | -         | 0.060                      | -0.260                                           |             |      |

Table B.5B. Standardized model estimates with 95% confidence intervals for the analysis of the association between the presence of questing *I. ricinus* adults and ungulate visitation frequencies, for the deer species summed. Models presented are the best performing GLMMs with a binomial distribution. The final model selected on which interpretations were based is highlighted in bold. M = model.

|     |          | Intercept     | Month (ref: May) |      |        | Deer   | Wild boar | Mean height<br>field layer | Coefficient of variance<br>of height field layer | Temperature   | $\Delta$ AIC |
|-----|----------|---------------|------------------|------|--------|--------|-----------|----------------------------|--------------------------------------------------|---------------|--------------|
|     |          |               | June             | July | August |        |           |                            |                                                  |               |              |
| M1  | Estimate | -2.352        | -                | -    | -      | -      | -         | -                          | -0.714                                           | -0.989        | 0.00         |
|     | 95% CI   | Low.          | -3.130           | -    | -      | -      | -         | -                          | -1.480                                           | -1.710        |              |
|     |          | Upp.          | -1.573           | -    | -      | -      | -         | -                          | 0.051                                            | -0.269        |              |
| M2  | Estimate | -2.437        | -                | -    | -      | -      | -0.389    | -                          | -0.808                                           | -1.008        | 0.63         |
|     | 95% CI   | Low.          | -3.267           | -    | -      | -      | -1.031    | -                          | -1.636                                           | -1.750        |              |
|     |          | Upp.          | -1.607           | -    | -      | -      | 0.253     | -                          | 0.020                                            | -0.266        |              |
| M3  | Estimate | <b>-2.362</b> | -                | -    | -      | -      | -         | -                          | -                                                | <b>-1.129</b> | <b>1.36</b>  |
|     | 95% CI   | Low.          | <b>-3.358</b>    | -    | -      | -      | -         | -                          | -                                                | <b>-1.912</b> |              |
|     |          | Upp.          | <b>-1.367</b>    | -    | -      | -      | -         | -                          | -                                                | <b>-0.345</b> |              |
| M4  | Estimate | -2.367        | -                | -    | -      | -0.306 | -         | -                          | -0.679                                           | -1.021        | 1.40         |
|     | 95% CI   | Low.          | -3.152           | -    | -      | -0.959 | -         | -                          | -1.437                                           | -1.747        |              |
|     |          | Upp.          | -1.582           | -    | -      | 0.347  | -         | -                          | 0.079                                            | -0.295        |              |
| M5  | Estimate | -2.366        | -                | -    | -      | -      | -         | 0.136                      | -0.704                                           | -1.038        | 1.92         |
|     | 95% CI   | Low.          | -3.153           | -    | -      | -      | -         | -0.460                     | -1.470                                           | -1.804        |              |
|     |          | Upp.          | -1.578           | -    | -      | -      | -         | 0.732                      | 0.063                                            | -0.272        |              |
| M6  | Estimate | -2.435        | -                | -    | -      | -0.241 | -0.349    | -                          | -0.755                                           | -1.036        | 2.39         |
|     | 95% CI   | Low.          | -3.261           | -    | -      | -0.905 | -0.995    | -                          | -1.574                                           | -1.785        |              |
|     |          | Upp.          | -1.608           | -    | -      | 0.422  | 0.298     | -                          | 0.065                                            | -0.287        |              |
| M7  | Estimate | -2.420        | -                | -    | -      | -      | -0.321    | -                          | -                                                | -1.173        | 2.53         |
|     | 95% CI   | Low.          | -3.469           | -    | -      | -      | -0.991    | -                          | -                                                | -1.996        |              |
|     |          | Upp.          | -1.372           | -    | -      | -      | 0.350     | -                          | -                                                | -0.351        |              |
| M8  | Estimate | -2.327        | -                | -    | -      | -0.332 | -         | -                          | -                                                | -1.147        | 2.66         |
|     | 95% CI   | Low.          | -3.283           | -    | -      | -0.980 | -         | -                          | -                                                | -1.912        |              |
|     |          | Upp.          | -1.370           | -    | -      | 0.315  | -         | -                          | -                                                | -0.381        |              |
| M9  | Estimate | -2.442        | -                | -    | -      | -      | -0.378    | 0.092                      | -0.797                                           | -1.037        | 2.71         |
|     | 95% CI   | Low.          | -3.274           | -    | -      | -      | -1.024    | -0.524                     | -1.624                                           | -1.814        |              |
|     |          | Upp.          | -1.610           | -    | -      | -      | 0.268     | 0.709                      | 0.031                                            | -0.261        |              |
| M10 | Estimate | -2.342        | -                | -    | -      | -      | -         | 0.130                      | -                                                | -1.165        | 3.25         |
|     | 95% CI   | Low.          | -3.316           | -    | -      | -      | -         | -0.484                     | -                                                | -1.969        |              |
|     |          | Upp.          | -1.368           | -    | -      | -      | -         | 0.743                      | -                                                | -0.362        |              |
| M11 | Estimate | -2.373        | -                | -    | -      | -0.287 | -         | 0.080                      | -0.673                                           | -1.046        | 3.52         |
|     | 95% CI   | Low.          | -3.161           | -    | -      | -0.957 | -         | -0.549                     | -1.434                                           | -1.807        |              |
|     |          | Upp.          | -1.584           | -    | -      | 0.383  | -         | 0.708                      | 0.087                                            | -0.285        |              |

Table B.5C. Standardized model estimates with 95% confidence intervals for the analysis of the association between the presence of questing *I. ricinus* adults and ungulate visitation frequencies, for the ungulate species summed. Models presented are the best performing GLMMs with a binomial distribution. The final model selected on which interpretations were based is highlighted in bold. M = model.

|    |                    | Intercept     | Month (ref: May) |      |        | Ungulates | Mean height<br>field layer | Coefficient of variance<br>of height field layer | Temperature   | $\Delta$ AIC |
|----|--------------------|---------------|------------------|------|--------|-----------|----------------------------|--------------------------------------------------|---------------|--------------|
|    |                    |               | June             | July | August |           |                            |                                                  |               |              |
| M1 | Estimate           | -2.352        | -                | -    | -      | -         | -                          | -0.714                                           | -0.989        | 0.00         |
|    | 95% CI Low.        | -3.130        | -                | -    | -      | -         | -                          | -1.479                                           | -1.710        |              |
|    | 95% CI Upp.        | -1.573        | -                | -    | -      | -         | -                          | 0.051                                            | -0.269        |              |
| M2 | Estimate           | -2.386        | -                | -    | -      | -0.384    | -                          | -0.677                                           | -1.024        | 0.81         |
|    | 95% CI Low.        | -3.178        | -                | -    | -      | -1.006    | -                          | -1.441                                           | -1.755        |              |
|    | 95% CI Upp.        | -1.594        | -                | -    | -      | 0.238     | -                          | 0.088                                            | -0.293        |              |
| M3 | <b>Estimate</b>    | <b>-2.362</b> | -                | -    | -      | -         | -                          | -                                                | <b>-1.129</b> | <b>1.36</b>  |
|    | <b>95% CI Low.</b> | <b>-3.358</b> | -                | -    | -      | -         | -                          | -                                                | <b>-1.912</b> |              |
|    | <b>95% CI Upp.</b> | <b>-1.367</b> | -                | -    | -      | -         | -                          | -                                                | <b>-0.345</b> |              |
| M4 | Estimate           | -2.366        | -                | -    | -      | -         | 0.136                      | -0.704                                           | -1.038        | 1.92         |
|    | 95% CI Low.        | -3.153        | -                | -    | -      | -         | -0.460                     | -1.470                                           | -1.804        |              |
|    | 95% CI Upp.        | -1.578        | -                | -    | -      | -         | 0.732                      | 0.063                                            | -0.272        |              |
| M5 | Estimate           | -2.341        | -                | -    | -      | -0.411    | -                          | -                                                | -1.162        | 2.05         |
|    | 95% CI Low.        | -3.299        | -                | -    | -      | -1.021    | -                          | -                                                | -1.937        |              |
|    | 95% CI Upp.        | -1.383        | -                | -    | -      | 0.199     | -                          | -                                                | -0.386        |              |
| M6 | Estimate           | -2.389        | -                | -    | -      | -0.370    | 0.061                      | -0.672                                           | -1.044        | 2.96         |
|    | 95% CI Low.        | -3.183        | -                | -    | -      | -1.008    | -0.567                     | -1.438                                           | -1.807        |              |
|    | 95% CI Upp.        | -1.595        | -                | -    | -      | 0.267     | 0.689                      | 0.095                                            | -0.280        |              |
| M7 | Estimate           | -2.342        | -                | -    | -      | -         | 0.130                      | -                                                | -1.165        | 3.25         |
|    | 95% CI Low.        | -3.316        | -                | -    | -      | -         | -0.484                     | -                                                | -1.969        |              |
|    | 95% CI Upp.        | -1.368        | -                | -    | -      | -         | 0.743                      | -                                                | -0.362        |              |

Table B.6A. Standardized model estimates with 95% confidence intervals for the analysis of the association between the presence of questing *I. ricinus* ticks (larvae, nymphs and adults combined) and ungulate visitation frequencies. Models presented are the best performing GLMMs with a binomial distribution. The final model selected on which interpretations were based is highlighted in bold. M = model.

|           |                    | Intercept    | Month (ref: May) |      |        | Fallow deer | Roe deer | Red deer | Moose  | Wild boar | Mean height field layer | Coefficient of variance of height field layer | Temperature | $\Delta AIC$ |
|-----------|--------------------|--------------|------------------|------|--------|-------------|----------|----------|--------|-----------|-------------------------|-----------------------------------------------|-------------|--------------|
|           |                    |              | June             | July | August |             |          |          |        |           |                         |                                               |             |              |
| M1        | Estimate           | 1.441        | -                | -    | -      | -           | -        | -        | -      | -         | -0.405                  | -                                             | 0.00        |              |
|           | 95% CI Low.        | 0.702        | -                | -    | -      | -           | -        | -        | -      | -         | -0.902                  | -                                             |             |              |
|           | Upp.               | 2.179        | -                | -    | -      | -           | -        | -        | -      | -         | 0.091                   | -                                             |             |              |
| <b>M2</b> | <b>Estimate</b>    | <b>1.451</b> | -                | -    | -      | -           | -        | -        | -      | -         | -                       | -                                             | <b>0.43</b> |              |
|           | <b>95% CI Low.</b> | <b>0.669</b> | -                | -    | -      | -           | -        | -        | -      | -         | -                       | -                                             |             |              |
|           | <b>Upp.</b>        | <b>2.232</b> | -                | -    | -      | -           | -        | -        | -      | -         | -                       | -                                             |             |              |
| M3        | Estimate           | 1.454        | -                | -    | -      | -           | -        | -        | -      | -         | -0.384                  | -0.233                                        | 1.23        |              |
|           | 95% CI Low.        | 0.713        | -                | -    | -      | -           | -        | -        | -      | -         | -0.883                  | -0.731                                        |             |              |
|           | Upp.               | 2.195        | -                | -    | -      | -           | -        | -        | -      | -         | 0.115                   | 0.266                                         |             |              |
| M4        | Estimate           | 1.463        | -                | -    | -      | -           | -        | -        | -      | -         | -                       | -0.269                                        | 1.32        |              |
|           | 95% CI Low.        | 0.686        | -                | -    | -      | -           | -        | -        | -      | -         | -                       | -0.770                                        |             |              |
|           | Upp.               | 2.239        | -                | -    | -      | -           | -        | -        | -      | -         | -                       | 0.231                                         |             |              |
| M5        | Estimate           | 1.474        | -                | -    | -      | -           | -        | 0.230    | -      | -         | -0.399                  | -                                             | 1.43        |              |
|           | 95% CI Low.        | 0.700        | -                | -    | -      | -           | -        | -0.326   | -      | -         | -0.901                  | -                                             |             |              |
|           | Upp.               | 2.249        | -                | -    | -      | -           | -        | 0.785    | -      | -         | 0.103                   | -                                             |             |              |
| M6        | Estimate           | 1.481        | -                | -    | -      | -           | -        | 0.245    | -      | -         | -                       | -                                             | 1.70        |              |
|           | 95% CI Low.        | 0.670        | -                | -    | -      | -           | -        | -0.304   | -      | -         | -                       | -                                             |             |              |
|           | Upp.               | 2.292        | -                | -    | -      | -           | -        | 0.795    | -      | -         | -                       | -                                             |             |              |
| M7        | Estimate           | 1.442        | -                | -    | -      | -           | -        | 0.138    | -      | -         | -0.397                  | -                                             | 1.94        |              |
|           | 95% CI Low.        | 0.710        | -                | -    | -      | -           | -        | -0.473   | -      | -         | -0.891                  | -                                             |             |              |
|           | Upp.               | 2.174        | -                | -    | -      | -           | -        | 0.748    | -      | -         | 0.098                   | -                                             |             |              |
| M8        | Estimate           | 1.449        | -                | -    | -      | -           | -        | -        | -      | -0.109    | -0.408                  | -                                             | 1.97        |              |
|           | 95% CI Low.        | 0.701        | -                | -    | -      | -           | -        | -        | -      | -0.620    | -0.907                  | -                                             |             |              |
|           | Upp.               | 2.197        | -                | -    | -      | -           | -        | -        | -      | 0.401     | 0.090                   | -                                             |             |              |
| M9        | Estimate           | 1.444        | -                | -    | -      | -           | -0.052   | -        | -      | -         | -0.402                  | -                                             | 2.10        |              |
|           | 95% CI Low.        | 0.700        | -                | -    | -      | -           | -0.547   | -        | -      | -         | -0.899                  | -                                             |             |              |
|           | Upp.               | 2.188        | -                | -    | -      | -           | 0.443    | -        | -      | -         | 0.096                   | -                                             |             |              |
| M10       | Estimate           | 1.440        | -                | -    | -      | -0.055      | -        | -        | -      | -         | -0.398                  | -                                             | 2.11        |              |
|           | 95% CI Low.        | 0.705        | -                | -    | -      | -0.641      | -        | -        | -      | -         | -0.899                  | -                                             |             |              |
|           | Upp.               | 2.175        | -                | -    | -      | 0.530       | -        | -        | -      | -         | 0.103                   | -                                             |             |              |
| M11       | Estimate           | 1.440        | -                | -    | -      | -           | -        | -        | -0.013 | -         | -0.406                  | -                                             | 2.14        |              |
|           | 95% CI Low.        | 0.701        | -                | -    | -      | -           | -        | -        | -0.541 | -         | -0.904                  | -                                             |             |              |
|           | Upp.               | 2.178        | -                | -    | -      | -           | -        | -        | 0.515  | -         | 0.092                   | -                                             |             |              |



Table B.6A. [Continued]

|     |             | Intercept | Month (ref: May) |      |        | Fallow deer | Roe deer | Red deer | Moose  | Wild boar | Mean height field layer | Coefficient of variance of height field layer | Temperature | $\Delta$ AIC |
|-----|-------------|-----------|------------------|------|--------|-------------|----------|----------|--------|-----------|-------------------------|-----------------------------------------------|-------------|--------------|
|     |             |           | June             | July | August |             |          |          |        |           |                         |                                               |             |              |
| M12 | Estimate    | 1.447     | -                | -    | -      | -           | 0.157    | -        | -      | -         | -                       | -                                             | 2.25        |              |
|     | 95% CI Low. | 0.678     | -                | -    | -      | -           | -0.438   | -        | -      | -         | -                       | -                                             |             |              |
|     | Upp.        | 2.216     | -                | -    | -      | -           | 0.752    | -        | -      | -         | -                       | -                                             |             |              |
| M13 | Estimate    | 1.459     | -                | -    | -      | -           | -        | -        | -      | -0.103    | -                       | -                                             | 2.38        |              |
|     | 95% CI Low. | 0.668     | -                | -    | -      | -           | -        | -        | -      | -0.615    | -                       | -                                             |             |              |
|     | Upp.        | 2.250     | -                | -    | -      | -           | -        | -        | -      | 0.409     | -                       | -                                             |             |              |
| M14 | Estimate    | 1.445     | -                | -    | -      | -0.115      | -        | -        | -      | -         | -                       | -                                             | 2.39        |              |
|     | 95% CI Low. | 0.676     | -                | -    | -      | -0.696      | -        | -        | -      | -         | -                       | -                                             |             |              |
|     | Upp.        | 2.215     | -                | -    | -      | 0.466       | -        | -        | -      | -         | -                       | -                                             |             |              |
| M15 | Estimate    | 1.458     | -                | -    | -      | -           | -0.083   | -        | -      | -         | -                       | -                                             | 2.43        |              |
|     | 95% CI Low. | 0.667     | -                | -    | -      | -           | -0.582   | -        | -      | -         | -                       | -                                             |             |              |
|     | Upp.        | 2.248     | -                | -    | -      | -           | 0.415    | -        | -      | -         | -                       | -                                             |             |              |
| M16 | Estimate    | 1.452     | -                | -    | -      | -           | -        | -        | 0.028  | -         | -                       | -                                             | 2.53        |              |
|     | 95% CI Low. | 0.669     | -                | -    | -      | -           | -        | -        | -0.501 | -         | -                       | -                                             |             |              |
|     | Upp.        | 2.236     | -                | -    | -      | -           | -        | -        | 0.556  | -         | -                       | -                                             |             |              |
| M17 | Estimate    | 1.496     | -                | -    | -      | -           | -        | 0.241    | -      | -         | -                       | -0.266                                        | 2.66        |              |
|     | 95% CI Low. | 0.686     | -                | -    | -      | -           | -        | -0.312   | -      | -         | -                       | -0.771                                        |             |              |
|     | Upp.        | 2.305     | -                | -    | -      | -           | -        | 0.793    | -      | -         | -                       | 0.238                                         |             |              |
| M18 | Estimate    | 1.490     | -                | -    | -      | -           | -        | 0.227    | -      | -         | -0.379                  | -0.231                                        | 2.71        |              |
|     | 95% CI Low. | 0.711     | -                | -    | -      | -           | -        | -0.331   | -      | -         | -0.884                  | -0.735                                        |             |              |
|     | Upp.        | 2.269     | -                | -    | -      | -           | -        | 0.785    | -      | -         | 0.126                   | 0.272                                         |             |              |
| M19 | Estimate    | 1.459     | -                | -    | -      | -           | 0.173    | -        | -      | -         | -                       | -0.275                                        | 3.12        |              |
|     | 95% CI Low. | 0.695     | -                | -    | -      | -           | -0.419   | -        | -      | -         | -                       | -0.774                                        |             |              |
|     | Upp.        | 2.223     | -                | -    | -      | -           | 0.765    | -        | -      | -         | -                       | 0.223                                         |             |              |
| M20 | Estimate    | 1.456     | -                | -    | -      | -           | 0.151    | -        | -      | -         | -0.374                  | -0.238                                        | 3.16        |              |
|     | 95% CI Low. | 0.722     | -                | -    | -      | -           | -0.454   | -        | -      | -         | -0.872                  | -0.736                                        |             |              |
|     | Upp.        | 2.191     | -                | -    | -      | -           | 0.756    | -        | -      | -         | 0.123                   | 0.259                                         |             |              |
| M21 | Estimate    | 1.456     | -                | -    | -      | -0.124      | -        | -        | -      | -         | -                       | -0.271                                        | 3.29        |              |
|     | 95% CI Low. | 0.692     | -                | -    | -      | -0.710      | -        | -        | -      | -         | -                       | -0.769                                        |             |              |
|     | Upp.        | 2.219     | -                | -    | -      | 0.461       | -        | -        | -      | -         | -                       | 0.227                                         |             |              |
| M22 | Estimate    | 1.453     | -                | -    | -      | -0.063      | -        | -        | -      | -         | -0.376                  | -0.233                                        | 3.37        |              |
|     | 95% CI Low. | 0.716     | -                | -    | -      | -0.652      | -        | -        | -      | -         | -0.880                  | -0.731                                        |             |              |
|     | Upp.        | 2.190     | -                | -    | -      | 0.527       | -        | -        | -      | -         | 0.129                   | 0.264                                         |             |              |
| M23 | Estimate    | 1.451     | -                | -    | -      | -           | -        | -        | -0.043 | -         | -0.387                  | -0.237                                        | 3.38        |              |
|     | 95% CI Low. | 0.713     | -                | -    | -      | -           | -        | -        | -0.571 | -         | -0.887                  | -0.739                                        |             |              |
|     | Upp.        | 2.190     | -                | -    | -      | -           | -        | -        | 0.485  | -         | 0.113                   | 0.264                                         |             |              |

Table B.6A. [Continued]

|     |             | Intercept | Month (ref: May) |      |        | Fallow deer | Roe deer | Red deer | Moose  | Wild boar | Mean height<br>field layer | Coefficient of variance<br>of height field layer | Temperature | $\Delta$ AIC |
|-----|-------------|-----------|------------------|------|--------|-------------|----------|----------|--------|-----------|----------------------------|--------------------------------------------------|-------------|--------------|
|     |             |           | June             | July | August |             |          |          |        |           |                            |                                                  |             |              |
| M24 | Estimate    | 1.485     | -                | -    | -      | -           | -        | 0.238    | -      | -0.125    | -0.402                     | -                                                | 3.38        |              |
|     | 95% CI Low. | 0.700     | -                | -    | -      | -           | -        | -0.320   | -      | -0.638    | -0.907                     | -                                                |             |              |
|     | Upp.        | 2.271     | -                | -    | -      | -           | -        | 0.796    | -      | 0.388     | 0.102                      | -                                                |             |              |
| M25 | Estimate    | 1.456     | -                | -    | -      | -           | -0.036   | -        | -      | -         | -0.382                     | -0.231                                           | 3.39        |              |
|     | 95% CI Low. | 0.712     | -                | -    | -      | -           | -0.531   | -        | -      | -         | -0.882                     | -0.731                                           |             |              |
|     | Upp.        | 2.200     | -                | -    | -      | -           | 0.459    | -        | -      | -         | 0.119                      | 0.270                                            |             |              |
| M26 | Estimate    | 1.467     | -                | -    | -      | -           | -0.064   | -        | -      | -         | -                          | -0.265                                           | 3.40        |              |
|     | 95% CI Low. | 0.684     | -                | -    | -      | -           | -0.562   | -        | -      | -         | -                          | -0.768                                           |             |              |
|     | Upp.        | 2.250     | -                | -    | -      | -           | 0.434    | -        | -      | -         | -                          | 0.238                                            |             |              |
| M27 | Estimate    | 1.456     | -                | -    | -      | -           | -        | -        | -      | -0.043    | -0.387                     | -0.221                                           | 3.40        |              |
|     | 95% CI Low. | 0.712     | -                | -    | -      | -           | -        | -        | -      | -0.581    | -0.888                     | -0.742                                           |             |              |
|     | Upp.        | 2.200     | -                | -    | -      | -           | -        | -        | -      | 0.496     | 0.114                      | 0.300                                            |             |              |
| M28 | Estimate    | 1.476     | -                | -    | -      | -           | -        | 0.136    | 0.228  | -         | -0.391                     | -                                                | 3.41        |              |
|     | 95% CI Low. | 0.708     | -                | -    | -      | -           | -        | -0.477   | -0.327 | -         | -0.891                     | -                                                |             |              |
|     | Upp.        | 2.244     | -                | -    | -      | -           | -        | 0.749    | 0.782  | -         | 0.110                      | -                                                |             |              |
| M29 | Estimate    | 1.462     | -                | -    | -      | -           | -        | -        | -      | -0.010    | -                          | -0.271                                           | 3.46        |              |
|     | 95% CI Low. | 0.686     | -                | -    | -      | -           | -        | -        | -      | -0.539    | -                          | -0.775                                           |             |              |
|     | Upp.        | 2.238     | -                | -    | -      | -           | -        | -        | -      | 0.520     | -                          | 0.234                                            |             |              |
| M30 | Estimate    | 1.464     | -                | -    | -      | -           | -        | -        | -      | -0.020    | -                          | -0.264                                           | 3.46        |              |
|     | 95% CI Low. | 0.685     | -                | -    | -      | -           | -        | -        | -      | -0.563    | -                          | -0.788                                           |             |              |
|     | Upp.        | 2.242     | -                | -    | -      | -           | -        | -        | -      | 0.523     | -                          | 0.260                                            |             |              |
| M31 | Estimate    | 1.480     | -                | -    | -      | -           | -0.068   | -        | 0.236  | -         | -0.394                     | -                                                | 3.54        |              |
|     | 95% CI Low. | 0.698     | -                | -    | -      | -           | -0.571   | -        | -0.324 | -         | -0.898                     | -                                                |             |              |
|     | Upp.        | 2.263     | -                | -    | -      | -           | 0.434    | -        | 0.796  | -         | 0.110                      | -                                                |             |              |
| M32 | Estimate    | 1.479     | -                | -    | -      | -           | -        | 0.156    | 0.244  | -         | -                          | -                                                | 3.57        |              |
|     | 95% CI Low. | 0.679     | -                | -    | -      | -           | -        | -0.442   | -0.305 | -         | -                          | -                                                |             |              |
|     | Upp.        | 2.278     | -                | -    | -      | -           | -        | 0.754    | 0.792  | -         | -                          | -                                                |             |              |
| M33 | Estimate    | 1.476     | -                | -    | -      | -0.063      | -        | -        | 0.232  | -         | -0.391                     | -                                                | 3.57        |              |
|     | 95% CI Low. | 0.704     | -                | -    | -      | -0.660      | -        | -        | -0.326 | -         | -0.898                     | -                                                |             |              |
|     | Upp.        | 2.247     | -                | -    | -      | 0.533       | -        | -        | 0.790  | -         | 0.115                      | -                                                |             |              |
| M34 | Estimate    | 1.475     | -                | -    | -      | -           | -        | 0.230    | 0.001  | -         | -0.399                     | -                                                | 3.61        |              |
|     | 95% CI Low. | 0.699     | -                | -    | -      | -           | -        | -0.327   | -0.539 | -         | -0.903                     | -                                                |             |              |
|     | Upp.        | 2.250     | -                | -    | -      | -           | -        | 0.786    | 0.540  | -         | 0.105                      | -                                                |             |              |
| M35 | Estimate    | 1.492     | -                | -    | -      | -           | -        | 0.253    | -      | -0.118    | -                          | -                                                | 3.64        |              |
|     | 95% CI Low. | 0.670     | -                | -    | -      | -           | -        | -0.299   | -      | -0.631    | -                          | -                                                |             |              |
|     | Upp.        | 2.314     | -                | -    | -      | -           | -        | 0.806    | -      | 0.395     | -                          | -                                                |             |              |

Table B.6A. [Continued]

|     |          | Intercept | Month (ref: May) |        |        | Fallow deer | Roe deer | Red deer | Moose  | Wild boar | Mean height<br>field layer | Coefficient of variance<br>of height field layer | Temperature | $\Delta$ AIC |
|-----|----------|-----------|------------------|--------|--------|-------------|----------|----------|--------|-----------|----------------------------|--------------------------------------------------|-------------|--------------|
|     |          |           | June             | July   | August |             |          |          |        |           |                            |                                                  |             |              |
| M36 | Estimate | 1.479     | -                | -      | -      | -0.122      | -        | -        | 0.249  | -         | -                          | -                                                | -           | 3.68         |
|     | 95% CI   | Low.      | 0.678            | -      | -      | -           | -0.713   | -        | -0.305 | -         | -                          | -                                                | -           |              |
|     |          | Upp.      | 2.281            | -      | -      | -           | 0.469    | -        | 0.802  | -         | -                          | -                                                | -           |              |
| M37 | Estimate | 1.491     | -                | -      | -      | -           | -0.101   | -        | 0.254  | -         | -                          | -                                                | -           | 3.69         |
|     | 95% CI   | Low.      | 0.668            | -      | -      | -           | -0.606   | -        | -0.302 | -         | -                          | -                                                | -           |              |
|     |          | Upp.      | 2.315            | -      | -      | -           | 0.405    | -        | 0.810  | -         | -                          | -                                                | -           |              |
| M38 | Estimate | 0.647     | 0.215            | 1.776  | 1.022  | -           | -        | -        | -      | -         | -0.429                     | -0.713                                           | 3.79        |              |
|     | 95% CI   | Low.      | -0.997           | -1.636 | -0.682 | -0.934      | -        | -        | -      | -         | -                          | -0.943                                           |             | -1.521       |
|     |          | Upp.      | 2.291            | 2.065  | 4.235  | 2.978       | -        | -        | -      | -         | -                          | 0.085                                            |             | 0.096        |
| M39 | Estimate | 1.484     | -                | -      | -      | -           | -        | -        | 0.248  | 0.045     | -                          | -                                                | 3.82        |              |
|     | 95% CI   | Low.      | 0.670            | -      | -      | -           | -        | -        | -0.303 | -0.493    | -                          | -                                                |             |              |
|     |          | Upp.      | 2.298            | -      | -      | -           | -        | -        | 0.800  | 0.583     | -                          | -                                                |             |              |
| M40 | Estimate | 1.450     | -                | -      | -      | -           | -        | 0.129    | -      | -         | -0.100                     | -0.400                                           | 3.98        |              |
|     | 95% CI   | Low.      | 0.709            | -      | -      | -           | -        | -        | -0.484 | -         | -                          | -0.609                                           |             |              |
|     |          | Upp.      | 2.191            | -      | -      | -           | -        | -        | 0.742  | -         | -                          | 0.410                                            |             | 0.096        |

Table B.6B. Standardized model estimates with 95% confidence intervals for the analysis of the association between the presence of questing *I. ricinus* ticks (larvae, nymphs and adults combined) and ungulate visitation frequencies, for the deer species summed. Models presented are the best performing GLMMs with a binomial distribution. The final model selected on which interpretations were based is highlighted in bold. M = model.

|           |                    | Intercept    | Month (ref: May) |      |        | Deer   | Wild boar | Mean height<br>field layer | Coefficient of variance<br>of height field layer | Temperature | $\Delta$ AIC |
|-----------|--------------------|--------------|------------------|------|--------|--------|-----------|----------------------------|--------------------------------------------------|-------------|--------------|
|           |                    |              | June             | July | August |        |           |                            |                                                  |             |              |
| M1        | Estimate           | 1.441        | -                | -    | -      | -      | -         | -                          | -0.405                                           | -           | 0.00         |
|           | 95% CI Low.        | 0.702        | -                | -    | -      | -      | -         | -                          | -0.902                                           | -           |              |
|           | Upp.               | 2.179        | -                | -    | -      | -      | -         | -                          | 0.091                                            | -           |              |
| <b>M2</b> | <b>Estimate</b>    | <b>1.451</b> | -                | -    | -      | -      | -         | -                          | -                                                | -           | <b>0.43</b>  |
|           | <b>95% CI Low.</b> | <b>0.669</b> | -                | -    | -      | -      | -         | -                          | -                                                | -           |              |
|           | <b>Upp.</b>        | <b>2.232</b> | -                | -    | -      | -      | -         | -                          | -                                                | -           |              |
| M3        | Estimate           | 1.454        | -                | -    | -      | -      | -         | -                          | -0.384                                           | -0.233      | 1.23         |
|           | 95% CI Low.        | 0.713        | -                | -    | -      | -      | -         | -                          | -0.883                                           | -0.731      |              |
|           | Upp.               | 2.195        | -                | -    | -      | -      | -         | -                          | 0.115                                            | 0.266       |              |
| M4        | Estimate           | 1.463        | -                | -    | -      | -      | -         | -                          | -                                                | -0.269      | 1.32         |
|           | 95% CI Low.        | 0.686        | -                | -    | -      | -      | -         | -                          | -                                                | -0.770      |              |
|           | Upp.               | 2.239        | -                | -    | -      | -      | -         | -                          | -                                                | 0.231       |              |
| M5        | Estimate           | 1.449        | -                | -    | -      | -      | -         | -0.109                     | -0.408                                           | -           | 1.97         |
|           | 95% CI Low.        | 0.701        | -                | -    | -      | -      | -         | -0.620                     | -0.907                                           | -           |              |
|           | Upp.               | 2.197        | -                | -    | -      | -      | -         | 0.401                      | 0.090                                            | -           |              |
| M6        | Estimate           | 1.441        | -                | -    | -      | 0.050  | -         | -                          | -0.407                                           | -           | 2.10         |
|           | 95% CI Low.        | 0.701        | -                | -    | -      | -0.430 | -         | -                          | -0.904                                           | -           |              |
|           | Upp.               | 2.180        | -                | -    | -      | 0.530  | -         | -                          | 0.090                                            | -           |              |
| M7        | Estimate           | 1.440        | -                | -    | -      | -      | -         | -0.013                     | -0.406                                           | -           | 2.14         |
|           | 95% CI Low.        | 0.701        | -                | -    | -      | -      | -         | -0.541                     | -0.904                                           | -           |              |
|           | Upp.               | 2.178        | -                | -    | -      | -      | -         | 0.515                      | 0.092                                            | -           |              |
| M8        | Estimate           | 1.459        | -                | -    | -      | -      | -         | -0.103                     | -                                                | -           | 2.38         |
|           | 95% CI Low.        | 0.668        | -                | -    | -      | -      | -         | -0.615                     | -                                                | -           |              |
|           | Upp.               | 2.250        | -                | -    | -      | -      | -         | 0.409                      | -                                                | -           |              |
| M9        | Estimate           | 1.452        | -                | -    | -      | 0.045  | -         | -                          | -                                                | -           | 2.50         |
|           | 95% CI Low.        | 0.668        | -                | -    | -      | -0.447 | -         | -                          | -                                                | -           |              |
|           | Upp.               | 2.236        | -                | -    | -      | 0.537  | -         | -                          | -                                                | -           |              |
| M10       | Estimate           | 1.452        | -                | -    | -      | -      | 0.028     | -                          | -                                                | -           | 2.53         |
|           | 95% CI Low.        | 0.669        | -                | -    | -      | -      | -0.501    | -                          | -                                                | -           |              |
|           | Upp.               | 2.236        | -                | -    | -      | -      | 0.556     | -                          | -                                                | -           |              |
| M11       | Estimate           | 1.455        | -                | -    | -      | 0.058  | -         | -                          | -0.386                                           | -0.235      | 3.35         |
|           | 95% CI Low.        | 0.713        | -                | -    | -      | -0.427 | -         | -                          | -0.886                                           | -0.734      |              |
|           | Upp.               | 2.198        | -                | -    | -      | 0.543  | -         | -                          | 0.114                                            | 0.264       |              |

Table B.6B. [Continued]

|     |             | <i>Intercept</i> | <i>Month (ref: May)</i> |             |               | <i>Deer</i> | <i>Wild boar</i> | <i>Mean height<br/>field layer</i> | <i>Coefficient of variance<br/>of height field layer</i> | <i>Temperature</i> | $\Delta$ AIC |
|-----|-------------|------------------|-------------------------|-------------|---------------|-------------|------------------|------------------------------------|----------------------------------------------------------|--------------------|--------------|
|     |             |                  | <i>June</i>             | <i>July</i> | <i>August</i> |             |                  |                                    |                                                          |                    |              |
| M12 | Estimate    | 1.451            | -                       | -           | -             | -           | -0.043           | -                                  | -0.387                                                   | -0.237             | 3.38         |
|     | 95% CI Low. | 0.713            | -                       | -           | -             | -           | -0.571           | -                                  | -0.887                                                   | -0.739             |              |
|     | Upp.        | 2.190            | -                       | -           | -             | -           | 0.485            | -                                  | 0.113                                                    | 0.264              |              |
| M13 | Estimate    | 1.456            | -                       | -           | -             | -           | -                | -0.043                             | -0.387                                                   | -0.221             | 3.40         |
|     | 95% CI Low. | 0.712            | -                       | -           | -             | -           | -                | -0.581                             | -0.888                                                   | -0.742             |              |
|     | Upp.        | 2.200            | -                       | -           | -             | -           | -                | 0.496                              | 0.114                                                    | 0.300              |              |
| M14 | Estimate    | 1.465            | -                       | -           | -             | 0.052       | -                | -                                  | -                                                        | -0.271             | 3.41         |
|     | 95% CI Low. | 0.685            | -                       | -           | -             | -0.446      | -                | -                                  | -                                                        | -0.772             |              |
|     | Upp.        | 2.245            | -                       | -           | -             | 0.549       | -                | -                                  | -                                                        | 0.231              |              |
| M15 | Estimate    | 1.462            | -                       | -           | -             | -           | -0.010           | -                                  | -                                                        | -0.271             | 3.46         |
|     | 95% CI Low. | 0.686            | -                       | -           | -             | -           | -0.539           | -                                  | -                                                        | -0.775             |              |
|     | Upp.        | 2.238            | -                       | -           | -             | -           | 0.520            | -                                  | -                                                        | 0.234              |              |
| M16 | Estimate    | 1.464            | -                       | -           | -             | -           | -                | -0.020                             | -                                                        | -0.264             | 3.46         |
|     | 95% CI Low. | 0.685            | -                       | -           | -             | -           | -                | -0.563                             | -                                                        | -0.788             |              |
|     | Upp.        | 2.242            | -                       | -           | -             | -           | -                | 0.523                              | -                                                        | 0.260              |              |
| M17 | Estimate    | 0.647            | 0.215                   | 1.776       | 1.022         | -           | -                | -                                  | -0.429                                                   | -0.713             | 3.79         |
|     | 95% CI Low. | -0.997           | -1.636                  | -0.682      | -0.934        | -           | -                | -                                  | -0.943                                                   | -1.521             |              |
|     | Upp.        | 2.291            | 2.065                   | 4.235       | 2.978         | -           | -                | -                                  | 0.085                                                    | 0.096              |              |

Table B.6C. Standardized model estimates with 95% confidence intervals for the analysis of the association between the presence of questing *I. ricinus* ticks (larvae, nymphs and adults combined) and ungulate visitation frequencies, for the ungulate species summed. Models presented are the best performing GLMMs with a binomial distribution. The final model selected on which interpretations were based is highlighted in bold. M = model.

|           |                 |             | <i>Intercept</i> | <i>Month (ref: May)</i> |             |               | <i>Ungulates</i> | <i>Mean height field layer</i> | <i>Coefficient of variance of height field layer</i> | <i>Temperature</i> | $\Delta$ AIC |
|-----------|-----------------|-------------|------------------|-------------------------|-------------|---------------|------------------|--------------------------------|------------------------------------------------------|--------------------|--------------|
|           |                 |             |                  | <i>June</i>             | <i>July</i> | <i>August</i> |                  |                                |                                                      |                    |              |
| M1        | Estimate        |             | 1.441            | -                       | -           | -             | -                | -                              | -0.405                                               | -                  | 0.00         |
|           | 95% CI          | Low.        | 0.702            | -                       | -           | -             | -                | -                              | -0.902                                               | -                  |              |
|           |                 | Upp.        | 2.179            | -                       | -           | -             | -                | -                              | 0.091                                                | -                  |              |
| <b>M2</b> | <b>Estimate</b> |             | <b>1.451</b>     | -                       | -           | -             | -                | -                              | -                                                    | -                  | <b>0.43</b>  |
|           | <b>95% CI</b>   | <b>Low.</b> | <b>0.669</b>     | -                       | -           | -             | -                | -                              | -                                                    | -                  |              |
|           |                 | <b>Upp.</b> | <b>2.232</b>     | -                       | -           | -             | -                | -                              | -                                                    | -                  |              |
| M3        | Estimate        |             | 1.454            | -                       | -           | -             | -                | -                              | -0.384                                               | -0.233             | 1.23         |
|           | 95% CI          | Low.        | 0.713            | -                       | -           | -             | -                | -                              | -0.883                                               | -0.731             |              |
|           |                 | Upp.        | 2.195            | -                       | -           | -             | -                | -                              | 0.115                                                | 0.266              |              |
| M4        | Estimate        |             | 1.463            | -                       | -           | -             | -                | -                              | -                                                    | -0.269             | 1.32         |
|           | 95% CI          | Low.        | 0.686            | -                       | -           | -             | -                | -                              | -                                                    | -0.770             |              |
|           |                 | Upp.        | 2.239            | -                       | -           | -             | -                | -                              | -                                                    | 0.231              |              |
| M5        | Estimate        |             | 1.449            | -                       | -           | -             | -                | -0.109                         | -0.408                                               | -                  | 1.97         |
|           | 95% CI          | Low.        | 0.701            | -                       | -           | -             | -                | -0.620                         | -0.907                                               | -                  |              |
|           |                 | Upp.        | 2.197            | -                       | -           | -             | -                | 0.401                          | 0.090                                                | -                  |              |
| M6        | Estimate        |             | 1.441            | -                       | -           | -             | -0.110           | -                              | -0.400                                               | -                  | 1.97         |
|           | 95% CI          | Low.        | 0.706            | -                       | -           | -             | -0.635           | -                              | -0.896                                               | -                  |              |
|           |                 | Upp.        | 2.175            | -                       | -           | -             | 0.414            | -                              | 0.096                                                | -                  |              |
| M7        | Estimate        |             | 1.449            | -                       | -           | -             | -0.129           | -                              | -                                                    | -                  | 2.31         |
|           | 95% CI          | Low.        | 0.675            | -                       | -           | -             | -0.669           | -                              | -                                                    | -                  |              |
|           |                 | Upp.        | 2.224            | -                       | -           | -             | 0.410            | -                              | -                                                    | -                  |              |
| M8        | Estimate        |             | 1.459            | -                       | -           | -             | -                | -0.103                         | -                                                    | -                  | 2.38         |
|           | 95% CI          | Low.        | 0.668            | -                       | -           | -             | -                | -0.615                         | -                                                    | -                  |              |
|           |                 | Upp.        | 2.250            | -                       | -           | -             | -                | 0.409                          | -                                                    | -                  |              |
| M9        | Estimate        |             | 1.461            | -                       | -           | -             | -0.151           | -                              | -                                                    | -0.278             | 3.17         |
|           | 95% CI          | Low.        | 0.694            | -                       | -           | -             | -0.703           | -                              | -                                                    | -0.780             |              |
|           |                 | Upp.        | 2.229            | -                       | -           | -             | 0.400            | -                              | -                                                    | 0.223              |              |
| M10       | Estimate        |             | 1.454            | -                       | -           | -             | -0.125           | -                              | -0.377                                               | -0.239             | 3.21         |
|           | 95% CI          | Low.        | 0.718            | -                       | -           | -             | -0.660           | -                              | -0.876                                               | -0.739             |              |
|           |                 | Upp.        | 2.190            | -                       | -           | -             | 0.410            | -                              | 0.122                                                | 0.261              |              |
| M11       | Estimate        |             | 1.456            | -                       | -           | -             | -                | -0.043                         | -0.387                                               | -0.221             | 3.40         |
|           | 95% CI          | Low.        | 0.712            | -                       | -           | -             | -                | -0.581                         | -0.888                                               | -0.742             |              |
|           |                 | Upp.        | 2.200            | -                       | -           | -             | -                | 0.496                          | 0.114                                                | 0.300              |              |

Table B.6C. [Continued]

|     |          | <i>Intercept</i> | <i>Month (ref: May)</i> |             |               | <i>Ungulates</i> | <i>Mean height<br/>field layer</i> | <i>Coefficient of variance<br/>of height field layer</i> | <i>Temperature</i> | $\Delta$ AIC |
|-----|----------|------------------|-------------------------|-------------|---------------|------------------|------------------------------------|----------------------------------------------------------|--------------------|--------------|
|     |          |                  | <i>June</i>             | <i>July</i> | <i>August</i> |                  |                                    |                                                          |                    |              |
| M12 | Estimate | 1.464            | -                       | -           | -             | -                | -0.020                             | -                                                        | -0.264             | 3.46         |
|     | 95% CI   | Low.             | 0.685                   | -           | -             | -                | -0.563                             | -                                                        | -0.788             |              |
|     |          | Upp.             | 2.242                   | -           | -             | -                | 0.523                              | -                                                        | 0.260              |              |
| M13 | Estimate | 0.647            | 0.215                   | 1.776       | 1.022         | -                | -                                  | -0.429                                                   | -0.713             | 3.79         |
|     | 95% CI   | Low.             | -0.997                  | -1.636      | -0.682        | -0.934           | -                                  | -                                                        | -0.943             |              |
|     |          | Upp.             | 2.291                   | 2.065       | 4.235         | 2.978            | -                                  | -                                                        | 0.085              |              |
| M14 | Estimate | 1.449            | -                       | -           | -             | -0.111           | -0.109                             | -0.403                                                   | -                  | 3.98         |
|     | 95% CI   | Low.             | 0.705                   | -           | -             | -0.640           | -0.618                             | -0.900                                                   | -                  |              |
|     |          | Upp.             | 2.192                   | -           | -             | -                | 0.418                              | 0.400                                                    | 0.095              |              |

Table B.7A. Standardized model estimates with 95% confidence intervals for the analysis of the association between the presence of questing *I. ricinus* nymphs and adults, and ungulate visitation frequencies. Models presented are the best performing GLMMs with a binomial distribution. The final model selected on which interpretations were based is highlighted in bold. M = model.

|     |                   | Intercept         | Month (ref: May) |      |        | Fallow deer | Roe deer | Red deer | Moose  | Wild boar | Mean height field layer | Coefficient of variance of height field layer | Temperature | $\Delta$ AIC |
|-----|-------------------|-------------------|------------------|------|--------|-------------|----------|----------|--------|-----------|-------------------------|-----------------------------------------------|-------------|--------------|
|     |                   |                   | June             | July | August |             |          |          |        |           |                         |                                               |             |              |
| M1  | Estimate          | 0.949             | -                | -    | -      | -           | -        | 0.417    | -      | -         | -0.388                  | -                                             | 0.00        |              |
|     | 95% CI            | Low. 0.233        | -                | -    | -      | -           | -        | -0.130   | -      | -         | -0.874                  | -                                             |             |              |
|     | Upp. 1.665        | -                 | -                | -    | -      | -           | -        | 0.965    | -      | -         | 0.098                   | -                                             |             |              |
| M2  | Estimate          | 0.945             | -                | -    | -      | -           | -        | 0.425    | -      | -         | -                       | -                                             | 0.33        |              |
|     | 95% CI            | Low. 0.206        | -                | -    | -      | -           | -        | -0.116   | -      | -         | -                       | -                                             |             |              |
|     | Upp. 1.684        | -                 | -                | -    | -      | -           | -        | 0.967    | -      | -         | -                       | -                                             |             |              |
| M3  | Estimate          | 0.905             | -                | -    | -      | -           | -        | -        | -      | -         | -0.392                  | -                                             | 0.48        |              |
|     | 95% CI            | Low. 0.235        | -                | -    | -      | -           | -        | -        | -      | -         | -0.867                  | -                                             |             |              |
|     | Upp. 1.575        | -                 | -                | -    | -      | -           | -        | -        | -      | -         | 0.083                   | -                                             |             |              |
| M4  | Estimate          | 0.974             | -                | -    | -      | -           | 0.331    | 0.419    | -      | -         | -0.367                  | -                                             | 0.91        |              |
|     | 95% CI            | Low. 0.263        | -                | -    | -      | -           | -0.283   | -0.127   | -      | -         | -0.850                  | -                                             |             |              |
|     | Upp. 1.685        | -                 | -                | -    | -      | -           | 0.945    | 0.966    | -      | -         | 0.116                   | -                                             |             |              |
| M5  | Estimate          | 0.964             | -                | -    | -      | -           | 0.352    | 0.428    | -      | -         | -                       | -                                             | 0.97        |              |
|     | 95% CI            | Low. 0.238        | -                | -    | -      | -           | -0.247   | -0.113   | -      | -         | -                       | -                                             |             |              |
|     | Upp. 1.691        | -                 | -                | -    | -      | -           | 0.950    | 0.969    | -      | -         | -                       | -                                             |             |              |
| M6  | <b>Estimate</b>   | <b>0.904</b>      | -                | -    | -      | -           | -        | -        | -      | -         | -                       | -                                             | <b>1.00</b> |              |
|     | <b>95% CI</b>     | <b>Low. 0.204</b> | -                | -    | -      | -           | -        | -        | -      | -         | -                       | -                                             |             |              |
|     | <b>Upp. 1.603</b> | -                 | -                | -    | -      | -           | -        | -        | -      | -         | -                       | -                                             |             |              |
| M7  | Estimate          | 0.926             | -                | -    | -      | -           | 0.323    | -        | -      | -         | -0.371                  | -                                             | 1.38        |              |
|     | 95% CI            | Low. 0.265        | -                | -    | -      | -           | -0.285   | -        | -      | -         | -0.842                  | -                                             |             |              |
|     | Upp. 1.587        | -                 | -                | -    | -      | -           | 0.931    | -        | -      | -         | 0.100                   | -                                             |             |              |
| M8  | Estimate          | 0.919             | -                | -    | -      | -           | 0.343    | -        | -      | -         | -                       | -                                             | 1.63        |              |
|     | 95% CI            | Low. 0.236        | -                | -    | -      | -           | -0.248   | -        | -      | -         | -                       | -                                             |             |              |
|     | Upp. 1.602        | -                 | -                | -    | -      | -           | 0.934    | -        | -      | -         | -                       | -                                             |             |              |
| M9  | Estimate          | 0.959             | -                | -    | -      | -           | -0.163   | 0.431    | -      | -         | -0.379                  | -                                             | 1.73        |              |
|     | 95% CI            | Low. 0.226        | -                | -    | -      | -           | -0.641   | -0.123   | -      | -         | -0.867                  | -                                             |             |              |
|     | Upp. 1.692        | -                 | -                | -    | -      | -           | 0.315    | 0.986    | -      | -         | 0.109                   | -                                             |             |              |
| M10 | Estimate          | 0.958             | -                | -    | -      | -           | -0.187   | 0.441    | -      | -         | -                       | -                                             | 1.88        |              |
|     | 95% CI            | Low. 0.198        | -                | -    | -      | -           | -0.667   | -0.108   | -      | -         | -                       | -                                             |             |              |
|     | Upp. 1.718        | -                 | -                | -    | -      | -           | 0.292    | 0.990    | -      | -         | -                       | -                                             |             |              |
| M11 | Estimate          | 0.943             | -                | -    | -      | -           | -        | 0.410    | -0.135 | -         | -0.403                  | -                                             | 1.92        |              |
|     | 95% CI            | Low. 0.240        | -                | -    | -      | -           | -        | -0.138   | -0.642 | -         | -0.890                  | -                                             |             |              |
|     | Upp. 1.645        | -                 | -                | -    | -      | -           | -        | 0.959    | 0.373  | -         | 0.084                   | -                                             |             |              |



Table B.7A. [Continued]

|     |            | Intercept  | Month (ref: May) |      |        | Fallow deer | Roe deer | Red deer | Moose  | Wild boar | Mean height<br>field layer | Coefficient of variance<br>of height field layer | Temperature | $\Delta$ AIC |
|-----|------------|------------|------------------|------|--------|-------------|----------|----------|--------|-----------|----------------------------|--------------------------------------------------|-------------|--------------|
|     |            |            | June             | July | August |             |          |          |        |           |                            |                                                  |             |              |
| M12 | Estimate   | 0.951      | -                | -    | -      | -           | -        | 0.415    | -      | -         | -0.378                     | -0.098                                           | 1.95        |              |
|     | 95% CI     | Low. 0.238 | -                | -    | -      | -           | -        | -0.132   | -      | -         | -0.866                     | -0.574                                           |             |              |
|     | Upp. 1.663 | -          | -                | -    | -      | -           | -        | 0.962    | -      | -         | 0.109                      | 0.378                                            |             |              |
| M13 | Estimate   | 0.951      | -                | -    | -      | -0.111      | -        | 0.418    | -      | -         | -0.375                     | -                                                | 2.05        |              |
|     | 95% CI     | Low. 0.247 | -                | -    | -      | -0.695      | -        | -0.131   | -      | -         | -0.863                     | -                                                |             |              |
|     | Upp. 1.654 | -          | -                | -    | 0.473  | -           | -        | 0.968    | -      | -         | 0.112                      | -                                                |             |              |
| M14 | Estimate   | 0.946      | -                | -    | -      | -           | -        | 0.422    | -      | -         | -                          | -0.133                                           | 2.07        |              |
|     | 95% CI     | Low. 0.213 | -                | -    | -      | -           | -        | -0.120   | -      | -         | -                          | -0.609                                           |             |              |
|     | Upp. 1.679 | -          | -                | -    | -      | -           | -        | 0.964    | -      | -         | -                          | 0.341                                            |             |              |
| M15 | Estimate   | 0.950      | -                | -    | -      | -           | -        | 0.415    | -      | 0.057     | -0.388                     | -                                                | 2.13        |              |
|     | 95% CI     | Low. 0.233 | -                | -    | -      | -           | -        | -0.132   | -      | -0.415    | -0.875                     | -                                                |             |              |
|     | Upp. 1.667 | -          | -                | -    | -      | -           | -        | 0.963    | -      | 0.529     | 0.098                      | -                                                |             |              |
| M16 | Estimate   | 0.943      | -                | -    | -      | -0.162      | -        | 0.426    | -      | -         | -                          | -                                                | 2.18        |              |
|     | 95% CI     | Low. 0.228 | -                | -    | -      | -0.741      | -        | -0.118   | -      | -         | -                          | -                                                |             |              |
|     | Upp. 1.658 | -          | -                | -    | 0.417  | -           | -        | 0.970    | -      | -         | -                          | -                                                |             |              |
| M17 | Estimate   | 0.896      | -                | -    | -      | -           | -        | -        | -0.154 | -         | -0.408                     | -                                                | 2.26        |              |
|     | 95% CI     | Low. 0.243 | -                | -    | -      | -           | -        | -        | -0.644 | -         | -0.882                     | -                                                |             |              |
|     | Upp. 1.549 | -          | -                | -    | -      | -           | -        | -        | 0.337  | -         | 0.067                      | -                                                |             |              |
| M18 | Estimate   | 0.911      | -                | -    | -      | -           | -0.135   | -        | -      | -         | -0.385                     | -                                                | 2.30        |              |
|     | 95% CI     | Low. 0.228 | -                | -    | -      | -           | -0.602   | -        | -      | -         | -0.862                     | -                                                |             |              |
|     | Upp. 1.593 | -          | -                | -    | -      | 0.331       | -        | -        | -      | -         | 0.092                      | -                                                |             |              |
| M19 | Estimate   | 0.905      | -                | -    | -      | -           | -        | -        | -      | -         | -0.381                     | -0.105                                           | 2.36        |              |
|     | 95% CI     | Low. 0.240 | -                | -    | -      | -           | -        | -        | -      | -         | -0.858                     | -0.572                                           |             |              |
|     | Upp. 1.570 | -          | -                | -    | -      | -           | -        | -        | -      | -         | 0.095                      | 0.363                                            |             |              |
| M20 | Estimate   | 0.945      | -                | -    | -      | -           | -        | 0.425    | -      | -         | -                          | -                                                | 2.39        |              |
|     | 95% CI     | Low. 0.206 | -                | -    | -      | -           | -        | -0.116   | -      | -         | -                          | -                                                |             |              |
|     | Upp. 1.684 | -          | -                | -    | -      | -           | -        | 0.967    | -      | -         | -                          | -                                                |             |              |
| M21 | Estimate   | 0.987      | -                | -    | -      | -           | -0.212   | 0.376    | 0.448  | -         | -                          | -                                                | 2.40        |              |
|     | 95% CI     | Low. 0.232 | -                | -    | -      | -           | -0.698   | -0.236   | -0.102 | -         | -                          | -                                                |             |              |
|     | Upp. 1.743 | -          | -                | -    | -      | 0.273       | 0.987    | 0.998    | -      | -         | -                          | -                                                |             |              |
| M22 | Estimate   | 0.944      | -                | -    | -      | -           | -        | 0.423    | -      | 0.057     | -                          | -                                                | 2.42        |              |
|     | 95% CI     | Low. 0.206 | -                | -    | -      | -           | -        | -0.119   | -      | -0.412    | -                          | -                                                |             |              |
|     | Upp. 1.683 | -          | -                | -    | -      | -           | -        | 0.965    | -      | 0.526     | -                          | -                                                |             |              |
| M23 | Estimate   | 0.903      | -                | -    | -      | -0.110      | -        | -        | -      | -         | -0.379                     | -                                                | 2.49        |              |
|     | 95% CI     | Low. 0.248 | -                | -    | -      | -0.679      | -        | -        | -      | -         | -0.856                     | -                                                |             |              |
|     | Upp. 1.558 | -          | -                | -    | 0.460  | -           | -        | -        | -      | -         | 0.098                      | -                                                |             |              |

Table B.7A. [Continued]

|     |            | Intercept  | Month (ref: May) |      |        | Fallow deer | Roe deer | Red deer | Moose  | Wild boar | Mean height<br>field layer | Coefficient of variance<br>of height field layer | Temperature | $\Delta$ AIC |
|-----|------------|------------|------------------|------|--------|-------------|----------|----------|--------|-----------|----------------------------|--------------------------------------------------|-------------|--------------|
|     |            |            | June             | July | August |             |          |          |        |           |                            |                                                  |             |              |
| M24 | Estimate   | 0.906      | -                | -    | -      | -           | -        | -        | -      | -         | 0.073                      | -0.392                                           | -           | 2.53         |
|     | 95% CI     | Low. 0.235 | -                | -    | -      | -           | -        | -        | -      | -         | -0.396                     | -0.868                                           | -           |              |
|     | Upp. 1.576 | -          | -                | -    | -      | -           | -        | -        | -      | -         | 0.542                      | 0.083                                            | -           |              |
| M25 | Estimate   | 0.992      | -                | -    | -      | -           | -0.186   | 0.352    | 0.437  | -         | -                          | -0.355                                           | -           | 2.55         |
|     | 95% CI     | Low. 0.256 | -                | -    | -      | -           | -0.669   | -0.274   | -0.117 | -         | -                          | -0.841                                           | -           |              |
|     | Upp. 1.727 | -          | -                | -    | -      | -           | 0.298    | 0.979    | 0.992  | -         | -                          | 0.131                                            | -           |              |
| M26 | Estimate   | 0.969      | -                | -    | -      | -           | -        | 0.366    | 0.424  | -         | -                          | -                                                | -0.156      | 2.62         |
|     | 95% CI     | Low. 0.248 | -                | -    | -      | -           | -        | -0.234   | -0.118 | -         | -                          | -                                                | -0.628      |              |
|     | Upp. 1.690 | -          | -                | -    | -      | -           | -        | 0.966    | 0.965  | -         | -                          | -                                                | 0.317       |              |
| M27 | Estimate   | 0.904      | -                | -    | -      | -           | -        | -        | -      | -         | -                          | -                                                | -0.142      | 2.65         |
|     | 95% CI     | Low. 0.212 | -                | -    | -      | -           | -        | -        | -      | -         | -                          | -                                                | -0.609      |              |
|     | Upp. 1.595 | -          | -                | -    | -      | -           | -        | -        | -      | -         | -                          | -                                                | 0.326       |              |
| M28 | Estimate   | 0.913      | -                | -    | -      | -           | -0.160   | -        | -      | -         | -                          | -                                                | -           | 2.66         |
|     | 95% CI     | Low. 0.197 | -                | -    | -      | -           | -0.628   | -        | -      | -         | -                          | -                                                | -           |              |
|     | Upp. 1.628 | -          | -                | -    | -      | -           | 0.309    | -        | -      | -         | -                          | -                                                | -           |              |
| M29 | Estimate   | 0.966      | -                | -    | -      | -           | -        | 0.345    | 0.411  | -0.161    | -                          | -0.382                                           | -           | 2.75         |
|     | 95% CI     | Low. 0.273 | -                | -    | -      | -           | -        | -0.270   | -0.137 | -0.667    | -                          | -0.865                                           | -           |              |
|     | Upp. 1.660 | -          | -                | -    | -      | -           | -        | 0.960    | 0.959  | 0.344     | -                          | 0.100                                            | -           |              |
| M30 | Estimate   | 0.897      | -                | -    | -      | -0.162      | -        | -        | -      | -         | -                          | -                                                | -           | 2.80         |
|     | 95% CI     | Low. 0.226 | -                | -    | -      | 0.727       | -        | -        | -      | -         | -                          | -                                                | -           |              |
|     | Upp. 1.569 | -          | -                | -    | -      | 0.404       | -        | -        | -      | -         | -                          | -                                                | -           |              |
| M31 | Estimate   | 0.977      | -                | -    | -      | -           | -        | 0.343    | 0.416  | -         | -                          | -0.354                                           | -0.121      | 2.80         |
|     | 95% CI     | Low. 0.269 | -                | -    | -      | -           | -        | -0.271   | -0.130 | -         | -                          | -0.839                                           | -0.597      |              |
|     | Upp. 1.686 | -          | -                | -    | -      | -           | -        | 0.958    | 0.963  | -         | -                          | 0.131                                            | 0.354       |              |
| M32 | Estimate   | 0.967      | -                | -    | -      | -0.155      | -        | 0.348    | 0.431  | -         | -                          | -                                                | -           | 2.88         |
|     | 95% CI     | Low. 0.259 | -                | -    | -      | -0.743      | -        | -0.250   | -0.113 | -         | -                          | -                                                | -           |              |
|     | Upp. 1.674 | -          | -                | -    | -      | 0.432       | -        | 0.946    | 0.975  | -         | -                          | -                                                | -           |              |
| M33 | Estimate   | 0.899      | -                | -    | -      | -           | -        | -        | -      | -0.102    | -                          | -                                                | -           | 2.94         |
|     | 95% CI     | Low. 0.208 | -                | -    | -      | -           | -        | -        | -      | -0.590    | -                          | -                                                | -           |              |
|     | Upp. 1.589 | -          | -                | -    | -      | -           | -        | -        | -      | 0.385     | -                          | -                                                | -           |              |
| M34 | Estimate   | 0.960      | -                | -    | -      | -           | -        | 0.364    | 0.421  | -0.113    | -                          | -                                                | -           | 2.96         |
|     | 95% CI     | Low. 0.244 | -                | -    | -      | -           | -        | -0.236   | -0.120 | -0.613    | -                          | -                                                | -           |              |
|     | Upp. 1.675 | -          | -                | -    | -      | -           | -        | 0.964    | 0.963  | 0.387     | -                          | -                                                | -           |              |
| M35 | Estimate   | 0.903      | -                | -    | -      | -           | -        | -        | -      | -         | 0.073                      | -                                                | -           | 3.02         |
|     | 95% CI     | Low. 0.205 | -                | -    | -      | -           | -        | -        | -      | -         | -0.394                     | -                                                | -           |              |
|     | Upp. 1.602 | -          | -                | -    | -      | -           | -        | -        | -      | -         | 0.540                      | -                                                | -           |              |

Table B.7A. [Continued]

|     |          | Intercept | Month (ref: May) |        |        | Fallow deer | Roe deer | Red deer | Moose  | Wild boar | Mean height<br>field layer | Coefficient of variance<br>of height field layer | Temperature | $\Delta$ AIC |
|-----|----------|-----------|------------------|--------|--------|-------------|----------|----------|--------|-----------|----------------------------|--------------------------------------------------|-------------|--------------|
|     |          |           | June             | July   | August |             |          |          |        |           |                            |                                                  |             |              |
| M36 | Estimate | 0.977     | -                | -      | -      | -0.104      | -        | 0.328    | 0.422  | -         | -                          | -0.355                                           | -           | 3.02         |
|     | 95% CI   | Low.      | 0.276            | -      | -      | -           | -0.697   | -        | -0.285 | -0.127    | -                          | -0.840                                           | -           |              |
|     | Upp.     | 1.679     | -                | -      | -      | 0.489       | -        | 0.941    | 0.970  | -         | -                          | 0.131                                            | -           |              |
| M37 | Estimate | 0.916     | -                | -      | -      | -           | -        | 0.340    | -      | -0.179    | -                          | -0.386                                           | -           | 3.05         |
|     | 95% CI   | Low.      | 0.275            | -      | -      | -           | -        | -0.271   | -      | -0.667    | -                          | -0.855                                           | -           |              |
|     | Upp.     | 1.557     | -                | -      | -      | -           | -        | 0.951    | -      | 0.309     | -                          | 0.082                                            | -           |              |
| M38 | Estimate | 0.974     | -                | -      | -      | -           | -        | 0.333    | 0.417  | -         | 0.065                      | -0.367                                           | -           | 3.06         |
|     | 95% CI   | Low.      | 0.264            | -      | -      | -           | -        | -0.281   | -0.130 | -         | -0.404                     | -0.850                                           | -           |              |
|     | Upp.     | 1.685     | -                | -      | -      | -           | -        | 0.948    | 0.964  | -         | 0.533                      | 0.117                                            | -           |              |
| M39 | Estimate | 0.964     | -                | -      | -      | -           | -        | 0.354    | 0.425  | -         | 0.066                      | -                                                | -           | 3.08         |
|     | 95% CI   | Low.      | 0.239            | -      | -      | -           | -        | -0.244   | -0.117 | -         | -0.400                     | -                                                | -           |              |
|     | Upp.     | 1.688     | -                | -      | -      | -           | -        | 0.952    | 0.966  | -         | 0.531                      | -                                                | -           |              |
| M40 | Estimate | 0.937     | -                | -      | -      | -           | -0.153   | 0.337    | -      | -         | -                          | -0.361                                           | -           | 3.15         |
|     | 95% CI   | Low.      | 0.258            | -      | -      | -           | -0.622   | -0.280   | -      | -         | -                          | -0.835                                           | -           |              |
|     | Upp.     | 1.617     | -                | -      | -      | -           | 0.317    | 0.954    | -      | -         | -                          | 0.112                                            | -           |              |
| M41 | Estimate | 0.921     | -                | -      | -      | -           | -        | 0.357    | -      | -         | -                          | -                                                | -0.164      | 3.18         |
|     | 95% CI   | Low.      | 0.246            | -      | -      | -           | -        | -0.233   | -      | -         | -                          | -                                                | -0.628      |              |
|     | Upp.     | 1.596     | -                | -      | -      | -           | -        | 0.947    | -      | -         | -                          | -                                                | 0.300       |              |
| M42 | Estimate | 0.928     | -                | -      | -      | -           | -        | 0.335    | -      | -         | -                          | -0.357                                           | -0.128      | 3.19         |
|     | 95% CI   | Low.      | 0.271            | -      | -      | -           | -        | -0.271   | -      | -         | -                          | -0.830                                           | -0.593      |              |
|     | Upp.     | 1.585     | -                | -      | -      | -           | -        | 0.941    | -      | -         | -                          | 0.116                                            | 0.338       |              |
| M43 | Estimate | 0.935     | -                | -      | -      | -           | -0.180   | 0.360    | -      | -         | -                          | -                                                | -           | 3.20         |
|     | 95% CI   | Low.      | 0.230            | -      | -      | -           | -0.653   | -0.240   | -      | -         | -                          | -                                                | -           |              |
|     | Upp.     | 1.639     | -                | -      | -      | -           | 0.292    | 0.960    | -      | -         | -                          | -                                                | -           |              |
| M44 | Estimate | 1.191     | -0.892           | 0.271  | -0.380 | -           | -        | -        | 0.476  | -         | -                          | -0.447                                           | -           | 3.32         |
|     | 95% CI   | Low.      | -0.149           | -2.460 | -1.237 | -1.914      | -        | -        | -      | -0.081    | -                          | -0.942                                           | -           |              |
|     | Upp.     | 2.530     | 0.676            | 1.779  | 1.513  | -           | -        | -        | 1.033  | -         | -                          | 0.048                                            | -           |              |
| M45 | Estimate | 0.927     | -                | -      | -      | -           | -        | 0.327    | -      | -         | 0.082                      | -0.370                                           | -           | 3.44         |
|     | 95% CI   | Low.      | 0.266            | -      | -      | -           | -        | -0.282   | -      | -         | -0.383                     | -0.842                                           | -           |              |
|     | Upp.     | 1.587     | -                | -      | -      | -           | -        | 0.935    | -      | -         | 0.546                      | 0.101                                            | -           |              |
| M46 | Estimate | 0.926     | -                | -      | -      | -0.094      | -        | 0.318    | -      | -         | -                          | -0.360                                           | -           | 3.46         |
|     | 95% CI   | Low.      | 0.275            | -      | -      | -0.672      | -        | -0.290   | -      | -         | -                          | -0.833                                           | -           |              |
|     | Upp.     | 1.577     | -                | -      | -      | 0.484       | -        | 0.925    | -      | -         | -                          | 0.114                                            | -           |              |
| M47 | Estimate | 0.913     | -                | -      | -      | -           | -        | 0.357    | -      | -0.135    | -                          | -                                                | -           | 3.48         |
|     | 95% CI   | Low.      | 0.243            | -      | -      | -           | -        | -0.237   | -      | -0.620    | -                          | -                                                | -           |              |
|     | Upp.     | 1.582     | -                | -      | -      | -           | -        | 0.952    | -      | 0.350     | -                          | -                                                | -           |              |

Table B.7A. [Continued]

|     |          | Intercept | Month (ref: May) |        |        | Fallow deer | Roe deer | Red deer | Moose  | Wild boar | Mean height<br>field layer | Coefficient of variance<br>of height field layer | Temperature | $\Delta$ AIC |
|-----|----------|-----------|------------------|--------|--------|-------------|----------|----------|--------|-----------|----------------------------|--------------------------------------------------|-------------|--------------|
|     |          |           | June             | July   | August |             |          |          |        |           |                            |                                                  |             |              |
| M48 | Estimate | 0.917     | -                | -      | -      | -0.146      | -        | 0.335    | -      | -         | -                          | -                                                | 3.53        |              |
|     | 95% CI   | Low.      | 0.255            | -      | -      | -           | -0.720   | -        | -0.255 | -         | -                          | -                                                |             |              |
|     | Upp.     | 1.578     | -                | -      | -      | 0.428       | -        | 0.925    | -      | -         | -                          | -                                                |             |              |
| M49 | Estimate | 0.953     | -                | -      | -      | -           | -0.171   | -        | 0.424  | -0.147    | -                          | -0.396                                           | 3.64        |              |
|     | 95% CI   | Low.      | 0.233            | -      | -      | -           | -0.650   | -        | -0.132 | -0.660    | -                          | -0.885                                           |             |              |
|     | Upp.     | 1.673     | -                | -      | -      | 0.308       | -        | 0.979    | 0.366  | -         | 0.0938                     | -                                                |             |              |
| M50 | Estimate | 0.918     | -                | -      | -      | -           | -        | 0.346    | -      | -         | 0.083                      | -                                                | 3.65        |              |
|     | 95% CI   | Low.      | 0.238            | -      | -      | -           | -        | -0.245   | -      | -         | -0.380                     | -                                                |             |              |
|     | Upp.     | 1.599     | -                | -      | -      | -           | -        | 0.937    | -      | -         | 0.546                      | -                                                |             |              |
| M51 | Estimate | 0.532     | -0.313           | 1.415  | 0.319  | -           | -        | -        | 0.485  | -         | -                          | -0.438                                           | -0.504      | 3.68         |
|     | 95% CI   | Low.      | -1.097           | -2.093 | -0.894 | -1.544      | -        | -        | -0.079 | -         | -                          | -0.938                                           | -1.250      |              |
|     | Upp.     | 2.161     | 1.467            | 3.723  | 2.182  | -           | -        | -        | 1.048  | -         | -                          | 0.062                                            | 0.241       |              |
| M52 | Estimate | 0.959     | -                | -      | -      | -           | -0.179   | -        | 0.438  | -         | -                          | -                                                | -0.123      | 3.71         |
|     | 95% CI   | Low.      | 0.206            | -      | -      | -           | -0.658   | -        | -0.112 | -         | -                          | -                                                | -0.601      |              |
|     | Upp.     | 1.711     | -                | -      | -      | -           | 0.301    | -        | 0.987  | -         | -                          | -                                                | 0.355       |              |
| M53 | Estimate | 0.959     | -                | -      | -      | -           | -0.157   | -        | 0.429  | -         | -                          | -0.370                                           | -0.088      | 3.76         |
|     | 95% CI   | Low.      | 0.230            | -      | -      | -           | -0.635   | -        | -0.125 | -         | -                          | -0.860                                           | -0.567      |              |
|     | Upp.     | 1.689     | -                | -      | -      | -           | 0.321    | -        | 0.984  | -         | -                          | 0.119                                            | 0.391       |              |
| M54 | Estimate | 0.956     | -                | -      | -      | -0.154      | -0.180   | -        | 0.442  | -         | -                          | -                                                | -           | 3.80         |
|     | 95% CI   | Low.      | 0.220            | -      | -      | -0.740      | -0.647   | -        | -0.110 | -         | -                          | -                                                | -           |              |
|     | Upp.     | 1.693     | -                | -      | -      | 0.432       | 0.297    | -        | 0.994  | -         | -                          | -                                                | -           |              |
| M55 | Estimate | 0.960     | -                | -      | -      | -0.102      | -0.158   | -        | 0.433  | -         | -                          | -0.367                                           | -           | 3.84         |
|     | 95% CI   | Low.      | 0.239            | -      | -      | -0.691      | -0.635   | -        | -0.124 | -         | -                          | -0.857                                           | -           |              |
|     | Upp.     | 1.681     | -                | -      | -      | 0.487       | 0.318    | -        | 0.989  | -         | -                          | 0.123                                            | -           |              |
| M56 | Estimate | 0.960     | -                | -      | -      | -           | -0.174   | -        | 0.429  | -         | 0.081                      | -0.380                                           | -           | 3.85         |
|     | 95% CI   | Low.      | 0.226            | -      | -      | -           | -0.657   | -        | -0.126 | -         | -0.403                     | -0.868                                           | -           |              |
|     | Upp.     | 1.695     | -                | -      | -      | -           | 0.310    | -        | 0.984  | -         | 0.566                      | 0.109                                            | -           |              |
| M57 | Estimate | 0.943     | -                | -      | -      | -           | -        | -        | 0.406  | -0.156    | -                          | -0.393                                           | -0.111      | 3.85         |
|     | 95% CI   | Low.      | 0.246            | -      | -      | -           | -        | -        | -0.142 | -0.654    | -                          | -0.881                                           | -0.588      |              |
|     | Upp.     | 1.641     | -                | -      | -      | -           | -        | -        | 0.955  | 0.362     | -                          | 0.095                                            | 0.366       |              |
| M58 | Estimate | 0.944     | -                | -      | -      | -0.170      | -        | -        | 0.422  | -         | -                          | -                                                | -0.139      | 3.92         |
|     | 95% CI   | Low.      | 0.237            | -      | -      | -0.751      | -        | -        | -0.122 | -         | -                          | -                                                | -0.609      |              |
|     | Upp.     | 1.652     | -                | -      | -      | 0.410       | -        | -        | 0.966  | -         | -                          | -                                                | 0.331       |              |
| M60 | Estimate | 0.955     | -                | -      | -      | -           | -0.193   | -        | 0.435  | -0.094    | -                          | -                                                | -           | 3.94         |
|     | 95% CI   | Low.      | 0.202            | -      | -      | -           | -0.674   | -        | -0.114 | -0.601    | -                          | -                                                | -           |              |
|     | Upp.     | 1.708     | -                | -      | -      | -           | 0.288    | -        | 0.984  | 0.414     | -                          | -                                                | -           |              |



Table B.7B. [Continued]

|     |          |      | <i>Intercept</i> | <i>Month (ref: May)</i> |             |               | <i>Deer</i> | <i>Wild boar</i> | <i>Mean height field layer</i> | <i>Coefficient of variance of height field layer</i> | <i>Temperature</i> | $\Delta$ AIC |
|-----|----------|------|------------------|-------------------------|-------------|---------------|-------------|------------------|--------------------------------|------------------------------------------------------|--------------------|--------------|
|     |          |      |                  | <i>June</i>             | <i>July</i> | <i>August</i> |             |                  |                                |                                                      |                    |              |
| M8  | Estimate |      | 0.899            | -                       | -           | -             | -           | -0.102           | -                              | -                                                    | -                  | 2.46         |
|     | 95% CI   | Low. | 0.208            | -                       | -           | -             | -           | -0.590           | -                              | -                                                    | -                  |              |
|     |          | Upp. | 1.589            | -                       | -           | -             | -           | 0.385            | -                              | -                                                    | -                  |              |
| M9  | Estimate |      | 0.903            | -                       | -           | -             | -           | -                | 0.073                          | -                                                    | -                  | 2.54         |
|     | 95% CI   | Low. | 0.205            | -                       | -           | -             | -           | -                | -0.394                         | -                                                    | -                  |              |
|     |          | Upp. | 1.602            | -                       | -           | -             | -           | -                | 0.540                          | -                                                    | -                  |              |
| M10 | Estimate |      | 0.904            | -                       | -           | -             | 0.010       | -                | -                              | -                                                    | -                  | 2.63         |
|     | 95% CI   | Low. | 0.203            | -                       | -           | -             | -0.467      | -                | -                              | -                                                    | -                  |              |
|     |          | Upp. | 1.605            | -                       | -           | -             | 0.489       | -                | -                              | -                                                    | -                  |              |
| M11 | Estimate |      | 0.896            | -                       | -           | -             | -           | -0.167           | -                              | -0.396                                               | -0.121             | 3.61         |
|     | 95% CI   | Low. | 0.250            | -                       | -           | -             | -           | -0.658           | -                              | -0.871                                               | -0.589             |              |
|     |          | Upp. | 1.541            | -                       | -           | -             | -           | 0.324            | -                              | 0.079                                                | 0.347              |              |
| M12 | Estimate |      | 0.907            | -                       | -           | -             | -           | -                | 0.113                          | -0.378                                               | -0.137             | 3.82         |
|     | 95% CI   | Low. | 0.242            | -                       | -           | -             | -           | -                | -0.380                         | -0.855                                               | -0.623             |              |
|     |          | Upp. | 1.572            | -                       | -           | -             | -           | -                | 0.605                          | 0.100                                                | 0.350              |              |
| M13 | Estimate |      | 0.897            | -                       | -           | -             | -           | -0.154           | 0.073                          | -0.408                                               | -                  | 3.86         |
|     | 95% CI   | Low. | 0.243            | -                       | -           | -             | -           | -0.645           | -0.393                         | -0.883                                               | -                  |              |
|     |          | Upp. | 1.550            | -                       | -           | -             | -           | 0.337            | 0.539                          | 0.067                                                | -                  |              |
| M14 | Estimate |      | 1.096            | -0.761                  | 0.243       | -0.299        | -           | -                | -                              | -0.445                                               | -                  | 3.92         |
|     | 95% CI   | Low. | -0.163           | -2.261                  | -1.211      | -1.775        | -           | -                | -                              | -0.927                                               | -                  |              |
|     |          | Upp. | 2.356            | 0.738                   | 1.697       | 1.177         | -           | -                | -                              | 0.037                                                | -                  |              |
| M15 | Estimate |      | 0.896            | -                       | -           | -             | 0.006       | -0.154           | -                              | -0.408                                               | -                  | 3.96         |
|     | 95% CI   | Low. | 0.242            | -                       | -           | -             | -0.462      | -0.644           | -                              | -0.883                                               | -                  |              |
|     |          | Upp. | 1.549            | -                       | -           | -             | 0.473       | 0.337            | -                              | 0.067                                                | -                  |              |

Table B.7C. Standardized model estimates with 95% confidence intervals for the analysis of the association between the presence of questing *I. ricinus* nymphs and adults, and ungulate visitation frequencies, for the ungulate species summed. Models presented are the best performing GLMMs with a binomial distribution. The final model selected on which interpretations were based is highlighted in bold. M = model.

|            |                 |             | Intercept    | Month (ref: May) |      |        | Ungulates | Mean height<br>field layer | Coefficient of variance<br>of height field layer | Temperature | $\Delta$ AIC |
|------------|-----------------|-------------|--------------|------------------|------|--------|-----------|----------------------------|--------------------------------------------------|-------------|--------------|
|            |                 |             |              | June             | July | August |           |                            |                                                  |             |              |
| M1         | Estimate        |             | 0.905        | -                | -    | -      | -         | -0.392                     | -                                                | 0.00        |              |
|            | 95% CI          | Low.        | 0.235        | -                | -    | -      | -         | -0.867                     | -                                                |             |              |
|            |                 | Upp.        | 1.575        | -                | -    | -      | -         | 0.083                      | -                                                |             |              |
| <b>M2</b>  | <b>Estimate</b> |             | <b>0.904</b> | -                | -    | -      | -         | -                          | -                                                | <b>0.52</b> |              |
|            | <b>95% CI</b>   | <b>Low.</b> | <b>0.204</b> | -                | -    | -      | -         | -                          | -                                                |             |              |
|            |                 | <b>Upp.</b> | <b>1.603</b> | -                | -    | -      | -         | -                          | -                                                |             |              |
| M3         | Estimate        |             | 0.904        | -                | -    | -      | -0.232    | -0.384                     | -                                                | 1.34        |              |
|            | 95% CI          | Low.        | 0.257        | -                | -    | -      | -0.747    | -0.855                     | -                                                |             |              |
|            |                 | Upp.        | 1.552        | -                | -    | -      | 0.282     | 0.087                      | -                                                |             |              |
| M4         | Estimate        |             | 0.902        | -                | -    | -      | -0.247    | -                          | -                                                | 1.76        |              |
|            | 95% CI          | Low.        | 0.229        | -                | -    | -      | -0.774    | -                          | -                                                |             |              |
|            |                 | Upp.        | 1.575        | -                | -    | -      | 0.280     | -                          | -                                                |             |              |
| M5         | Estimate        |             | 0.905        | -                | -    | -      | -         | -0.381                     | -0.105                                           | 1.88        |              |
|            | 95% CI          | Low.        | 0.240        | -                | -    | -      | -         | -0.858                     | -0.572                                           |             |              |
|            |                 | Upp.        | 1.570        | -                | -    | -      | -         | 0.095                      | 0.363                                            |             |              |
| M6         | Estimate        |             | 0.906        | -                | -    | -      | 0.073     | -0.392                     | -                                                | 2.05        |              |
|            | 95% CI          | Low.        | 0.235        | -                | -    | -      | -0.396    | -0.868                     | -                                                |             |              |
|            |                 | Upp.        | 1.576        | -                | -    | -      | 0.542     | 0.083                      | -                                                |             |              |
| M7         | Estimate        |             | 0.904        | -                | -    | -      | -         | -                          | -0.142                                           | 2.17        |              |
|            | 95% CI          | Low.        | 0.212        | -                | -    | -      | -         | -                          | -0.609                                           |             |              |
|            |                 | Upp.        | 1.595        | -                | -    | -      | -         | -                          | 0.326                                            |             |              |
| M8         | Estimate        |             | 0.903        | -                | -    | -      | 0.073     | -                          | -                                                | 2.54        |              |
|            | 95% CI          | Low.        | 0.205        | -                | -    | -      | -0.394    | -                          | -                                                |             |              |
|            |                 | Upp.        | 1.602        | -                | -    | -      | 0.540     | -                          | -                                                |             |              |
| M9         | Estimate        |             | 0.904        | -                | -    | -      | -0.243    | -0.370                     | -0.120                                           | 3.20        |              |
|            | 95% CI          | Low.        | 0.263        | -                | -    | -      | -0.762    | -0.843                     | -0.587                                           |             |              |
|            |                 | Upp.        | 1.545        | -                | -    | -      | 0.276     | 0.103                      | 0.347                                            |             |              |
| M10        | Estimate        |             | 0.902        | -                | -    | -      | -0.263    | -                          | -0.160                                           | 3.36        |              |
|            | 95% CI          | Low.        | 0.241        | -                | -    | -      | -0.796    | -                          | -0.626                                           |             |              |
|            |                 | Upp.        | 1.563        | -                | -    | -      | 0.270     | -                          | 0.307                                            |             |              |
| <b>M11</b> | Estimate        |             | 0.906        | -                | -    | -      | -0.231    | -0.384                     | -                                                | 3.44        |              |
|            | 95% CI          | Low.        | 0.257        | -                | -    | -      | -0.744    | -0.856                     | -                                                |             |              |
|            |                 | Upp.        | 1.554        | -                | -    | -      | 0.282     | 0.087                      | -                                                |             |              |

Table B.7C. [Continued]

|     |          | <i>Intercept</i> | <i>Month (ref: May)</i> |             |               | <i>Ungulates</i> | <i>Mean height<br/>field layer</i> | <i>Coefficient of variance<br/>of height field layer</i> | <i>Temperature</i> | $\Delta$ AIC |
|-----|----------|------------------|-------------------------|-------------|---------------|------------------|------------------------------------|----------------------------------------------------------|--------------------|--------------|
|     |          |                  | <i>June</i>             | <i>July</i> | <i>August</i> |                  |                                    |                                                          |                    |              |
| M12 | Estimate | 0.907            | -                       | -           | -             | -                | 0.113                              | -0.378                                                   | -0.137             | 3.82         |
|     | 95% CI   | Low.             | 0.242                   | -           | -             | -                | -0.380                             | -0.855                                                   | -0.623             |              |
|     |          | Upp.             | 1.572                   | -           | -             | -                | 0.605                              | 0.100                                                    | 0.350              |              |
| M13 | Estimate | 0.903            | -                       | -           | -             | -0.244           | 0.069                              | -                                                        | -                  | 3.82         |
|     | 95% CI   | Low.             | 0.230                   | -           | -             | -                | -0.769                             | -                                                        | -                  |              |
|     |          | Upp.             | 1.575                   | -           | -             | -                | 0.281                              | -                                                        | -                  |              |
| M14 | Estimate | 1.096            | -0.761                  | 0.243       | -0.299        | -                | -                                  | -0.445                                                   | -                  | 3.92         |
|     | 95% CI   | Low.             | -0.163                  | -2.261      | -1.211        | -1.775           | -                                  | -                                                        | -0.927             |              |
|     |          | Upp.             | 2.356                   | 0.738       | 1.697         | 1.177            | -                                  | -                                                        | 0.037              |              |



Table B.8A. Standardized model estimates with 95% confidence intervals for the analysis of the association between the abundance of questing *I. ricinus* ticks (larvae, nymphs and adults combined) and ungulate visitation frequencies. Models presented are the best performing GLMMs with a negative binomial distribution. The final model selected on which interpretations were based is highlighted in bold. M = model.

|     |          | Intercept         | Month (ref: May) |      |        | Fallow deer | Roe deer | Red deer | Moose  | Wild boar | Mean height field layer | Coefficient of variance of height field layer | Temperature | $\Delta$ AIC |
|-----|----------|-------------------|------------------|------|--------|-------------|----------|----------|--------|-----------|-------------------------|-----------------------------------------------|-------------|--------------|
|     |          |                   | June             | July | August |             |          |          |        |           |                         |                                               |             |              |
| M1  | Estimate | <b>2.204</b>      | -                | -    | -      | -           | -        | -        | -      | -         | -                       | -                                             | -           | <b>0.00</b>  |
|     | 95% CI   | <b>Low. 1.861</b> | -                | -    | -      | -           | -        | -        | -      | -         | -                       | -                                             | -           |              |
|     |          | <b>Upp. 2.547</b> | -                | -    | -      | -           | -        | -        | -      | -         | -                       | -                                             | -           |              |
| M2  | Estimate | 2.198             | -                | -    | -      | -           | 0.131    | -        | -      | -         | -                       | -                                             | -           | 0.59         |
|     | 95% CI   | Low. 1.859        | -                | -    | -      | -           | -0.076   | -        | -      | -         | -                       | -                                             | -           |              |
|     |          | Upp. 2.537        | -                | -    | -      | -           | 0.337    | -        | -      | -         | -                       | -                                             | -           |              |
| M3  | Estimate | 2.210             | -                | -    | -      | -           | -        | -        | -      | -         | -0.131                  | -                                             | -           | 0.82         |
|     | 95% CI   | Low. 1.876        | -                | -    | -      | -           | -        | -        | -      | -         | -0.357                  | -                                             | -           |              |
|     |          | Upp. 2.544        | -                | -    | -      | -           | -        | -        | -      | -         | 0.094                   | -                                             | -           |              |
| M4  | Estimate | 2.200             | -                | -    | -      | -           | -        | -        | -      | -         | -                       | -0.106                                        | -           | 1.25         |
|     | 95% CI   | Low. 1.857        | -                | -    | -      | -           | -        | -        | -      | -         | -                       | -0.310                                        | -           |              |
|     |          | Upp. 2.541        | -                | -    | -      | -           | -        | -        | -      | -         | -                       | 0.097                                         | -           |              |
| M5  | Estimate | 2.204             | -                | -    | -      | -           | 0.133    | -        | -      | -         | -0.134                  | -                                             | -           | 1.40         |
|     | 95% CI   | Low. 1.874        | -                | -    | -      | -           | -0.073   | -        | -      | -         | -0.358                  | -                                             | -           |              |
|     |          | Upp. 2.535        | -                | -    | -      | -           | 0.339    | -        | -      | -         | 0.091                   | -                                             | -           |              |
| M6  | Estimate | 2.196             | -                | -    | -      | -           | -        | -        | -      | -0.085    | -                       | -                                             | -           | 1.52         |
|     | 95% CI   | Low. 1.849        | -                | -    | -      | -           | -        | -        | -      | -0.299    | -                       | -                                             | -           |              |
|     |          | Upp. 2.542        | -                | -    | -      | -           | -        | -        | -      | 0.129     | -                       | -                                             | -           |              |
| M7  | Estimate | 2.190             | -                | -    | -      | -           | 0.145    | -        | -      | -         | -                       | -0.122                                        | -           | 1.60         |
|     | 95% CI   | Low. 1.851        | -                | -    | -      | -           | -0.063   | -        | -      | -         | -                       | -0.325                                        | -           |              |
|     |          | Upp. 2.528        | -                | -    | -      | -           | 0.352    | -        | -      | -         | -                       | 0.081                                         | -           |              |
| M8  | Estimate | 2.186             | -                | -    | -      | -           | 0.154    | -        | -      | -         | -0.119                  | -                                             | -           | 1.62         |
|     | 95% CI   | Low. 1.844        | -                | -    | -      | -           | -0.057   | -        | -      | -         | -0.342                  | -                                             | -           |              |
|     |          | Upp. 2.528        | -                | -    | -      | -           | 0.366    | -        | -      | -         | 0.104                   | -                                             | -           |              |
| M9  | Estimate | 2.202             | -                | -    | -      | -           | -        | -        | 0.049  | -         | -                       | -                                             | -           | 1.91         |
|     | 95% CI   | Low. 1.859        | -                | -    | -      | -           | -        | -        | -0.146 | -         | -                       | -                                             | -           |              |
|     |          | Upp. 2.546        | -                | -    | -      | -           | -        | -        | 0.245  | -         | -                       | -                                             | -           |              |
| M10 | Estimate | 2.120             | -                | -    | -      | 0.043       | -        | -        | -      | -         | -                       | -                                             | -           | 2.01         |
|     | 95% CI   | Low. 1.847        | -                | -    | -      | -0.189      | -        | -        | -      | -         | -                       | -                                             | -           |              |
|     |          | Upp. 2.546        | -                | -    | -      | 0.275       | -        | -        | -      | -         | -                       | -                                             | -           |              |
| M11 | Estimate | 2.207             | -                | -    | -      | -           | -        | 0.032    | -      | -         | -                       | -                                             | -           | 2.05         |
|     | 95% CI   | Low. 1.865        | -                | -    | -      | -           | -        | -0.168   | -      | -         | -                       | -                                             | -           |              |
|     |          | Upp. 2.548        | -                | -    | -      | -           | -        | 0.231    | -      | -         | -                       | -                                             | -           |              |

Table B.8A. [Continued]

|     |             | Intercept | Month (ref: May) |      |        | Fallow deer | Roe deer | Red deer | Moose  | Wild boar | Mean height field layer | Coefficient of variance of height field layer | Temperature | $\Delta$ AIC |
|-----|-------------|-----------|------------------|------|--------|-------------|----------|----------|--------|-----------|-------------------------|-----------------------------------------------|-------------|--------------|
|     |             |           | June             | July | August |             |          |          |        |           |                         |                                               |             |              |
| M12 | Estimate    | 2.205     | -                | -    | -      | -           | -        | -        | -      | -0.033    | -                       | -                                             | 2.06        |              |
|     | 95% CI Low. | 1.863     | -                | -    | -      | -           | -        | -        | -      | -0.246    | -                       | -                                             |             |              |
|     | Upp.        | 2.547     | -                | -    | -      | -           | -        | -        | -      | 0.181     | -                       | -                                             |             |              |
| M13 | Estimate    | 2.205     | -                | -    | -      | -           | -        | -        | -      | -         | -0.118                  | -0.092                                        | 2.36        |              |
|     | 95% CI Low. | 1.870     | -                | -    | -      | -           | -        | -        | -      | -         | -0.344                  | -0.296                                        |             |              |
|     | Upp.        | 2.539     | -                | -    | -      | -           | -        | -        | -      | -         | 0.108                   | 0.111                                         |             |              |
| M14 | Estimate    | 2.202     | -                | -    | -      | -           | -        | -        | -      | -0.083    | -0.132                  | -                                             | 2.39        |              |
|     | 95% CI Low. | 1.865     | -                | -    | -      | -           | -        | -        | -      | -0.294    | -0.359                  | -                                             |             |              |
|     | Upp.        | 2.539     | -                | -    | -      | -           | -        | -        | -      | 0.127     | 0.094                   | -                                             |             |              |
| M15 | Estimate    | 2.192     | -                | -    | -      | -           | 0.157    | -        | -      | -         | -0.118                  | -0.135                                        | -           | 2.46         |
|     | 95% CI Low. | 1.860     | -                | -    | -      | -           | -0.054   | -        | -      | -         | -0.338                  | -0.364                                        | -           |              |
|     | Upp.        | 2.525     | -                | -    | -      | -           | 0.368    | -        | -      | -         | 0.103                   | 0.091                                         | -           |              |
| M16 | Estimate    | 2.191     | -                | -    | -      | 0.044       | 0.131    | -        | -      | -         | -                       | -                                             | -           | 2.63         |
|     | 95% CI Low. | 1.845     | -                | -    | -      | -0.186      | -0.075   | -        | -      | -         | -                       | -                                             | -           |              |
|     | Upp.        | 2.536     | -                | -    | -      | 0.723       | 0.337    | -        | -      | -         | -                       | -                                             | -           |              |
| M17 | Estimate    | 2.197     | -                | -    | -      | -           | 0.126    | -        | 0.035  | -         | -                       | -                                             | -           | 2.65         |
|     | 95% CI Low. | 1.858     | -                | -    | -      | -           | -0.081   | -        | -0.163 | -         | -                       | -                                             | -           |              |
|     | Upp.        | 2.537     | -                | -    | -      | -           | 0.334    | -        | 0.233  | -         | -                       | -                                             | -           |              |
| M18 | Estimate    | 2.201     | -                | -    | -      | -           | 0.131    | 0.033    | -      | -         | -                       | -                                             | -           | 2.66         |
|     | 95% CI Low. | 1.863     | -                | -    | -      | -           | -0.075   | -0.162   | -      | -         | -                       | -                                             | -           |              |
|     | Upp.        | 2.538     | -                | -    | -      | -           | 0.337    | 0.228    | -      | -         | -                       | -                                             | -           |              |
| M19 | Estimate    | 2.208     | -                | -    | -      | -           | -        | -        | -      | -0.069    | -                       | -0.134                                        | -0.095      | 2.67         |
|     | 95% CI Low. | 1.877     | -                | -    | -      | -           | -        | -        | -      | -0.286    | -                       | -0.363                                        | -0.298      |              |
|     | Upp.        | 2.538     | -                | -    | -      | -           | -        | -        | -      | 0.147     | -                       | 0.095                                         | 0.108       |              |
| M20 | Estimate    | 2.191     | -                | -    | -      | -           | 0.144    | -        | -      | -0.036    | -                       | -                                             | -0.124      | 2.70         |
|     | 95% CI Low. | 1.854     | -                | -    | -      | -           | -0.063   | -        | -      | -0.248    | -                       | -                                             | -0.327      |              |
|     | Upp.        | 2.528     | -                | -    | -      | -           | 0.351    | -        | -      | 0.176     | -                       | -                                             | 0.080       |              |
| M21 | Estimate    | 2.199     | -                | -    | -      | 0.064       | -        | -        | -      | -         | -                       | -0.142                                        | -           | 2.70         |
|     | 95% CI Low. | 1.858     | -                | -    | -      | -0.167      | -        | -        | -      | -         | -                       | -0.372                                        | -           |              |
|     | Upp.        | 2.541     | -                | -    | -      | 0.296       | -        | -        | -      | -         | -                       | 0.088                                         | -           |              |
| M22 | Estimate    | 2.204     | -                | -    | -      | -           | 0.133    | -        | -      | -         | -                       | -0.134                                        | -           | 2.74         |
|     | 95% CI Low. | 1.874     | -                | -    | -      | -           | -0.073   | -        | -      | -         | -                       | -0.358                                        | -           |              |
|     | Upp.        | 2.535     | -                | -    | -      | -           | 0.339    | -        | -      | -         | -                       | 0.091                                         | -           |              |
| M23 | Estimate    | 2.208     | -                | -    | -      | -           | -        | -        | 0.045  | -         | -                       | -0.130                                        | -           | 2.81         |
|     | 95% CI Low. | 1.873     | -                | -    | -      | -           | -        | -        | -0.149 | -         | -                       | -0.355                                        | -           |              |
|     | Upp.        | 2.543     | -                | -    | -      | -           | -        | -        | 0.239  | -         | -                       | 0.095                                         | -           |              |

Table B.8A. [Continued]

|     |            | Intercept  | Month (ref: May) |      |        | Fallow deer | Roe deer | Red deer | Moose  | Wild boar | Mean height<br>field layer | Coefficient of variance<br>of height field layer | Temperature | $\Delta$ AIC |
|-----|------------|------------|------------------|------|--------|-------------|----------|----------|--------|-----------|----------------------------|--------------------------------------------------|-------------|--------------|
|     |            |            | June             | July | August |             |          |          |        |           |                            |                                                  |             |              |
| M24 | Estimate   | 2.212      | -                | -    | -      | -           | 0.018    | -        | -      | -         | -0.129                     | -                                                | 2.98        |              |
|     | 95% CI     | Low. 1.878 | -                | -    | -      | -           | -0.183   | -        | -      | -         | -0.356                     | -                                                |             |              |
|     | Upp. 2.545 | -          | -                | -    | -      | -           | 0.218    | -        | -      | -         | 0.098                      | -                                                |             |              |
| M25 | Estimate   | 2.194      | -                | -    | -      | -           | -        | -        | -      | -0.060    | -                          | -0.091                                           | 3.15        |              |
|     | 95% CI     | Low. 1.850 | -                | -    | -      | -           | -        | -        | -      | -0.278    | -                          | -0.300                                           |             |              |
|     | Upp. 2.538 | -          | -                | -    | -      | -           | -        | -        | -      | 0.157     | -                          | 0.118                                            |             |              |
| M26 | Estimate   | 2.181      | -                | -    | -      | -           | 0.161    | -        | -      | -0.092    | -                          | -0.100                                           | 3.19        |              |
|     | 95% CI     | Low. 1.840 | -                | -    | -      | -           | -0.051   | -        | -      | -0.317    | -                          | -0.308                                           |             |              |
|     | Upp. 2.522 | -          | -                | -    | -      | -           | 0.272    | -        | -      | 0.134     | -                          | 0.107                                            |             |              |
| M27 | Estimate   | 2.198      | -                | -    | -      | -           | -        | 0.045    | -      | -         | -                          | -0.105                                           | 3.23        |              |
|     | 95% CI     | Low. 1.855 | -                | -    | -      | -           | -        | -0.151   | -      | -         | -                          | -0.309                                           |             |              |
|     | Upp. 2.540 | -          | -                | -    | -      | -           | -        | 0.241    | -      | -         | -                          | 0.099                                            |             |              |
| M28 | Estimate   | 2.192      | -                | -    | -      | 0.071       | 0.136    | -        | -      | -         | -0.149                     | -                                                | 3.24        |              |
|     | 95% CI     | Low. 1.854 | -                | -    | -      | -0.160      | -0.071   | -        | -      | -         | -0.380                     | -                                                |             |              |
|     | Upp. 2.530 | -          | -                | -    | -      | 0.302       | 0.342    | -        | -      | -         | 0.083                      | -                                                |             |              |
| M29 | Estimate   | 2.190      | -                | -    | -      | 0.050       | -        | -        | -      | -         | -                          | -0.110                                           | 3.26        |              |
|     | 95% CI     | Low. 1.841 | -                | -    | -      | -0.180      | -        | -        | -      | -         | -                          | -0.314                                           |             |              |
|     | Upp. 2.539 | -          | -                | -    | -      | 0.280       | -        | -        | -      | -         | -                          | 0.095                                            |             |              |
| M30 | Estimate   | 2.201      | -                | -    | -      | -           | -        | -        | -0.040 | -         | -                          | -0.109                                           | 3.31        |              |
|     | 95% CI     | Low. 1.861 | -                | -    | -      | -           | -        | -        | -0.255 | -         | -                          | -0.312                                           |             |              |
|     | Upp. 2.541 | -          | -                | -    | -      | -           | -        | -        | 0.175  | -         | -                          | 0.095                                            |             |              |
| M31 | Estimate   | 2.206      | -                | -    | -      | -           | 0.131    | -        | -0.060 | -         | -0.147                     | -                                                | 3.32        |              |
|     | 95% CI     | Low. 1.879 | -                | -    | -      | -           | -0.075   | -        | -0.272 | -         | -0.376                     | -                                                |             |              |
|     | Upp. 2.533 | -          | -                | -    | -      | -           | 0.337    | -        | 0.152  | -         | 0.081                      | -                                                |             |              |
| M32 | Estimate   | 2.202      | -                | -    | -      | -           | -        | 0.034    | -      | -         | -                          | -0.107                                           | 3.33        |              |
|     | 95% CI     | Low. 1.862 | -                | -    | -      | -           | -        | -0.167   | -      | -         | -                          | -0.310                                           |             |              |
|     | Upp. 2.542 | -          | -                | -    | -      | -           | -        | 0.235    | -      | -         | -                          | 0.096                                            |             |              |
| M33 | Estimate   | 2.195      | -                | -    | -      | -           | -        | 0.050    | -      | -0.085    | -                          | -                                                | 3.47        |              |
|     | 95% CI     | Low. 1.848 | -                | -    | -      | -           | -        | -0.147   | -      | -0.300    | -                          | -                                                |             |              |
|     | Upp. 2.541 | -          | -                | -    | -      | -           | -        | 0.246    | -      | 0.130     | -                          | -                                                |             |              |
| M34 | Estimate   | 2.204      | -                | -    | -      | -           | 0.129    | 0.031    | -      | -         | -0.133                     | -                                                | 3.53        |              |
|     | 95% CI     | Low. 1.873 | -                | -    | -      | -           | -0.078   | -0.165   | -      | -         | -0.357                     | -                                                |             |              |
|     | Upp. 2.534 | -          | -                | -    | -      | -           | 0.337    | 0.227    | -      | -         | 0.092                      | -                                                |             |              |
| M35 | Estimate   | 2.189      | -                | -    | -      | 0.040       | -        | -        | -      | -0.084    | -                          | -                                                | 3.59        |              |
|     | 95% CI     | Low. 1.836 | -                | -    | -      | -0.193      | -        | -        | -      | -0.297    | -                          | -                                                |             |              |
|     | Upp. 2.542 | -          | -                | -    | -      | 0.273       | -        | -        | -      | 0.130     | -                          | -                                                |             |              |

Table B.8A. [Continued]

|     |            | Intercept  | Month (ref: May) |      |        | Fallow deer | Roe deer | Red deer | Moose  | Wild boar | Mean height field layer | Coefficient of variance of height field layer | Temperature | $\Delta$ AIC |
|-----|------------|------------|------------------|------|--------|-------------|----------|----------|--------|-----------|-------------------------|-----------------------------------------------|-------------|--------------|
|     |            |            | June             | July | August |             |          |          |        |           |                         |                                               |             |              |
| M36 | Estimate   | 2.206      | -                | -    | -      | -           | 0.133    | 0.018    | -      | -         | -                       | -0.131                                        | -           | 3.59         |
|     | 95% CI     | Low. 1.876 | -                | -    | -      | -           | -0.073   | -0.179   | -      | -         | -                       | -0.358                                        | -           |              |
|     | Upp. 2.535 | -          | -                | -    | -      | 0.339       | 0.214    | -        | -      | -         | 0.095                   | -                                             |             |              |
| M37 | Estimate   | 2.197      | -                | -    | -      | -           | -        | -        | -0.034 | -0.085    | -                       | -                                             | -           | 3.61         |
|     | 95% CI     | Low. 1.852 | -                | -    | -      | -           | -        | -        | -0.249 | -0.299    | -                       | -                                             | -           |              |
|     | Upp. 2.542 | -          | -                | -    | -      | -           | -        | -        | 0.182  | 0.129     | -                       | -                                             |             |              |
| M38 | Estimate   | 2.180      | -                | -    | -      | 0.052       | -0.146   | -        | -      | -         | -                       | -                                             | -0.125      | 3.63         |
|     | 95% CI     | Low. 1.834 | -                | -    | -      | -0.175      | -0.062   | -        | -      | -         | -                       | -                                             | -0.330      |              |
|     | Upp. 2.526 | -          | -                | -    | -      | 0.279       | 0.353    | -        | -      | -         | -                       | -                                             | 0.079       |              |
| M39 | Estimate   | 2.198      | -                | -    | -      | -           | -        | 0.023    | -      | -         | -0.082                  | -                                             | -           | 3.65         |
|     | 95% CI     | Low. 1.853 | -                | -    | -      | -           | -        | -0.176   | -      | -         | -0.297                  | -                                             | -           |              |
|     | Upp. 2.543 | -          | -                | -    | -      | -           | -        | 0.223    | -      | -         | 0.133                   | -                                             | -           |              |
| M40 | Estimate   | 2.192      | -                | -    | -      | -           | 0.145    | 0.036    | -      | -         | -                       | -                                             | -0.123      | 3.70         |
|     | 95% CI     | Low. 1.856 | -                | -    | -      | -           | -0.062   | -0.160   | -      | -         | -                       | -                                             | -0.326      |              |
|     | Upp. 2.529 | -          | -                | -    | -      | -           | 0.353    | 0.232    | -      | -         | -                       | -                                             | 0.081       |              |
| M41 | Estimate   | 2.191      | -                | -    | -      | -           | 0.144    | -        | -      | -0.036    | -                       | -                                             | -0.134      | 3.72         |
|     | 95% CI     | Low. 1.854 | -                | -    | -      | -           | -0.063   | -        | -      | -0.248    | -                       | -                                             | -0.327      |              |
|     | Upp. 2.528 | -          | -                | -    | -      | -           | 0.351    | -        | -      | 0.176     | -                       | -                                             | 0.080       |              |
| M42 | Estimate   | 2.189      | -                | -    | -      | -           | 0.141    | -        | 0.028  | -         | -                       | -                                             | -0.121      | 3.74         |
|     | 95% CI     | Low. 1.850 | -                | -    | -      | -           | -0.068   | -        | -0.171 | -         | -                       | -                                             | -0.325      |              |
|     | Upp. 2.528 | -          | -                | -    | -      | -           | 0.350    | -        | 0.227  | -         | -                       | -                                             | 0.084       |              |
| M43 | Estimate   | 2.188      | -                | -    | -      | -           | 0.150    | -        | 0.033  | -         | -0.118                  | -                                             | -           | 3.75         |
|     | 95% CI     | Low. 1.843 | -                | -    | -      | -           | -0.062   | -        | -0.167 | -         | -0.342                  | -                                             | -           |              |
|     | Upp. 2.528 | -          | -                | -    | -      | -           | 0.363    | -        | 0.232  | -         | 0.105                   | -                                             | -           |              |
| M44 | Estimate   | 2.180      | -                | -    | -      | 0.036       | 0.154    | -        | -      | -         | -0.116                  | -                                             | -           | 3.75         |
|     | 95% CI     | Low. 1.832 | -                | -    | -      | -0.194      | -0.058   | -        | -      | -         | -0.340                  | -                                             | -           |              |
|     | Upp. 2.527 | -          | -                | -    | -      | 0.266       | 0.365    | -        | -      | -         | 0.107                   | -                                             | -           |              |
| M45 | Estimate   | 2.187      | -                | -    | -      | -           | 0.154    | -        | -      | -0.033    | -0.120                  | -                                             | -           | 3.76         |
|     | 95% CI     | Low. 1.846 | -                | -    | -      | -           | -0.057   | -        | -      | -0.246    | -0.344                  | -                                             | -           |              |
|     | Upp. 2.527 | -          | -                | -    | -      | -           | 0.365    | -        | -      | 0.180     | 0.103                   | -                                             | -           |              |
| M46 | Estimate   | 2.187      | -                | -    | -      | -           | 0.154    | 0.023    | -      | -         | -0.117                  | -                                             | -           | 3.80         |
|     | 95% CI     | Low. 1.846 | -                | -    | -      | -           | -0.057   | -0.171   | -      | -         | -0.341                  | -                                             | -           |              |
|     | Upp. 2.529 | -          | -                | -    | -      | -           | 0.366    | 0.217    | -      | -         | 0.108                   | -                                             | -           |              |

Table B.8A. [Continued]

|     |          | Intercept | Month (ref: May) |      |        | Fallow deer | Roe deer | Red deer | Moose  | Wild boar | Mean height field layer | Coefficient of variance of height field layer | Temperature | $\Delta$ AIC |
|-----|----------|-----------|------------------|------|--------|-------------|----------|----------|--------|-----------|-------------------------|-----------------------------------------------|-------------|--------------|
|     |          |           | June             | July | August |             |          |          |        |           |                         |                                               |             |              |
| M47 | Estimate | 2.195     | -                | -    | -      | 0.042       | -        | -        | 0.049  | -         | -                       | -                                             | -           | 3.96         |
|     | 95% CI   | Low.      | 1.845            | -    | -      | -           | -0.190   | -        | -0.147 | -         | -                       | -                                             | -           |              |
|     |          | Upp.      | 2.545            | -    | -      | -           | 0.275    | -        | 0.246  | -         | -                       | -                                             | -           |              |
| M48 | Estimate | 2.205     | -                | -    | -      | -           | -        | 0.034    | 0.051  | -         | -                       | -                                             | -           | 3.99         |
|     | 95% CI   | Low.      | 1.864            | -    | -      | -           | -        | -0.166   | -0.144 | -         | -                       | -                                             | -           |              |
|     |          | Upp.      | 2.547            | -    | -      | -           | -        | 0.233    | 0.246  | -         | -                       | -                                             | -           |              |

Table B.8B. Standardized model estimates with 95% confidence intervals for the analysis of the association between the abundance of questing *I. ricinus* ticks (larvae, nymphs and adults combined) and ungulate visitation frequencies, for the deer species summed. Models presented are the best performing GLMMs with a negative binomial distribution. The final model selected on which interpretations were based is highlighted in bold. M = model.

|    |          | Intercept    | Month (ref: May) |      |        | Deer  | Wild boar | Mean height field layer | Coefficient of variance of height field layer | Temperature | $\Delta$ AIC |
|----|----------|--------------|------------------|------|--------|-------|-----------|-------------------------|-----------------------------------------------|-------------|--------------|
|    |          |              | June             | July | August |       |           |                         |                                               |             |              |
| M1 | Estimate | <b>2.204</b> | -                | -    | -      | -     | -         | -                       | -                                             | -           | -            |
|    | 95% CI   | Low.         | <b>1.861</b>     | -    | -      | -     | -         | -                       | -                                             | -           | <b>0.00</b>  |
|    |          | Upp.         | <b>2.547</b>     | -    | -      | -     | -         | -                       | -                                             | -           | -            |
| M2 | Estimate | 2.210        | -                | -    | -      | -     | -         | -0.131                  | -                                             | -           | -            |
|    | 95% CI   | Low.         | 1.876            | -    | -      | -     | -         | -0.357                  | -                                             | -           | 0.83         |
|    |          | Upp.         | 2.544            | -    | -      | -     | -         | 0.094                   | -                                             | -           | -            |
| M3 | Estimate | 2.200        | -                | -    | -      | -     | -         | -                       | -0.106                                        | -           | -            |
|    | 95% CI   | Low.         | 1.857            | -    | -      | -     | -         | -                       | -0.310                                        | -           | 1.25         |
|    |          | Upp.         | 2.541            | -    | -      | -     | -         | -                       | 0.097                                         | -           | -            |
| M4 | Estimate | 2.193        | -                | -    | -      | 0.094 | -         | -                       | -                                             | -           | -            |
|    | 95% CI   | Low.         | 1.845            | -    | -      | -     | -0.118    | -                       | -                                             | -           | 1.36         |
|    |          | Upp.         | 2.541            | -    | -      | -     | 0.307     | -                       | -                                             | -           | -            |
| M5 | Estimate | 2.196        | -                | -    | -      | -     | -         | -0.085                  | -                                             | -           | -            |
|    | 95% CI   | Low.         | 1.849            | -    | -      | -     | -         | -0.299                  | -                                             | -           | 1.52         |
|    |          | Upp.         | 2.542            | -    | -      | -     | -         | 0.129                   | -                                             | -           | -            |
| M6 | Estimate | 2.205        | -                | -    | -      | -     | -0.033    | -                       | -                                             | -           | -            |
|    | 95% CI   | Low.         | 1.863            | -    | -      | -     | -         | -0.246                  | -                                             | -           | 2.06         |
|    |          | Upp.         | 2.547            | -    | -      | -     | -         | 0.181                   | -                                             | -           | -            |
| M7 | Estimate | 2.198        | -                | -    | -      | 0.102 | -         | -                       | -0.136                                        | -           | -            |
|    | 95% CI   | Low.         | 1.859            | -    | -      | -     | -0.115    | -                       | -0.361                                        | -           | 2.11         |
|    |          | Upp.         | 2.537            | -    | -      | -     | 0.320     | -                       | 0.089                                         | -           | -            |

Table B.8B. [Continued]

|     |          |      | Intercept | Month (ref: May) |      |        | Deer   | Wild boar | Mean height<br>field layer | Coefficient of variance<br>of height field layer | Temperature | $\Delta$ AIC |
|-----|----------|------|-----------|------------------|------|--------|--------|-----------|----------------------------|--------------------------------------------------|-------------|--------------|
|     |          |      |           | June             | July | August |        |           |                            |                                                  |             |              |
| M8  | Estimate |      | 2.205     | -                | -    | -      | -      | -         | -0.118                     | -0.092                                           | 2.36        |              |
|     | 95% CI   | Low. | 1.870     | -                | -    | -      | -      | -         | -0.344                     | -0.296                                           |             |              |
|     |          | Upp. | 2.539     | -                | -    | -      | -      | -         | 0.108                      | 0.111                                            |             |              |
| M9  | Estimate |      | 2.202     | -                | -    | -      | -      | -0.083    | -0.132                     | -                                                | 2.39        |              |
|     | 95% CI   | Low. | 1.865     | -                | -    | -      | -      | -0.294    | -0.359                     | -                                                |             |              |
|     |          | Upp. | 2.539     | -                | -    | -      | -      | 0.127     | 0.094                      | -                                                |             |              |
| M10 | Estimate |      | 2.187     | -                | -    | -      | 0.102  | -         | -                          | -0.115                                           | 2.50        |              |
|     | 95% CI   | Low. | 1.840     | -                | -    | -      | -0.109 | -         | -                          | -0.321                                           |             |              |
|     |          | Upp. | 2.533     | -                | -    | -      | 0.313  | -         | -                          | 0.091                                            |             |              |
| M11 | Estimate |      | 2.208     | -                | -    | -      | -      | -0.069    | -0.134                     | -0.095                                           | 2.67        |              |
|     | 95% CI   | Low. | 1.877     | -                | -    | -      | -      | -0.286    | -0.363                     | -0.297                                           |             |              |
|     |          | Upp. | 2.538     | -                | -    | -      | -      | 0.147     | 0.095                      | 0.108                                            |             |              |
| M12 | Estimate |      | 2.185     | -                | -    | -      | 0.096  | -         | -0.088                     | -                                                | 2.87        |              |
|     | 95% CI   | Low. | 1.833     | -                | -    | -      | -0.116 | -         | -0.302                     | -                                                |             |              |
|     |          | Upp. | 2.536     | -                | -    | -      | 0.308  | -         | 0.127                      | -                                                |             |              |
| M13 | Estimate |      | 2.194     | -                | -    | -      | -      | -         | -0.60                      | -                                                | 3.15        |              |
|     | 95% CI   | Low. | 1.850     | -                | -    | -      | -      | -         | -0.278                     | -0.300                                           |             |              |
|     |          | Upp. | 2.538     | -                | -    | -      | -      | -         | 0.157                      | 0.118                                            |             |              |
| M14 | Estimate |      | 2.201     | -                | -    | -      | -      | -0.010    | -                          | -0.109                                           | 3.31        |              |
|     | 95% CI   | Low. | 1.861     | -                | -    | -      | -      | -0.255    | -                          | -0.312                                           |             |              |
|     |          | Upp. | 2.541     | -                | -    | -      | -      | 0.175     | -                          | 0.095                                            |             |              |
| M15 | Estimate |      | 2.194     | -                | -    | -      | 0.095  | -0.036    | -                          | -                                                | 3.43        |              |
|     | 95% CI   | Low. | 1.848     | -                | -    | -      | -0.116 | -0.250    | -                          | -                                                |             |              |
|     |          | Upp. | 2.540     | -                | -    | -      | 0.307  | 0.177     | -                          | -                                                |             |              |
| M16 | Estimate |      | 2.191     | -                | -    | -      | 0.107  | -         | -0.122                     | -0.100                                           | 3.58        |              |
|     | 95% CI   | Low. | 1.852     | -                | -    | -      | -0.108 | -         | -0.347                     | -0.306                                           |             |              |
|     |          | Upp. | 2.531     | -                | -    | -      | 0.322  | -         | 0.104                      | 0.106                                            |             |              |
| M17 | Estimate |      | 2.197     | -                | -    | -      | -      | -0.034    | -0.085                     | -                                                | 3.61        |              |
|     | 95% CI   | Low. | 1.852     | -                | -    | -      | -      | -0.249    | -0.299                     | -                                                |             |              |
|     |          | Upp. | 2.542     | -                | -    | -      | -      | 0.182     | 0.129                      | -                                                |             |              |
| M18 | Estimate |      | 2.190     | -                | -    | -      | 0.104  | -         | -0.086                     | -0.137                                           | 3.68        |              |
|     | 95% CI   | Low. | 1.847     | -                | -    | -      | -0.113 | -         | -0.297                     | -0.363                                           |             |              |
|     |          | Upp. | 2.532     | -                | -    | -      | 0.320  | -         | 0.136                      | 0.089                                            |             |              |
| M19 | Estimate |      | 2.200     | -                | -    | -      | 0.105  | -0.071    | -                          | -0.153                                           | 3.92        |              |
|     | 95% CI   | Low. | 1.864     | -                | -    | -      | -0.110 | -0.286    | -                          | -0.383                                           |             |              |
|     |          | Upp. | 2.535     | -                | -    | -      | 0.320  | 0.145     | -                          | 0.076                                            |             |              |

Table B.8C. Standardized model estimates with 95% confidence intervals for the analysis of the association between the abundance of questing *I. ricinus* ticks (larvae, nymphs and adults combined) and ungulate visitation frequencies, for the ungulate species summed. Models presented are the best performing GLMMs with a negative binomial distribution. The final model selected on which interpretations were based is highlighted in bold. M = model.

|     |          | Intercept         | Month (ref: May) |      |        | Ungulates | Mean height<br>field layer | Coefficient of variance<br>of height field layer | Temperature | $\Delta AIC$ |
|-----|----------|-------------------|------------------|------|--------|-----------|----------------------------|--------------------------------------------------|-------------|--------------|
|     |          |                   | June             | July | August |           |                            |                                                  |             |              |
| M1  | Estimate | <b>2.204</b>      | -                | -    | -      | -         | -                          | -                                                | -           | <b>0.00</b>  |
|     | 95% CI   | <b>Low. 1.861</b> | -                | -    | -      | -         | -                          | -                                                | -           |              |
|     |          | <b>Upp. 2.547</b> | -                | -    | -      | -         | -                          | -                                                | -           |              |
| M2  | Estimate | 2.210             | -                | -    | -      | -         | -                          | -0.131                                           | -           | 0.82         |
|     | 95% CI   | Low. 1.876        | -                | -    | -      | -         | -                          | -0.357                                           | -           |              |
|     |          | Upp. 2.544        | -                | -    | -      | -         | -                          | 0.094                                            | -           |              |
| M3  | Estimate | 2.200             | -                | -    | -      | -         | -                          | -                                                | -0.106      | 1.25         |
|     | 95% CI   | Low. 1.857        | -                | -    | -      | -         | -                          | -                                                | -0.310      |              |
|     |          | Upp. 2.541        | -                | -    | -      | -         | -                          | -                                                | 0.097       |              |
| M4  | Estimate | 2.196             | -                | -    | -      | -         | -0.085                     | -                                                | -           | 1.52         |
|     | 95% CI   | Low. 1.849        | -                | -    | -      | -         | -0.299                     | -                                                | -           |              |
|     |          | Upp. 2.542        | -                | -    | -      | -         | 0.129                      | -                                                | -           |              |
| M5  | Estimate | 2.201             | -                | -    | -      | 0.027     | -                          | -                                                | -           | 2.08         |
|     | 95% CI   | Low. 1.856        | -                | -    | -      | -0.177    | -                          | -                                                | -           |              |
|     |          | Upp. 2.546        | -                | -    | -      | 0.231     | -                          | -                                                | -           |              |
| M6  | Estimate | 2.205             | -                | -    | -      | -         | -                          | -0.118                                           | -0.092      | 2.36         |
|     | 95% CI   | Low. 1.870        | -                | -    | -      | -         | -                          | -0.344                                           | 0.296       |              |
|     |          | Upp. 2.539        | -                | -    | -      | -         | -                          | 0.108                                            | 0.111       |              |
| M7  | Estimate | 2.202             | -                | -    | -      | -         | -0.083                     | -0.132                                           | -           | 2.39         |
|     | 95% CI   | Low. 1.865        | -                | -    | -      | -         | -0.294                     | -0.359                                           | -           |              |
|     |          | Upp. 2.539        | -                | -    | -      | -         | 0.127                      | 0.094                                            | -           |              |
| M8  | Estimate | 2.207             | -                | -    | -      | 0.028     | -                          | -0.131                                           | -           | 2.94         |
|     | 95% CI   | Low. 1.871        | -                | -    | -      | -0.179    | -                          | -0.356                                           | -           |              |
|     |          | Upp. 2.543        | -                | -    | -      | 0.234     | -                          | 0.094                                            | -           |              |
| M9  | Estimate | 2.194             | -                | -    | -      | -         | -0.060                     | -                                                | -0.091      | 3.15         |
|     | 95% CI   | Low. 1.850        | -                | -    | -      | -         | -0.278                     | -                                                | -0.300      |              |
|     |          | Upp. 2.538        | -                | -    | -      | -         | 0.157                      | -                                                | 0.118       |              |
| M10 | Estimate | 2.196             | -                | -    | -      | 0.031     | -                          | -                                                | -0.108      | 3.34         |
|     | 95% CI   | Low. 1.851        | -                | -    | -      | -0.172    | -                          | -                                                | -0.312      |              |
|     |          | Upp. 2.540        | -                | -    | -      | 0.234     | -                          | -                                                | 0.096       |              |
| M11 | Estimate | 2.193             | -                | -    | -      | 0.028     | -0.085                     | -                                                | -           | 3.63         |
|     | 95% CI   | Low. 1.844        | -                | -    | -      | -0.175    | -0.299                     | -                                                | -           |              |
|     |          | Upp. 2.542        | -                | -    | -      | 0.231     | 0.129                      | -                                                | -           |              |

Table B.9A. Standardized model estimates with 95% confidence intervals for the analysis of the association between the abundance of questing *I. ricinus* nymphs and adults, and ungulate visitation frequencies. Models presented are the best performing GLMMs with a negative binomial distribution. The final model selected on which interpretations were based is highlighted in bold. M = model.s

|     |             | Intercept    | Month (ref: May) |        |        | Fallow deer | Roe deer | Red deer | Moose  | Wild boar | Mean height field layer | Coefficient of variance of height field layer | Temperature   | $\Delta AIC$ |
|-----|-------------|--------------|------------------|--------|--------|-------------|----------|----------|--------|-----------|-------------------------|-----------------------------------------------|---------------|--------------|
|     |             |              | June             | July   | August |             |          |          |        |           |                         |                                               |               |              |
| M1  | Estimate    | 1.125        | -0.879           | -0.381 | -0.456 | -           | -        | -        | -      | -         | -                       | -0.195                                        | -0.237        | 0.00         |
|     | 95% CI Low. | 0.577        | -1.521           | -1.053 | -1.038 | -           | -        | -        | -      | -         | -                       | -0.410                                        | -0.493        |              |
|     | Upp.        | 1.673        | -0.237           | 0.291  | 0.126  | -           | -        | -        | -      | -         | -                       | 0.019                                         | 0.018         |              |
| M2  | Estimate    | 0.731        | -                | -      | -      | -           | -        | -        | -      | -         | -                       | -0.196                                        | -0.282        | 0.14         |
|     | 95% CI Low. | 0.435        | -                | -      | -      | -           | -        | -        | -      | -         | -                       | -0.414                                        | -0.492        |              |
|     | Upp.        | 1.028        | -                | -      | -      | -           | -        | -        | -      | -         | -                       | 0.022                                         | -0.071        |              |
| M3  | Estimate    | 1.406        | -1.055           | -0.793 | -0.732 | -           | -        | -        | -      | -         | -                       | -0.228                                        | -             | 0.45         |
|     | 95% CI Low. | 0.945        | -1.665           | -1.317 | -1.243 | -           | -        | -        | -      | -         | -                       | -0.442                                        | -             |              |
|     | Upp.        | 1.868        | -0.445           | -0.269 | -0.222 | -           | -        | -        | -      | -         | -                       | -0.014                                        | -             |              |
| M4  | Estimate    | 1.119        | -0.931           | -0.339 | -0.498 | -           | -        | -        | 0.131  | -         | -                       | -0.185                                        | -0.238        | 0.47         |
|     | 95% CI Low. | 0.569        | -1.567           | -1.005 | -1.074 | -           | -        | -        | -0.052 | -         | -                       | -0.401                                        | -0.494        |              |
|     | Upp.        | 1.668        | -0.294           | 0.327  | 0.079  | -           | -        | -        | 0.314  | -         | -                       | 0.032                                         | 0.018         |              |
| M5  | Estimate    | 1.224        | -1.026           | -0.461 | -0.553 | -           | -        | -        | -      | -         | 0.143                   | -0.215                                        | -0.241        | 0.59         |
|     | 95% CI Low. | 0.674        | -1.697           | -1.137 | -1.145 | -           | -        | -        | -      | -         | -0.061                  | -0.434                                        | -0.493        |              |
|     | Upp.        | 1.774        | -0.355           | 0.216  | 0.039  | -           | -        | -        | -      | -         | 0.346                   | 0.003                                         | 0.012         |              |
| M6  | Estimate    | 1.136        | -0.879           | -0.393 | -0.478 | -           | -        | -        | -      | -         | -                       | -                                             | -0.275        | 0.77         |
|     | 95% CI Low. | 0.577        | -1.523           | -1.059 | -1.054 | -           | -        | -        | -      | -         | -                       | -                                             | -0.527        |              |
|     | Upp.        | 1.696        | -0.236           | 0.273  | 0.099  | -           | -        | -        | -      | -         | -                       | -                                             | -0.022        |              |
| M7  | Estimate    | 1.124        | -0.937           | -0.338 | -0.522 | -           | -        | -        | 0.146  | -         | -                       | -                                             | -0.277        | 0.80         |
|     | 95% CI Low. | 0.563        | -1.572           | -0.997 | -1.091 | -           | -        | -        | -0.037 | -         | -                       | -                                             | -0.529        |              |
|     | Upp.        | 1.685        | -0.302           | 0.321  | 0.047  | -           | -        | -        | 0.329  | -         | -                       | -                                             | -0.026        |              |
| M8  | Estimate    | <b>0.729</b> | -                | -      | -      | -           | -        | -        | -      | -         | -                       | -                                             | <b>-0.324</b> | <b>0.82</b>  |
|     | 95% CI Low. | <b>0.411</b> | -                | -      | -      | -           | -        | -        | -      | -         | -                       | -                                             | <b>-0.534</b> |              |
|     | Upp.        | <b>1.046</b> | -                | -      | -      | -           | -        | -        | -      | -         | -                       | -                                             | <b>-0.113</b> |              |
| M9  | Estimate    | 1.398        | -1.110           | -0.746 | -0.769 | -           | -        | -        | 0.130  | -         | -                       | -0.221                                        | -             | 0.93         |
|     | 95% CI Low. | 0.933        | -1.715           | -1.268 | -1.277 | -           | -        | -        | -0.052 | -         | -                       | -0.436                                        | -             |              |
|     | Upp.        | 1.862        | -0.506           | -0.223 | -0.261 | -           | -        | -        | 0.311  | -         | -                       | -0.007                                        | -             |              |
| M10 | Estimate    | 1.212        | -1.068           | -0.412 | -0.588 | -           | -        | -        | 0.132  | -         | 0.143                   | -0.203                                        | -0.242        | 1.27         |
|     | 95% CI Low. | 0.661        | -1.729           | -1.085 | -1.173 | -           | -        | -        | -0.052 | -         | -0.062                  | -0.423                                        | -0.495        |              |
|     | Upp.        | 1.763        | -0.406           | 0.260  | -0.002 | -           | -        | -        | 0.315  | -         | 0.348                   | 0.018                                         | 0.011         |              |
| M11 | Estimate    | 1.505        | -1.198           | -0.881 | -0.831 | -           | -        | -        | -      | -         | 0.134                   | -0.246                                        | -             | 1.14         |
|     | 95% CI Low. | 1.038        | -1.840           | -1.414 | -1.354 | -           | -        | -        | -      | -         | -0.068                  | -0.465                                        | -             |              |
|     | Upp.        | 1.973        | -0.556           | -0.348 | -0.308 | -           | -        | -        | -      | -         | 0.337                   | -0.028                                        | -             |              |



Table B.9A. [Continued]

|     |          | <i>Intercept</i> | <i>Month (ref: May)</i> |             |               | <i>Fallow deer</i> | <i>Roe deer</i> | <i>Red deer</i> | <i>Moose</i> | <i>Wild boar</i> | <i>Mean height field layer</i> | <i>Coefficient of variance of height field layer</i> | <i>Temperature</i> | <i>ΔAIC</i> |
|-----|----------|------------------|-------------------------|-------------|---------------|--------------------|-----------------|-----------------|--------------|------------------|--------------------------------|------------------------------------------------------|--------------------|-------------|
|     |          |                  | <i>June</i>             | <i>July</i> | <i>August</i> |                    |                 |                 |              |                  |                                |                                                      |                    |             |
| M12 | Estimate | 0.762            | -                       | -           | -             | -                  | -0.055          | -               | -            | -                | -                              | -0.256                                               | -                  |             |
|     | 95% CI   | Low. 0.458       | -                       | -           | -             | -                  | -0.244          | -               | -            | -                | -                              | -0.477                                               | -                  |             |
|     | Upp.     | 1.066            | -                       | -           | -             | -                  | 0.134           | -               | -            | -                | -                              | -0.036                                               | -                  |             |
| M13 | Estimate | 1.393            | -1.042                  | -0.784      | -0.725        | -                  | -0.057          | -               | -            | -                | -                              | -0.228                                               | -                  |             |
|     | 95% CI   | Low. 0.929       | -1.646                  | -1.305      | -1.233        | -                  | -0.234          | -               | -            | -                | -                              | -0.441                                               | -                  |             |
|     | Upp.     | 1.857            | -0.438                  | -0.263      | -0.216        | -                  | 0.120           | -               | -            | -                | -                              | -0.015                                               | -                  |             |
| M14 | Estimate | 0.763            | -                       | -           | -             | -                  | -               | 0.087           | -            | -                | -                              | -0.252                                               | -                  |             |
|     | 95% CI   | Low. 0.462       | -                       | -           | -             | -                  | -               | -0.087          | -            | -                | -                              | -0.475                                               | -                  |             |
|     | Upp.     | 1.063            | -                       | -           | -             | -                  | -               | 0.260           | -            | -                | -                              | -0.030                                               | -                  |             |
| M15 | Estimate | 0.768            | -                       | -           | -             | -                  | -0.053          | -               | -            | -                | -                              | -                                                    | -                  |             |
|     | 95% CI   | Low. 0.434       | -                       | -           | -             | -                  | -0.241          | -               | -            | -                | -                              | -                                                    | -                  |             |
|     | Upp.     | 1.102            | -                       | -           | -             | -                  | 0.134           | -               | -            | -                | -                              | -                                                    | -                  |             |
| M16 | Estimate | 1.149            | -1.244                  | -0.830      | -0.861        | -                  | -               | 0.129           | -            | 0.134            | -                              | -0.237                                               | -                  |             |
|     | 95% CI   | Low. 1.022       | -1.877                  | -1.363      | -1.380        | -                  | -               | -0.053          | -            | -0.070           | -                              | -0.456                                               | -                  |             |
|     | Upp.     | 1.963            | -0.611                  | -0.296      | -0.341        | -                  | -               | 0.311           | -            | 0.338            | -                              | -0.018                                               | -                  |             |
| M17 | Estimate | 0.772            | -                       | -           | -             | -                  | -               | 0.042           | -            | -                | -                              | -0.253                                               | -                  |             |
|     | 95% CI   | Low. 0.476       | -                       | -           | -             | -                  | -               | -0.135          | -            | -                | -                              | -0.475                                               | -                  |             |
|     | Upp.     | 1.068            | -                       | -           | -             | -                  | -               | 0.218           | -            | -                | -                              | -0.030                                               | -                  |             |
| M18 | Estimate | 1.554            | -1.220                  | -0.951      | -0.887        | -                  | -               | -               | -            | 0.108            | -                              | -                                                    | -                  |             |
|     | 95% CI   | Low. 1.057       | -1.880                  | -1.491      | -1.419        | -                  | -               | -               | -            | -0.094           | -                              | -                                                    | -                  |             |
|     | Upp.     | 2.051            | -0.560                  | -0.411      | -0.355        | -                  | -               | -               | -            | 0.311            | -                              | -                                                    | -                  |             |
| M19 | Estimate | 1.542            | -1.281                  | -0.893      | -0.925        | -                  | -               | 0.143           | -            | 0.113            | -                              | -                                                    | -                  |             |
|     | 95% CI   | Low. 1.046       | -1.929                  | -1.432      | -1.450        | -                  | -               | -0.039          | -            | -0.091           | -                              | -                                                    | -                  |             |
|     | Upp.     | 2.039            | -0.632                  | -0.355      | -0.399        | -                  | -               | 0.324           | -            | 0.316            | -                              | -                                                    | -                  |             |
| M20 | Estimate | 1.426            | -1.077                  | -0.811      | -0.753        | -0.043             | -               | -               | -            | -                | -                              | -0.224                                               | -                  |             |
|     | 95% CI   | Low. 0.960       | -1.695                  | -1.341      | -1.274        | -0.238             | -               | -               | -            | -                | -                              | -0.438                                               | -                  |             |
|     | Upp.     | 1.892            | -0.459                  | -0.281      | -0.232        | 0.153              | -               | -               | -            | -                | -                              | -0.010                                               | -                  |             |
| M21 | Estimate | 1.382            | -1.094                  | -0.733      | -0.762        | -                  | -0.067          | -               | 0.133        | -                | -                              | -0.222                                               | -                  |             |
|     | 95% CI   | Low. 0.915       | -1.691                  | -1.253      | -1.267        | -                  | -0.243          | -               | -0.046       | -                | -                              | -0.436                                               | -                  |             |
|     | Upp.     | 1.849            | -0.498                  | -0.212      | -0.257        | -                  | 0.109           | -               | 0.312        | -                | -                              | -0.009                                               | -                  |             |
| M22 | Estimate | 1.443            | -1.322                  | -0.806      | -0.836        | -                  | -0.063          | -               | 0.141        | -                | -                              | -                                                    | -                  |             |
|     | 95% CI   | Low. 0.956       | -1.734                  | -1.329      | -1.344        | -                  | -0.238          | -               | -0.038       | -                | -                              | -                                                    | -                  |             |
|     | Upp.     | 1.929            | -0.530                  | -0.284      | -0.327        | -                  | 0.112           | -               | 0.320        | -                | -                              | -                                                    | -                  |             |
| M23 | Estimate | 1.495            | -1.191                  | -0.875      | -0.824        | -                  | -0.066          | -               | -            | 0.138            | -                              | -0.245                                               | -                  |             |
|     | 95% CI   | Low. 1.025       | -1.827                  | -1.405      | -1.345        | -                  | -0.244          | -               | -            | -0.062           | -                              | -0.463                                               | -                  |             |
|     | Upp.     | 1.964            | -0.555                  | -0.344      | -0.304        | -                  | 0.112           | -               | -            | 0.339            | -                              | -0.027                                               | -                  |             |

Table B.9A. [Continued]

|     |             | Intercept | Month (ref: May) |        |        | Fallow deer | Roe deer | Red deer | Moose  | Wild boar | Mean height field layer | Coefficient of variance of height field layer | Temperature | $\Delta$ AIC |
|-----|-------------|-----------|------------------|--------|--------|-------------|----------|----------|--------|-----------|-------------------------|-----------------------------------------------|-------------|--------------|
|     |             |           | June             | July   | August |             |          |          |        |           |                         |                                               |             |              |
| M24 | Estimate    | 1.136     | -0.879           | -0.393 | -0.478 | -           | -        | -        | -      | -         | -                       | -0.275                                        | 2.10        |              |
|     | 95% CI Low. | 0.577     | -1.523           | -1.059 | -1.054 | -           | -        | -        | -      | -         | -                       | -0.527                                        |             |              |
|     | Upp.        | 1.696     | -0.236           | 0.273  | 0.099  | -           | -        | -        | -      | -         | -                       | -0.022                                        |             |              |
| M25 | Estimate    | 0.722     | -                | -      | -      | -           | -        | 0.079    | -      | -         | -                       | -0.320                                        | 2.13        |              |
|     | 95% CI Low. | 0.403     | -                | -      | -      | -           | -        | -0.093   | -      | -         | -                       | -0.532                                        |             |              |
|     | Upp.        | 1.042     | -                | -      | -      | -           | -        | 0.252    | -      | -         | -                       | -0.108                                        |             |              |
| M26 | Estimate    | 0.737     | -                | -      | -      | -0.041      | -        | -        | -      | -         | -0.190                  | -0.288                                        | 2.18        |              |
|     | 95% CI Low. | 0.446     | -                | -      | -      | -0.242      | -        | -        | -      | -         | -0.410                  | -0.501                                        |             |              |
|     | Upp.        | 1.029     | -                | -      | -      | 0.160       | -        | -        | -      | -         | 0.029                   | -0.076                                        |             |              |
| M27 | Estimate    | 0.736     | -                | -      | -      | -           | -        | -        | -      | 0.032     | -0.202                  | -0.285                                        | 2.21        |              |
|     | 95% CI Low. | 0.443     | -                | -      | -      | -           | -        | -        | -      | -0.168    | -0.424                  | -0.496                                        |             |              |
|     | Upp.        | 1.029     | -                | -      | -      | -           | -        | -        | -      | 0.232     | 0.019                   | -0.074                                        |             |              |
| M28 | Estimate    | 1.152     | -0.912           | -0.389 | -0.499 | -0.096      | -        | -        | -      | -         | -                       | -0.293                                        | 2.24        |              |
|     | 95% CI Low. | 0.601     | -1.560           | -1.057 | -1.082 | -0.291      | -        | -        | -      | -         | -                       | -0.546                                        |             |              |
|     | Upp.        | 1.704     | -0.264           | 0.278  | 0.084  | 0.099       | -        | -        | -      | -         | -                       | -0.039                                        |             |              |
| M29 | Estimate    | 0.731     | -                | -      | -      | -           | -        | 0.076    | -      | -         | -                       | -0.329                                        | 2.26        |              |
|     | 95% CI Low. | 0.420     | -                | -      | -      | -           | -        | -0.095   | -      | -         | -                       | -0.541                                        |             |              |
|     | Upp.        | 1.043     | -                | -      | -      | -           | -        | 0.248    | -      | -         | -                       | -0.118                                        |             |              |
| M30 | Estimate    | 0.730     | -                | -      | -      | -           | -        | -        | 0.021  | -         | -0.193                  | -0.280                                        | 2.32        |              |
|     | 95% CI Low. | 0.432     | -                | -      | -      | -           | -        | -        | -0.180 | -         | -0.413                  | -0.491                                        |             |              |
|     | Upp.        | 1.028     | -                | -      | -      | -           | -        | -        | 0.222  | -         | 0.028                   | -0.070                                        |             |              |
| M31 | Estimate    | 1.124     | -0.878           | -0.382 | -0.454 | -           | -        | -        | 0.006  | -         | -0.194                  | -0.237                                        | 2.34        |              |
|     | 95% CI Low. | 0.575     | -1.520           | -1.053 | -1.040 | -           | -        | -        | -0.203 | -         | -0.411                  | -0.493                                        |             |              |
|     | Upp.        | 1.673     | -0.235           | 0.290  | 0.132  | -           | -        | -        | 0.215  | -         | 0.022                   | 0.020                                         |             |              |
| M32 | Estimate    | 1.406     | -1.055           | -0.793 | -0.732 | -           | -        | -        | -      | -         | -0.228                  | -                                             | 2.36        |              |
|     | 95% CI Low. | 0.945     | -1.665           | -1.317 | -1.243 | -           | -        | -        | -      | -         | -0.442                  | -                                             |             |              |
|     | Upp.        | 1.868     | -0.445           | -0.269 | -0.222 | -           | -        | -        | -      | -         | -0.014                  | -                                             |             |              |
| M33 | Estimate    | 1.212     | -1.068           | -0.412 | -0.588 | -           | -        | 0.132    | -      | 0.143     | -0.203                  | -0.242                                        | 2.38        |              |
|     | 95% CI Low. | 0.661     | -1.729           | -1.085 | -1.173 | -           | -        | -0.052   | -      | -0.062    | -0.423                  | -0.495                                        |             |              |
|     | Upp.        | 1.763     | -0.406           | 0.260  | -0.002 | -           | -        | 0.315    | -      | 0.348     | 0.018                   | 0.011                                         |             |              |
| M34 | Estimate    | 1.144     | -0.970           | -0.342 | -0.546 | -0.092      | -        | 0.142    | -      | -         | -                       | -0.293                                        | 2.41        |              |
|     | 95% CI Low. | 0.589     | -1.611           | -1.002 | -1.123 | -0.288      | -        | -0.040   | -      | -         | -                       | -0.546                                        |             |              |
|     | Upp.        | 1.698     | -0.330           | 0.319  | 0.031  | 0.104       | -        | 0.324    | -      | -         | -                       | -0.040                                        |             |              |
| M35 | Estimate    | 1.134     | -0.956           | -0.344 | -0.515 | 0.066       | -        | 0.128    | -      | -         | -0.174                  | -0.251                                        | 4.48        |              |
|     | 95% CI Low. | 0.588     | -1.599           | -1.012 | -1.098 | -0.263      | -        | -0.055   | -      | -         | -0.392                  | -0.509                                        |             |              |
|     | Upp.        | 1.681     | -0.313           | 0.324  | 0.068  | 0.130       | -        | 0.310    | -      | -         | 0.045                   | 0.008                                         |             |              |



Table B.9A. [Continued]

|     |            | Intercept  | Month (ref: May) |        |        | Fallow deer | Roe deer | Red deer | Moose  | Wild boar | Mean height<br>field layer | Coefficient of variance<br>of height field layer | Temperature | $\Delta$ AIC |
|-----|------------|------------|------------------|--------|--------|-------------|----------|----------|--------|-----------|----------------------------|--------------------------------------------------|-------------|--------------|
|     |            |            | June             | July   | August |             |          |          |        |           |                            |                                                  |             |              |
| M48 | Estimate   | 0.725      | -                | -      | -      | -           | -        | -        | 0.048  | -         | -                          | -0.318                                           | 2.79        |              |
|     | 95% CI     | Low. 0.404 | -                | -      | -      | -           | -        | -        | -0.154 | -         | -                          | -0.529                                           |             |              |
|     | Upp. 1.047 | -          | -                | -      | -      | -           | -        | -        | 0.250  | -         | -                          | -0.107                                           |             |              |
| M49 | Estimate   | 1.115      | -0.931           | -0.342 | -0.508 | -           | -        | 0.153    | 0.059  | -         | -                          | -0.270                                           | 2.81        |              |
|     | 95% CI     | Low. 0.552 | -1.560           | -0.999 | -0.074 | -           | -        | -0.030   | -0.151 | -         | -                          | -0.521                                           |             |              |
|     | Upp. 1.678 | -0.301     | 0.315            | 0.059  | -      | -           | -        | 0.335    | 0.270  | -         | -                          | -0.018                                           |             |              |
| M50 | Estimate   | 0.705      | -                | -      | -      | -           | -0.111   | -        | 0.085  | -         | -                          | -0.341                                           | 2.87        |              |
|     | 95% CI     | Low. 0.377 | -                | -      | -      | -           | -0.291   | -        | -0.084 | -         | -                          | -0.554                                           |             |              |
|     | Upp. 1.032 | -          | -                | -      | -      | 0.069       | -        | 0.254    | -      | -         | -                          | -0.128                                           |             |              |
| M51 | Estimate   | 1.123      | -0.928           | -0.343 | -0.512 | -           | -        | 0.041    | 0.142  | -         | -                          | -0.280                                           | 2.88        |              |
|     | 95% CI     | Low. 0.562 | -1.567           | -1.006 | -1.088 | -           | -        | -0.122   | -0.041 | -         | -                          | -0.533                                           |             |              |
|     | Upp. 1.683 | -0.288     | 0.320            | 0.065  | -      | -           | 0.203    | 0.325    | -      | -         | -                          | -0.028                                           |             |              |
| M52 | Estimate   | 1.456      | -1.150           | -0.817 | -0.839 | -           | -        | -        | 0.140  | -         | -                          | -                                                | 2.90        |              |
|     | 95% CI     | Low. 0.971 | -1.759           | -1.341 | -1.350 | -           | -        | -        | -0.041 | -         | -                          | -                                                |             |              |
|     | Upp. 1.941 | -0.542     | -0.293           | -0.328 | -      | -           | -        | 0.321    | -      | -         | -                          | -                                                |             |              |
| M53 | Estimate   | 1.164      | -1.028           | -0.350 | -0.573 | -           | -0.105   | -        | 0.153  | -         | 0.130                      | -0.302                                           | 2.92        |              |
|     | 95% CI     | Low. 0.588 | -1.694           | -1.026 | -1.157 | -           | -0.281   | -        | -0.026 | -         | -0.072                     | -0.554                                           |             |              |
|     | Upp. 1.740 | -0.362     | 0.325            | 0.011  | -      | 0.071       | -        | 0.332    | -      | 0.332     | -                          | -0.050                                           |             |              |
| M54 | Estimate   | 1.131      | -0.873           | -0.396 | -0.468 | -           | -        | -        | 0.034  | -         | -                          | -0.269                                           | 2.95        |              |
|     | 95% CI     | Low. 0.570 | -1.515           | -1.062 | -1.045 | -           | -        | -        | -      | -0.176    | -                          | -0.523                                           |             |              |
|     | Upp. 1.692 | -0.231     | 0.269            | 0.110  | -      | -           | -        | -        | 0.244  | -         | -                          | -0.015                                           |             |              |
| M55 | Estimate   | 1.495      | -1.191           | -0.875 | -0.824 | -           | -0.066   | -        | -      | -         | 0.138                      | -0.245                                           | 2.97        |              |
|     | 95% CI     | Low. 1.025 | -1.827           | -1.405 | -1.345 | -           | -0.244   | -        | -      | -         | -0.062                     | -0.463                                           |             |              |
|     | Upp. 1.964 | -0.555     | -0.344           | -0.304 | -      | 0.112       | -        | -        | -      | 0.339     | -0.027                     | -                                                |             |              |
| M56 | Estimate   | 1.228      | -1.031           | -0.461 | -0.560 | -           | -        | -        | -0.014 | 0.144     | -0.218                     | -0.242                                           | 2.98        |              |
|     | 95% CI     | Low. 0.676 | -1.706           | -1.137 | -1.162 | -           | -        | -        | -      | -0.061    | -0.439                     | -0.495                                           |             |              |
|     | Upp. 1.780 | -0.356     | 0.215            | 0.042  | -      | -           | -        | -        | 0.193  | 0.350     | 0.003                      | 0.011                                            |             |              |
| M57 | Estimate   | 0.729      | -                | -      | -      | -           | -        | -        | -      | 0.001     | -                          | -0.324                                           | 2.99        |              |
|     | 95% CI     | Low. 0.410 | -                | -      | -      | -           | -        | -        | -      | -0.196    | -                          | -0.536                                           |             |              |
|     | Upp. 1.048 | -          | -                | -      | -      | -           | -        | -        | -      | 0.199     | -                          | 0.112                                            |             |              |
| M58 | Estimate   | 1.180      | -0.980           | -0.415 | -0.530 | -           | -0.097   | -        | -      | 0.122     | -                          | -0.297                                           | 3.08        |              |
|     | 95% CI     | Low. 0.602 | -1.660           | -1.097 | -1.124 | -           | -0.274   | -        | -      | -0.079    | -                          | -0.551                                           |             |              |
|     | Upp. 1.759 | -0.300     | 0.267            | 0.065  | -      | 0.080       | -        | -        | -      | 0.323     | -                          | -0.044                                           |             |              |
| M59 | Estimate   | 1.387      | -1.104           | -0.743 | -0.752 | -           | -        | -        | 0.135  | 0.045     | -0.214                     | -                                                | 3.12        |              |
|     | 95% CI     | Low. 0.918 | -1.706           | -1.264 | -1.264 | -           | -        | -        | -0.047 | -0.171    | -0.431                     | -                                                |             |              |
|     | Upp. 1.856 | -0.502     | -0.222           | -0.239 | -      | -           | -        | 0.317    | 0.260  | -         | 0.004                      | -                                                |             |              |

Table B.9A. [Continued]

|     |          | Intercept | Month (ref: May) |        |        | Fallow deer | Roe deer | Red deer | Moose  | Wild boar | Mean height<br>field layer | Coefficient of variance<br>of height field layer | Temperature | $\Delta$ AIC |
|-----|----------|-----------|------------------|--------|--------|-------------|----------|----------|--------|-----------|----------------------------|--------------------------------------------------|-------------|--------------|
|     |          |           | June             | July   | August |             |          |          |        |           |                            |                                                  |             |              |
| M60 | Estimate | 0.722     | -                | -      | -      | -           | -0.090   | 0.060    | -      | -         | -                          | -0.186                                           | -0.304      | 3.13         |
|     | 95% CI   | Low.      | 0.425            | -      | -      | -           | -        | -0.273   | -0.117 | -         | -                          | -0.404                                           | -0.517      |              |
|     | Upp.     | 1.021     | -                | -      | -      | -           | 0.092    | 0.237    | -      | -         | -                          | 0.033                                            | -0.092      |              |
| M61 | Estimate | 1.416     | -1.130           | -0.764 | -0.788 | -0.038      | -        | -        | 0.128  | -         | -                          | -0.217                                           | -           | 3.15         |
|     | 95% CI   | Low.      | 0.946            | -1.744 | -1.295 | -1.308      | -0.235   | -        | -0.054 | -         | -                          | -0.432                                           | -           |              |
|     | Upp.     | 1.887     | -0.516           | -0.233 | -0.269 | 0.160       | -        | -        | 0.309  | -         | -                          | -0.002                                           | -           |              |
| M62 | Estimate | 1.212     | -1.063           | -0.416 | -0.577 | -           | -        | 0.051    | 0.129  | -         | 0.151                      | -0.203                                           | -0.250      | 3.18         |
|     | 95% CI   | Low.      | 0.759            | -1.727 | -1.091 | -1.168      | -        | -        | -0.115 | -0.055    | -                          | -0.424                                           | -0.504      |              |
|     | Upp.     | 0.663     | -0.399           | 0.259  | 0.014  | -           | -        | 0.217    | 0.312  | -         | 0.358                      | 0.018                                            | 0.005       |              |
| M63 | Estimate | 1.401     | -1.109           | -0.754 | -0.768 | -           | -        | 0.026    | 0.129  | -         | -                          | -0.220                                           | -           | 3.19         |
|     | 95% CI   | Low.      | 0.937            | -1.715 | -1.281 | -1.279      | -        | -        | -0.137 | -0.052    | -                          | -0.435                                           | -           |              |
|     | Upp.     | 1.865     | -0.503           | -0.227 | -0.257 | -           | -        | 0.190    | 0.310  | -         | -                          | -0.005                                           | -           |              |
| M64 | Estimate | 0.122     | -1.081           | -0.413 | -0.599 | -0.059      | -        | -        | 0.128  | -         | 0.139                      | -0.191                                           | -0.254      | 3.25         |
|     | 95% CI   | Low.      | 0.673            | -1.744 | -1.086 | -1.189      | -0.255   | -        | -      | -0.055    | -                          | -0.413                                           | -0.509      |              |
|     | Upp.     | 1.769     | -0.418           | 0.260  | -0.010 | 0.137       | -        | -        | 0.312  | -         | 0.344                      | 0.032                                            | 0.002       |              |
| M65 | Estimate | 1.511     | -1.198           | -0.892 | -0.829 | -           | -        | 0.037    | -      | -         | 0.138                      | -0.245                                           | -           | 3.30         |
|     | 95% CI   | Low.      | 1.044            | -1.841 | -1.430 | -1.355      | -        | -        | -0.129 | -         | -                          | -0.464                                           | -           |              |
|     | Upp.     | 1.977     | -0.555           | 0.354  | -0.303 | -           | -        | 0.203    | -      | -         | 0.341                      | -0.025                                           | -           |              |
| M66 | Estimate | 0.717     | -                | -      | -      | -           | -0.098   | 0.068    | -      | -         | -                          | -                                                | -0.347      | 3.33         |
|     | 95% CI   | Low.      | 0.398            | -      | -      | -           | -        | -0.279   | -0.106 | -         | -                          | -                                                | -0.559      |              |
|     | Upp.     | 1.036     | -                | -      | -      | -           | 0.082    | 0.242    | -      | -         | -                          | -                                                | -0.135      |              |
| M67 | Estimate | 1.480     | -1.237           | -0.820 | -0.857 | -           | -0.078   | -        | 0.135  | -         | 0.141                      | -0.237                                           | -           | 3.35         |
|     | 95% CI   | Low.      | 1.009            | -1.862 | -1.351 | -1.374      | -        | -0.256   | -      | -0.044    | -                          | -0.455                                           | -           |              |
|     | Upp.     | 1.952     | -0.612           | -0.289 | -0.341 | -           | 0.099    | -        | 0.314  | -         | 0.342                      | -0.020                                           | -           |              |
| M68 | Estimate | 1.519     | -1.210           | -0.894 | -0.846 | -0.035      | -        | -        | -      | -         | 0.132                      | -0.241                                           | -           | 3.37         |
|     | 95% CI   | Low.      | 1.049            | -1.855 | -1.431 | -1.376      | -0.230   | -        | -      | -         | -0.071                     | -0.460                                           | -           |              |
|     | Upp.     | 1.989     | -0.566           | -0.356 | -0.315 | 0.161       | -        | -        | -      | -         | 0.334                      | -0.022                                           | -           |              |
| M69 | Estimate | 0.723     | -                | -      | -      | -           | -0.098   | -        | -      | -         | 0.036                      | -0.196                                           | -0.302      | 3.39         |
|     | 95% CI   | Low.      | 0.423            | -      | -      | -           | -        | -0.280   | -      | -         | -0.162                     | -0.417                                           | -0.514      |              |
|     | Upp.     | 1.023     | -                | -      | -      | -           | 0.085    | -        | -      | -         | 0.234                      | 0.026                                            | -0.090      |              |
| M70 | Estimate | 1.238     | -1.039           | -0.459 | -0.585 | -0.095      | -        | -        | -      | -         | 0.116                      | -                                                | -0.295      | 3.39         |
|     | 95% CI   | Low.      | 0.679            | -1.720 | -1.134 | -1.181      | -0.290   | -        | -      | -         | -0.088                     | -                                                | -0.548      |              |
|     | Upp.     | 1.797     | -0.358           | 0.216  | 0.011  | 0.100       | -        | -        | -      | -         | 0.319                      | -                                                | -0.043      |              |
| M71 | Estimate | 0.730     | -                | -      | -      | -           | -        | 0.065    | 0.067  | -         | -                          | -0.188                                           | -0.286      | 3.41         |
|     | 95% CI   | Low.      | 0.437            | -      | -      | -           | -        | -        | -0.106 | -         | -                          | -0.409                                           | -0.499      |              |
|     | Upp.     | 1.023     | -                | -      | -      | -           | -        | 0.239    | 0.240  | -         | -                          | 0.032                                            | -0.073      |              |

Table B.9A. [Continued]

|     |             | <i>Intercept</i> | <i>Month (ref: May)</i> |             |               | <i>Fallow deer</i> | <i>Roe deer</i> | <i>Red deer</i> | <i>Moose</i> | <i>Wild boar</i> | <i>Mean height field layer</i> | <i>Coefficient of variance of height field layer</i> | <i>Temperature</i> | <i>ΔAIC</i> |
|-----|-------------|------------------|-------------------------|-------------|---------------|--------------------|-----------------|-----------------|--------------|------------------|--------------------------------|------------------------------------------------------|--------------------|-------------|
|     |             |                  | <i>June</i>             | <i>July</i> | <i>August</i> |                    |                 |                 |              |                  |                                |                                                      |                    |             |
| M72 | Estimate    | 0.723            | -                       | -           | -             | -0.036             | -0.094          | -               | -            | -                | -0.185                         | -0.304                                               | 3.43               |             |
|     | 95% CI Low. | 0.424            | -                       | -           | -             | -0.239             | -0.277          | -               | -            | -                | -0.403                         | -0.518                                               |                    |             |
|     | 95% CI Upp. | 1.023            | -                       | -           | -             | 0.166              | 0.088           | -               | -            | -                | 0.034                          | -0.090                                               |                    |             |
| M73 | Estimate    | 1.505            | -1.198                  | -0.881      | -0.831        | -                  | -               | -               | -            | -0.001           | 0.134                          | -0.246                                               | 3.49               |             |
|     | 95% CI Low. | 1.031            | -1.845                  | -1.415      | -1.371        | -                  | -               | -               | -            | -0.213           | -0.070                         | -0.469                                               |                    |             |
|     | 95% CI Upp. | 1.980            | -0.551                  | -0.347      | -0.291        | -                  | -               | -               | -            | 0.213            | 0.339                          | -0.024                                               |                    |             |
| M74 | Estimate    | 0.716            | -                       | -           | -             | -                  | -0.096          | -               | -            | 0.022            | -                              | -0.185                                               | 3.52               |             |
|     | 95% CI Low. | 0.410            | -                       | -           | -             | -                  | -0.278          | -               | -            | -0.181           | -                              | -0.406                                               |                    |             |
|     | 95% CI Upp. | 1.022            | -                       | -           | -             | -                  | 0.086           | -               | -            | 0.225            | -                              | 0.035                                                |                    |             |
| M75 | Estimate    | 1.225            | -1.093                  | -0.406      | -0.628        | -0.091             | -               | -               | 0.146        | -                | 0.120                          | -                                                    | -0.296             | 3.53        |
|     | 95% CI Low. | 0.665            | -1.763                  | -1.075      | -1.215        | -0.286             | -               | -               | -0.037       | -                | -0.084                         | -                                                    | -0.547             |             |
|     | 95% CI Upp. | 1.785            | -0.424                  | 0.262       | -0.041        | 0.105              | -               | -               | 0.328        | -                | 0.325                          | -                                                    | -0.045             |             |
| M76 | Estimate    | 1.208            | -1.065                  | -0.412      | -0.592        | -                  | -               | -               | 0.134        | 0.014            | 0.141                          | -0.200                                               | -0.241             | 3.54        |
|     | 95% CI Low. | 0.654            | -1.727                  | -1.084      | -1.173        | -                  | -               | -               | -0.053       | -0.197           | -0.066                         | -0.423                                               | -0.494             |             |
|     | 95% CI Upp. | 1.762            | -0.403                  | 0.260       | 0.009         | -                  | -               | -               | 0.320        | 0.224            | 0.348                          | 0.023                                                | 0.012              |             |
| M77 | Estimate    | 1.099            | -0.866                  | -0.337      | -0.438        | -0.065             | -0.077          | -               | -            | -                | -                              | -0.182                                               | -0.267             | 3.59        |
|     | 95% CI Low. | 0.544            | -1.512                  | -1.016      | -1.029        | -0.261             | -0.255          | -               | -            | -                | -                              | -0.397                                               | -0.527             |             |
|     | 95% CI Upp. | 1.654            | -0.221                  | 0.342       | 0.152         | 0.131              | 0.100           | -               | -            | -                | -                              | 0.033                                                | -0.006             |             |
| M78 | Estimate    | 0.721            | -                       | -           | -             | -0.056             | -0.101          | -               | -            | -                | -                              | -                                                    | -0.350             | 3.62        |
|     | 95% CI Low. | 0.404            | -                       | -           | -             | -0.261             | -0.282          | -               | -            | -                | -                              | -                                                    | -0.562             |             |
|     | 95% CI Upp. | 1.038            | -                       | -           | -             | 0.149              | 0.081           | -               | -            | -                | -                              | -                                                    | -0.138             |             |
| M79 | Estimate    | 0.725            | -                       | -           | -             | -                  | -               | 0.074           | 0.077        | -                | -                              | -                                                    | -0.325             | 3.66        |
|     | 95% CI Low. | 0.412            | -                       | -           | -             | -                  | -               | -0.096          | -0.096       | -                | -                              | -                                                    | -0.538             |             |
|     | 95% CI Upp. | 1.039            | -                       | -           | -             | -                  | -               | 0.245           | 0.249        | -                | -                              | -                                                    | -0.112             |             |
| M80 | Estimate    | 1.222            | -1.007                  | -0.468      | -0.551        | -                  | -               | 0.059           | -            | -                | 0.123                          | -                                                    | -0.284             | 3.68        |
|     | 95% CI Low. | 0.655            | -1.693                  | -1.147      | -1.148        | -                  | -               | -0.106          | -            | -                | -0.081                         | -                                                    | -0.537             |             |
|     | 95% CI Upp. | 1.789            | -0.321                  | 0.212       | 0.047         | -                  | -               | 0.224           | -            | -                | 0.328                          | -                                                    | -0.032             |             |
| M81 | Estimate    | 0.708            | -                       | -           | -             | -                  | -0.105          | -               | -            | 0.048            | -                              | -                                                    | -0.336             | 3.70        |
|     | 95% CI Low. | 0.378            | -                       | -           | -             | -                  | -0.284          | -               | -            | -0.156           | -                              | -                                                    | -0.548             |             |
|     | 95% CI Upp. | 1.038            | -                       | -           | -             | -                  | 0.075           | -               | -            | 0.252            | -                              | -                                                    | -0.124             |             |
| M82 | Estimate    | 1.081            | -0.084                  | -0.333      | -0.410        | -                  | -0.079          | 0.038           | -            | -                | -                              | -0.189                                               | -0.260             | 3.75        |
|     | 95% CI Low. | 0.523            | -1.477                  | -1.014      | -1.001        | -                  | -0.257          | -0.128          | -            | -                | -                              | -0.404                                               | -0.521             |             |
|     | 95% CI Upp. | 1.638            | -0.193                  | 0.349       | 0.180         | -                  | 0.098           | 0.205           | -            | -                | -                              | 0.026                                                | 0.001              |             |
| M83 | Estimate    | 0.732            | -                       | -           | -             | -0.036             | -               | -               | 0.067        | -                | -                              | -0.187                                               | -0.284             | 3.80        |
|     | 95% CI Low. | 0.437            | -                       | -           | -             | -0.239             | -               | -               | -0.106       | -                | -                              | -0.408                                               | -0.498             |             |
|     | 95% CI Upp. | 1.026            | -                       | -           | -             | 0.167              | -               | -               | 0.240        | -                | -                              | 0.034                                                | -0.070             |             |

Table B.9A. [Continued]

|     |          |      | Intercept | Month (ref: May) |        |        | Fallow deer | Roe deer | Red deer | Moose  | Wild boar | Mean height field layer | Coefficient of variance of height field layer | Temperature | $\Delta$ AIC |
|-----|----------|------|-----------|------------------|--------|--------|-------------|----------|----------|--------|-----------|-------------------------|-----------------------------------------------|-------------|--------------|
|     |          |      | June      | July             | August |        |             |          |          |        |           |                         |                                               |             |              |
| M84 | Estimate |      | 0.731     | -                | -      | -      | -           | -        | 0.069    | -      | 0.031     | -0.198                  | -0.281                                        | 3.80        |              |
|     | 95% CI   | Low. | 0.436     | -                | -      | -      | -           | -        | -0.104   | -      | -0.171    | -0.421                  | -0.494                                        |             |              |
|     |          | Upp. | 1.026     | -                | -      | -      | -           | -        | 0.242    | -      | 0.233     | 0.025                   | -0.068                                        |             |              |
| M85 | Estimate |      | 1.107     | -0.866           | -0.338 | -0.464 | -0.086      | -0.081   | -        | -      | -         | -                       | -0.310                                        | 3.81        |              |
|     | 95% CI   | Low. | 0.542     | -1.513           | -1.013 | -1.051 | -0.284      | -0.259   | -        | -      | -         | -                       | -0.566                                        |             |              |
|     |          | Upp. | 1.671     | -0.220           | 0.337  | 0.123  | 0.112       | 0.096    | -        | -      | -         | -                       | -0.053                                        |             |              |
| M86 | Estimate |      | 0.724     | -                | -      | -      | -           | -        | 0.074    | 0.035  | -         | -0.186                  | -0.276                                        | 3.81        |              |
|     | 95% CI   | Low. | 0.422     | -                | -      | -      | -           | -        | -0.100   | -0.168 | -         | -0.408                  | -0.488                                        |             |              |
|     |          | Upp. | 1.025     | -                | -      | -      | -           | -        | 0.249    | 0.238  | -         | 0.036                   | -0.064                                        |             |              |
| M87 | Estimate |      | 0.741     | -                | -      | -      | -           | 0.072    | -        | -      | 0.043     | -0.200                  | -0.295                                        | 3.82        |              |
|     | 95% CI   | Low. | 0.456     | -                | -      | -      | -           | -        | -0.104   | -      | -0.159    | -0.422                  | -0.507                                        |             |              |
|     |          | Upp. | 1.027     | -                | -      | -      | -           | -        | 0.249    | -      | 0.245     | 0.022                   | -0.082                                        |             |              |
| M88 | Estimate |      | 1.212     | -1.064           | -0.415 | -0.598 | -           | -        | 0.052    | 0.146  | -         | 0.128                   | -                                             | -0.285      | 3.84         |
|     | 95% CI   | Low. | 0.647     | -1.737           | -1.088 | -1.185 | -           | -        | -0.112   | -0.038 | -         | -0.078                  | -                                             | -0.536      |              |
|     |          | Upp. | 1.778     | -0.391           | 0.257  | -0.011 | -           | -        | 0.216    | 0.329  | -         | 0.335                   | -                                             | -0.034      |              |
| M89 | Estimate |      | 1.094     | -0.916           | -0.284 | -0.510 | -0.083      | -0.089   | -        | 0.144  | -         | -                       | -                                             | -0.312      | 3.86         |
|     | 95% CI   | Low. | 0.529     | -1.555           | -0.954 | -1.091 | -0.281      | -0.265   | -        | -0.033 | -         | -                       | -                                             | -0.567      |              |
|     |          | Upp. | 1.660     | -0.277           | 0.386  | 0.071  | 0.116       | 0.088    | -        | 0.322  | -         | -                       | -                                             | -0.056      |              |
| M90 | Estimate |      | 0.713     | -                | -      | -      | -           | -0.106   | -        | -      | 0.008     | -                       | -0.344                                        | 3.87        |              |
|     | 95% CI   | Low. | 0.387     | -                | -      | -      | -           | -0.287   | -        | -      | -0.187    | -                       | -0.557                                        |             |              |
|     |          | Upp. | 1.039     | -                | -      | -      | -           | 0.075    | -        | -      | 0.202     | -                       | -0.131                                        |             |              |
| M91 | Estimate |      | 1.499     | -1.246           | -0.843 | -0.861 | -           | -        | 0.036    | 0.128  | -         | 0.138                   | -0.236                                        | -           | 3.91         |
|     | 95% CI   | Low. | 1.030     | -1.881           | -1.382 | -1.383 | -           | -        | -0.129   | -0.053 | -         | -0.067                  | -0.455                                        | -           |              |
|     |          | Upp. | 1.968     | -0.612           | -0.305 | -0.339 | -           | -        | 0.201    | 0.310  | -         | 0.343                   | -0.016                                        | -           |              |
| M92 | Estimate |      | 1.554     | -1.220           | -0.951 | -0.887 | -           | -        | -        | -      | 0.108     | -                       | -                                             | -           | 3.95         |
|     | 95% CI   | Low. | 1.057     | -1.880           | -1.491 | -1.419 | -           | -        | -        | -      | -0.094    | -                       | -                                             | -           |              |
|     |          | Upp. | 2.051     | -0.560           | -0.411 | -0.355 | -           | -        | -        | -      | 0.311     | -                       | -                                             | -           |              |
| M93 | Estimate |      | 1.082     | -0.841           | -0.334 | -0.417 | -           | -0.082   | -        | -      | 0.007     | -                       | -0.189                                        | -0.255      | 3.96         |
|     | 95% CI   | Low. | 0.522     | -1.481           | -1.012 | -1.007 | -           | -        | -0.260   | -      | -0.205    | -                       | -0.406                                        | -0.515      |              |
|     |          | Upp. | 1.641     | -0.201           | 0.344  | 0.173  | -           | -        | 0.095    | -      | 0.218     | -                       | 0.027                                         | 0.006       |              |
| M94 | Estimate |      | 0.717     | -                | -      | -      | -           | -        | 0.087    | 0.063  | -         | -                       | -0.313                                        | 3.98        |              |
|     | 95% CI   | Low. | 0.392     | -                | -      | -      | -           | -        | -0.086   | -0.140 | -         | -                       | -0.525                                        |             |              |
|     |          | Upp. | 1.042     | -                | -      | -      | -           | -        | 0.260    | 0.266  | -         | -                       | -0.101                                        |             |              |
| M95 | Estimate |      | 0.739     | -                | -      | -      | -0.027      | -        | 0.062    | -      | -         | -0.189                  | -0.293                                        | 3.99        |              |
|     | 95% CI   | Low. | 0.451     | -                | -      | -      | -0.232      | -        | -0.116   | -      | -         | -0.409                  | -0.506                                        |             |              |
|     |          | Upp. | 1.027     | -                | -      | -      | 0.178       | -        | 0.240    | -      | -         | 0.032                   | -0.080                                        |             |              |

Table B.9B. Standardized model estimates with 95% confidence intervals for the analysis of the association between the abundance of questing *I. ricinus* nymphs and adults, and ungulate visitation frequencies, for the deer species summed. Models presented are the best performing GLMMs with a negative binomial distribution. The final model selected on which interpretations were based is highlighted in bold. M = model.

|     |          |      | Intercept    | Month (ref: May) |        |        | Deer   | Wild boar | Mean height<br>field layer | Coefficient of variance<br>of height field layer | Temperature   | $\Delta$ AIC |
|-----|----------|------|--------------|------------------|--------|--------|--------|-----------|----------------------------|--------------------------------------------------|---------------|--------------|
|     |          |      |              | June             | July   | August |        |           |                            |                                                  |               |              |
| M1  | Estimate |      | 1.125        | -0.879           | -0.381 | -0.456 | -      | -         | -                          | -0.195                                           | -0.237        | 0.00         |
|     | 95% CI   | Low. | 0.577        | -1.521           | -1.053 | -1.038 | -      | -         | -                          | -0.410                                           | -0.496        |              |
|     |          | Upp. | 1.673        | -0.237           | 0.291  | 0.126  | -      | -         | -                          | 0.019                                            | 0.018         |              |
| M2  | Estimate |      | 0.731        | -                | -      | -      | -      | -         | -                          | -0.196                                           | -0.282        | 0.14         |
|     | 95% CI   | Low. | 0.435        | -                | -      | -      | -      | -         | -                          | -0.414                                           | -0.492        |              |
|     |          | Upp. | 1.028        | -                | -      | -      | -      | -         | -                          | 0.022                                            | -0.071        |              |
| M3  | Estimate |      | 1.406        | -1.055           | -0.793 | -0.732 | -      | -         | -                          | -0.228                                           | -             | 0.45         |
|     | 95% CI   | Low. | 0.945        | -1.665           | -1.317 | -1.243 | -      | -         | -                          | -0.442                                           | -             |              |
|     |          | Upp. | 1.868        | -0.445           | -0.269 | -0.222 | -      | -         | -                          | -0.014                                           | -             |              |
| M4  | Estimate |      | 1.224        | -1.026           | -0.461 | -0.553 | -      | -         | 0.143                      | -0.215                                           | -0.241        | 0.59         |
|     | 95% CI   | Low. | 0.674        | -1.697           | -1.137 | -1.145 | -      | -         | -0.061                     | -0.434                                           | -0.493        |              |
|     |          | Upp. | 1.774        | -0.355           | 0.216  | 0.039  | -      | -         | 0.346                      | 0.003                                            | 0.012         |              |
| M5  | Estimate |      | 1.136        | -0.879           | -0.393 | -0.478 | -      | -         | -                          | -                                                | -0.275        | 0.77         |
|     | 95% CI   | Low. | 0.577        | -1.523           | -1.059 | -1.054 | -      | -         | -                          | -                                                | -0.527        |              |
|     |          | Upp. | 1.696        | -0.236           | 0.273  | 0.099  | -      | -         | -                          | -                                                | -0.022        |              |
| M6  | Estimate |      | <b>0.729</b> | -                | -      | -      | -      | -         | -                          | -                                                | <b>-0.324</b> | <b>0.82</b>  |
|     | 95% CI   | Low. | <b>0.411</b> | -                | -      | -      | -      | -         | -                          | -                                                | <b>-0.534</b> |              |
|     |          | Upp. | <b>1.046</b> | -                | -      | -      | -      | -         | -                          | -                                                | <b>-0.113</b> |              |
| M7  | Estimate |      | 1.505        | -1.198           | -0.881 | -0.831 | -      | -         | 0.134                      | -0.246                                           | -             | 1.14         |
|     | 95% CI   | Low. | 1.038        | -1.840           | -1.414 | -1.354 | -      | -         | -0.068                     | -0.465                                           | -             |              |
|     |          | Upp. | 1.973        | -0.556           | -0.348 | -0.308 | -      | -         | 0.337                      | -0.028                                           | -             |              |
| M8  | Estimate |      | 0.733        | -                | -      | -      | -0.084 | -         | -                          | -0.198                                           | -0.300        | 1.71         |
|     | 95% CI   | Low. | 0.443        | -                | -      | -      | -0.285 | -         | -                          | -0.416                                           | -0.514        |              |
|     |          | Upp. | 1.023        | -                | -      | -      | 0.117  | -         | -                          | 0.020                                            | -0.086        |              |
| M9  | Estimate |      | 1.554        | -1.220           | -0.951 | -0.887 | -      | -         | 0.108                      | -                                                | -             | 1.86         |
|     | 95% CI   | Low. | 1.057        | -1.880           | -1.491 | -1.419 | -      | -         | -0.094                     | -                                                | -             |              |
|     |          | Upp. | 2.051        | -0.560           | -0.411 | -0.355 | -      | -         | 0.311                      | -                                                | -             |              |
| M10 | Estimate |      | 1.106        | -0.854           | -0.344 | -0.451 | -0.066 | -         | -                          | -0.195                                           | -0.258        | 2.02         |
|     | 95% CI   | Low. | 0.559        | -1.499           | -1.023 | -1.033 | -0.269 | -         | -                          | -0.409                                           | -0.521        |              |
|     |          | Upp. | 1.654        | -0.210           | 0.334  | 0.132  | 0.137  | -         | -                          | 0.019                                            | 0.004         |              |
| M11 | Estimate |      | 0.736        | -                | -      | -      | -      | -         | 0.032                      | -0.202                                           | -0.285        | 2.21         |
|     | 95% CI   | Low. | 0.443        | -                | -      | -      | -      | -         | -0.168                     | -0.424                                           | -0.496        |              |
|     |          | Upp. | 1.029        | -                | -      | -      | -      | -         | 0.232                      | 0.019                                            | -0.074        |              |



Table B.9B. [Continued]

|     |             | <i>Intercept</i> | <i>Month (ref: May)</i> |             |               | <i>Deer</i> | <i>Wild boar</i> | <i>Mean height field layer</i> | <i>Coefficient of variance of height field layer</i> | <i>Temperature</i> | $\Delta$ AIC |
|-----|-------------|------------------|-------------------------|-------------|---------------|-------------|------------------|--------------------------------|------------------------------------------------------|--------------------|--------------|
|     |             |                  | <i>June</i>             | <i>July</i> | <i>August</i> |             |                  |                                |                                                      |                    |              |
| M12 | Estimate    | 0.730            | -                       | -           | -             | -           | 0.021            | -                              | -0.193                                               | -0.280             | 2.32         |
|     | 95% CI Low. | 0.432            | -                       | -           | -             | -           | -0.180           | -                              | -0.413                                               | -0.491             |              |
|     | Upp.        | 1.028            | -                       | -           | -             | -           | 0.222            | -                              | 0.028                                                | -0.070             |              |
| M13 | Estimate    | 1.124            | -0.787                  | -0.382      | -0.454        | -           | 0.006            | -                              | -0.194                                               | -0.237             | 2.34         |
|     | 95% CI Low. | 0.575            | -1.520                  | -1.053      | -1.040        | -           | -0.203           | -                              | -0.411                                               | -0.493             |              |
|     | Upp.        | 1.673            | -0.235                  | 0.290       | 0.132         | -           | 0.215            | -                              | 0.022                                                | 0.020              |              |
| M14 | Estimate    | 0.729            | -                       | -           | -             | -0.078      | -                | -                              | -                                                    | -0.343             | 2.40         |
|     | 95% CI Low. | 0.416            | -                       | -           | -             | -0.275      | -                | -                              | -                                                    | -0.558             |              |
|     | Upp.        | 1.041            | -                       | -           | -             | 0.118       | -                | -                              | -                                                    | -0.128             |              |
| M15 | Estimate    | 1.406            | -1.055                  | -0.793      | -0.732        | -           | 0.021            | -                              | -0.228                                               | -                  | 2.72         |
|     | 95% CI Low. | 0.945            | -1.665                  | -1.317      | -1.243        | -           | -0.193           | -                              | -0.442                                               | -                  |              |
|     | Upp.        | 1.868            | -0.445                  | -0.269      | -0.222        | -           | 0.235            | -                              | -0.007                                               | -                  |              |
| M16 | Estimate    | 1.114            | -0.854                  | -0.351      | -0.474        | -0.066      | -                | -                              | -                                                    | -0.298             | 2.72         |
|     | 95% CI Low. | 0.555            | -1.499                  | -1.026      | -1.050        | -0.265      | -                | -                              | -                                                    | -0.559             |              |
|     | Upp.        | 1.674            | -0.209                  | 0.324       | 0.103         | 0.133       | -                | -                              | -                                                    | -0.037             |              |
| M17 | Estimate    | 1.408            | -1.053                  | -0.794      | -0.737        | -0.014      | -                | -                              | -0.229                                               | -                  | 2.74         |
|     | 95% CI Low. | 0.947            | -1.663                  | -1.317      | -1.251        | -0.213      | -                | -                              | -0.443                                               | -                  |              |
|     | Upp.        | 1.869            | -0.442                  | -0.270      | -0.222        | 0.185       | -                | -                              | -0.015                                               | -                  |              |
| M18 | Estimate    | 1.401            | -1.050                  | -0.792      | -0.733        | -           | -                | -                              | -                                                    | -                  | 2.76         |
|     | 95% CI Low. | 0.935            | -1.661                  | -1.315      | -1.242        | -           | -                | -                              | -                                                    | -                  |              |
|     | Upp.        | 1.866            | -0.439                  | -0.268      | -0.203        | -           | -                | -                              | -                                                    | -                  |              |
| M19 | Estimate    | 1.205            | -0.998                  | -0.428      | -0.545        | -0.054      | -                | 0.137                          | -0.214                                               | -0.257             | 2.77         |
|     | 95% CI Low. | 0.653            | -1.675                  | -1.113      | -1.138        | -0.259      | -                | -0.066                         | -0.432                                               | -0.516             |              |
|     | Upp.        | 1.757            | -0.321                  | 0.258       | 0.048         | 0.151       | -                | 0.341                          | 0.004                                                | 0.002              |              |
| M20 | Estimate    | 0.725            | -                       | -           | -             | -           | 0.049            | -                              | -                                                    | -0.318             | 2.79         |
|     | 95% CI Low. | 0.404            | -                       | -           | -             | -           | -0.154           | -                              | -                                                    | -0.529             |              |
|     | Upp.        | 1.047            | -                       | -           | -             | -           | 0.250            | -                              | -                                                    | -0.107             |              |
| M21 | Estimate    | 1.131            | -0.873                  | -0.396      | -0.468        | -           | 0.034            | -                              | -                                                    | -0.269             | 2.95         |
|     | 95% CI Low. | 0.570            | -1.515                  | -1.062      | -1.045        | -           | -0.176           | -                              | -                                                    | -0.523             |              |
|     | Upp.        | 1.692            | -0.231                  | 0.269       | 0.110         | -           | 0.244            | -                              | -                                                    | -0.015             |              |
| M22 | Estimate    | 1.228            | -1.031                  | -0.461      | -0.560        | -           | -0.014           | 0.144                          | -0.218                                               | -0.242             | 2.98         |
|     | 95% CI Low. | 0.676            | -1.706                  | -1.137      | -1.162        | -           | -0.220           | -0.061                         | -0.439                                               | -0.495             |              |
|     | Upp.        | 1.780            | -0.356                  | 0.215       | 0.042         | -           | 0.193            | 0.350                          | 0.003                                                | 0.011              |              |
| M23 | Estimate    | 0.729            | -                       | -           | -             | -           | -                | 0.001                          | -                                                    | -0.324             | 2.99         |
|     | 95% CI Low. | 0.410            | -                       | -           | -             | -           | -                | -0.196                         | -                                                    | -0.536             |              |
|     | Upp.        | 1.048            | -                       | -           | -             | -           | -                | 0.199                          | -                                                    | 0.112              |              |

Table B.9B. [Continued]

|     |          |      | <i>Intercept</i> | <i>Month (ref: May)</i> |             |               | <i>Deer</i> | <i>Wild boar</i> | <i>Mean height<br/>field layer</i> | <i>Coefficient of variance<br/>of height field layer</i> | <i>Temperature</i> | $\Delta$ AIC |
|-----|----------|------|------------------|-------------------------|-------------|---------------|-------------|------------------|------------------------------------|----------------------------------------------------------|--------------------|--------------|
|     |          |      |                  | <i>June</i>             | <i>July</i> | <i>August</i> |             |                  |                                    |                                                          |                    |              |
| M24 | Estimate |      | 1.506            | -1.197                  | -0.881      | -0.832        | -0.003      | -                | 0.134                              | -0.246                                                   | -                  | 3.49         |
|     | 95% CI   | Low. | 1.038            | -1.842                  | -1.414      | -1.357        | -0.205      | -                | -0.069                             | -0.465                                                   | -                  |              |
|     |          | Upp. | 1.973            | -0.552                  | -0.348      | -0.306        | 0.198       | -                | 0.337                              | -0.028                                                   | -                  |              |
| M25 | Estimate |      | 1.505            | -1.198                  | -0.881      | -0.831        | -           | -0.001           | 0.134                              | -0.246                                                   | -                  | 3.49         |
|     | 95% CI   | Low. | 1.031            | -1.845                  | -1.415      | -1.371        | -           | -0.213           | -0.070                             | -0.469                                                   | -                  |              |
|     |          | Upp. | 1.980            | -0.551                  | -0.347      | -0.291        | -           | 0.213            | 0.339                              | -0.024                                                   | -                  |              |
| M26 | Estimate |      | 0.737            | -                       | -           | -             | -0.083      | -                | 0.031                              | -0.203                                                   | -0.303             | 3.83         |
|     | 95% CI   | Low. | 0.450            | -                       | -           | -             | -0.285      | -                | -0.168                             | -0.424                                                   | -0.517             |              |
|     |          | Upp. | 1.024            | -                       | -           | -             | 0.118       | -                | 0.230                              | 0.018                                                    | -0.089             |              |
| M27 | Estimate |      | 0.731            | -                       | -           | -             | -0.083      | 0.019            | -                                  | -0.195                                                   | -0.298             | 3.94         |
|     | 95% CI   | Low. | 0.440            | -                       | -           | -             | -0.285      | -0.182           | -                                  | -0.415                                                   | -0.512             |              |
|     |          | Upp. | 1.023            | -                       | -           | -             | 0.118       | 0.220            | -                                  | 0.026                                                    | -0.084             |              |
| M28 | Estimate |      | 1.203            | -0.986                  | -0.427      | -0.559        | -0.058      | -                | 0.112                              | -                                                        | -0.297             | 3.95         |
|     | 95% CI   | Low. | 0.632            | -1.674                  | -1.113      | -1.151        | -0.259      | -                | -0.092                             | -                                                        | -0.556             |              |
|     |          | Upp. | 1.774            | -0.298                  | 0.260       | 0.033         | 0.143       | -                | 0.315                              | -                                                        | -0.038             |              |
| M29 | Estimate |      | 1.554            | -1.220                  | -0.951      | -0.887        | -           | -                | 0.108                              | -                                                        | -                  | 3.95         |
|     | 95% CI   | Low. | 1.057            | -1.880                  | -1.491      | -1.419        | -           | -                | -0.094                             | -                                                        | -                  |              |
|     |          | Upp. | 2.051            | -0.560                  | -0.411      | -0.355        | -           | -                | 0.311                              | -                                                        | -                  |              |

Table B.9C. Standardized model estimates with 95% confidence intervals for the analysis of the association between the abundance of questing *I. ricinus* nymphs and adults, and ungulate visitation frequencies, for the ungulate species summed. Models presented are the best performing GLMMs with a negative binomial distribution. The final model selected on which interpretations were based is highlighted in bold. M = model.

|     |        |          | Intercept | Month (ref: May) |        |        | Ungulates | Mean height<br>field layer | Coefficient of variance<br>of height field layer | Temperature | $\Delta AIC$ |
|-----|--------|----------|-----------|------------------|--------|--------|-----------|----------------------------|--------------------------------------------------|-------------|--------------|
|     |        |          |           | June             | July   | August |           |                            |                                                  |             |              |
| M1  | 95% CI | Estimate | 0.727     | -                | -      | -      | -0.208    | -                          | -0.209                                           | -0.344      | 0.00         |
|     |        | Low.     | 0.452     | -                | -      | -      | -0.405    | -                          | -0.423                                           | -0.560      |              |
|     |        | Upp.     | 1.002     | -                | -      | -      | -0.011    | -                          | 0.006                                            | -0.128      |              |
| M2  | 95% CI | Estimate | 1.062     | -0.803           | -0.269 | -0.434 | -0.196    | -                          | -0.201                                           | -0.313      | 0.73         |
|     |        | Low.     | 0.528     | -1.439           | -0.931 | -1.012 | -0.395    | -                          | -0.413                                           | -0.577      |              |
|     |        | Upp.     | 1.596     | -0.168           | 0.394  | 0.143  | 0.004     | -                          | 0.011                                            | -0.049      |              |
| M3  | 95% CI | Estimate | 0.724     | -                | -      | -      | -0.190    | -                          | -                                                | -0.389      | 1.11         |
|     |        | Low.     | 0.426     | -                | -      | -      | -0.384    | -                          | -                                                | -0.608      |              |
|     |        | Upp.     | 1.022     | -                | -      | -      | 0.003     | -                          | -                                                | -0.170      |              |
| M4  | 95% CI | Estimate | 1.125     | -0.879           | -0.381 | -0.456 | -         | -                          | -0.195                                           | -0.237      | 1.45         |
|     |        | Low.     | 0.577     | -1.521           | -1.053 | -1.038 | -         | -                          | -0.410                                           | -0.493      |              |
|     |        | Upp.     | 1.673     | -0.237           | 0.291  | 0.126  | -         | -                          | 0.019                                            | 0.018       |              |
| M5  | 95% CI | Estimate | 0.731     | -                | -      | -      | -         | -                          | -0.196                                           | -0.282      | 1.59         |
|     |        | Low.     | 0.435     | -                | -      | -      | -         | -                          | -0.414                                           | -0.492      |              |
|     |        | Upp.     | 1.028     | -                | -      | -      | -         | -                          | 0.022                                            | -0.071      |              |
| M6  | 95% CI | Estimate | 1.155     | -0.933           | -0.350 | -0.524 | -0.187    | 0.126                      | -0.216                                           | -0.309      | 1.66         |
|     |        | Low.     | 0.613     | -1.598           | -1.020 | -1.115 | -0.388    | -0.074                     | -0.430                                           | -0.569      |              |
|     |        | Upp.     | 1.697     | -0.268           | 0.321  | 0.066  | 0.014     | 0.326                      | -0.002                                           | -0.048      |              |
| M7  | 95% CI | Estimate | 1.069     | -0.808           | -0.270 | -0.460 | -0.185    | -                          | -                                                | -0.357      | 1.68         |
|     |        | Low.     | 0.523     | -1.444           | -0.931 | -1.032 | -0.382    | -                          | -                                                | -0.620      |              |
|     |        | Upp.     | 1.616     | -0.172           | 0.392  | 0.111  | 0.013     | -                          | -                                                | -0.093      |              |
| M8  | 95% CI | Estimate | 1.406     | -1.055           | -0.793 | -0.732 | -         | -                          | -0.228                                           | -           | 1.90         |
|     |        | Low.     | 0.945     | -1.665           | -1.317 | -1.243 | -         | -                          | -0.442                                           | -           |              |
|     |        | Upp.     | 1.868     | -0.445           | -0.269 | -0.222 | -         | -                          | -0.014                                           | -           |              |
| M9  | 95% CI | Estimate | 1.224     | -1.026           | -0.461 | -0.553 | -         | 0.143                      | -0.215                                           | -0.241      | 2.05         |
|     |        | Low.     | 0.674     | -1.697           | -1.137 | -1.145 | -         | -0.061                     | -0.434                                           | -0.493      |              |
|     |        | Upp.     | 1.774     | -0.355           | 0.216  | 0.039  | -         | 0.346                      | 0.003                                            | 0.012       |              |
| M10 | 95% CI | Estimate | 0.731     | -                | -      | -      | -0.208    | 0.028                      | -0.213                                           | -0.346      | 2.12         |
|     |        | Low.     | 0.458     | -                | -      | -      | -0.405    | -0.167                     | -0.430                                           | -0.563      |              |
|     |        | Upp.     | 1.004     | -                | -      | -      | -0.011    | 0.222                      | 0.003                                            | -0.130      |              |
| M11 | 95% CI | Estimate | 1.136     | -0.879           | -0.393 | -0.478 | -         | -                          | -                                                | -0.275      | 2.22         |
|     |        | Low.     | 0.577     | -1.523           | -1.059 | -1.054 | -         | -                          | -                                                | -0.527      |              |
|     |        | Upp.     | 1.696     | -0.236           | 0.273  | 0.099  | -         | -                          | -                                                | -0.022      |              |

Table B.9C. [Continued]

|            |                   |                   | <i>Intercept</i> | <i>Month (ref: May)</i> |             |               | <i>Ungulates</i> | <i>Mean height<br/>field layer</i> | <i>Coefficient of variance<br/>of height field layer</i> | <i>Temperature</i> | $\Delta$ AIC |
|------------|-------------------|-------------------|------------------|-------------------------|-------------|---------------|------------------|------------------------------------|----------------------------------------------------------|--------------------|--------------|
|            |                   |                   |                  | <i>June</i>             | <i>July</i> | <i>August</i> |                  |                                    |                                                          |                    |              |
| <b>M12</b> | <b>Estimate</b>   | <b>0.729</b>      | -                | -                       | -           | -             | -                | -                                  | <b>-0.324</b>                                            | <b>2.28</b>        |              |
|            | <b>95% CI</b>     | <b>Low. 0.411</b> | -                | -                       | -           | -             | -                | -                                  | <b>-0.534</b>                                            |                    |              |
|            | <b>Upp. 1.046</b> | -                 | -                | -                       | -           | -             | -                | -                                  | <b>-0.113</b>                                            |                    |              |
| M13        | Estimate          | 1.505             | -1.198           | -0.881                  | -0.831      | -             | 0.134            | -0.246                             | -                                                        | 2.59               |              |
|            | 95% CI            | Low. 1.038        | -1.840           | -1.414                  | -1.354      | -             | -0.068           | -0.465                             | -                                                        |                    |              |
|            | Upp. 1.973        | -0.556            | -0.343           | -0.308                  | -           | 0.337         | -0.028           | -                                  |                                                          |                    |              |
| M14        | Estimate          | 1.424             | -1.038           | -0.805                  | -0.775      | -0.118        | -                | -0.244                             | -                                                        | 2.81               |              |
|            | 95% CI            | Low. 0.977        | -1.642           | -1.322                  | -1.289      | -0.309        | -                | -0.457                             | -                                                        |                    |              |
|            | Upp. 1.872        | -0.435            | -0.289           | -0.261                  | 0.073       | -             | -0.030           | -                                  |                                                          |                    |              |
| M15        | Estimate          | 1.153             | -0.930           | -0.342                  | -0.542      | -0.179        | 0.104            | -                                  | -0.354                                                   | 3.01               |              |
|            | 95% CI            | Low. 0.593        | -1.607           | -1.015                  | -1.131      | -0.378        | -0.097           | -                                  | -0.616                                                   |                    |              |
|            | Upp. 1.713        | -0.253            | 0.332            | 0.047                   | 0.019       | 0.306         | -                | -0.093                             |                                                          |                    |              |
| M16        | Estimate          | 1.226             | -1.015           | -0.467                  | -0.567      | -             | 0.116            | -                                  | -0.277                                                   | 3.32               |              |
|            | 95% CI            | Low. 0.658        | -1.699           | -1.142                  | -1.158      | -             | -0.087           | -                                  | -0.528                                                   |                    |              |
|            | Upp. 1.794        | -0.332            | 0.208            | 0.025                   | -           | 0.320         | -                | -0.026                             |                                                          |                    |              |
| M17        | Estimate          | 0.724             | -                | -                       | -           | -0.190        | -0.002           | -                                  | -0.389                                                   | 3.32               |              |
|            | 95% CI            | Low. 0.423        | -                | -                       | -           | -0.384        | -0.197           | -                                  | -0.608                                                   |                    |              |
|            | Upp. 1.024        | -                 | -                | -                       | 0.003       | 0.193         | -                | -0.169                             |                                                          |                    |              |
| M18        | Estimate          | 0.736             | -                | -                       | -           | -             | 0.032            | -0.202                             | -0.285                                                   | 3.67               |              |
|            | 95% CI            | Low. 0.443        | -                | -                       | -           | -             | -0.168           | -0.424                             | -0.496                                                   |                    |              |
|            | Upp. 1.029        | -                 | -                | -                       | -           | 0.232         | 0.019            | -0.074                             |                                                          |                    |              |
| M19        | Estimate          | 1.515             | -1.168           | -0.887                  | -0.864      | -0.112        | 0.126            | -0.278                             | -                                                        | 3.71               |              |
|            | 95% CI            | Low. 1.059        | -1.803           | -1.413                  | -1.390      | -0.305        | -0.075           | -0.474                             | -                                                        |                    |              |
|            | Upp. 1.971        | -0.534            | -0.360           | -0.338                  | 0.081       | 0.326         | -0.041           | -                                  |                                                          |                    |              |
